# Supplementary material for: Co-crystallization studies of the syn- and anti-atropisomers of triphenyl-based perfluorinated halogen bond donors with halides
Source: Royal Society of Chemistry journal article supplement (doi:10.1039/d2ce00973k), 2022-01-01
Supplement: d2ce00973k1.pdf [file d2ce00973k1.pdf]

# CrystEngComm

## Supporting Information

**Crystallographic studies towards solid state behavior of *syn*- and *anti*- conformers of terphenyl based perfluorinated halogen bond donors.**

Julian Stoesser<sup>a</sup>, Elric Engelage<sup>a</sup> and Stefan M. Huber<sup>\*a</sup>

a) Department of Chemistry and Biochemistry, Ruhr-Universität Bochum, Universitätsstraße 150, 44801 Bochum, Germany. E-mail: [stefan.m.huber@rub.de](mailto:stefan.m.huber@rub.de).

## Table of Contents

|                               |    |
|-------------------------------|----|
| A.) General Information ..... | 3  |
| B.) Crystal data.....         | 14 |
| C.) References.....           | 68 |

## A.) General Information

### A.1.) Experimental setup for crystal growth

Single crystals of all the halogen bond donors were obtained by dissolving 5 mg of each one in pentane and letting the solvent slowly evaporate.

Co-crystallization experiments were set up as follows:

A 34,4 mM stock solution of the designated halogen bond donors and halide salts were set up in DCM. After that 0.1 mL of the Host and 0.1 mL of the guest solutions were transferred into a GC-vial and the solvent was slowly evaporated leading to crystal formation.

### A.2.) Crystal structure determination

Crystal structure determination was carried out on a *Rigaku* XtaLAB mini, equipped with a 600 W Mo micro-fine focus glass sealed tube, graphite monochromator (Mo  $K_{\alpha}$ ) and Mercury375R CCD detector or a *Rigaku* Synergy dual source device, with Cu and Mo micro focus sealed tubes (Cu & Mo  $K_{\alpha}$ ) using mirror monochromators and a HyPix-6000HE: Hybrid photon counting X-ray detector, Rigaku Supernova with a Cu micro focus sealed tubes, mirror monochromator and an Atlas detector, and an Agilent XCalibur with a Mo fine focus glass sealed tube, graphite monochromator, and Sapphire2 detector. Crystals were mounted in *Hampton* CryoLoops using *GE/Bayer* silicone grease or were glued on the tip of glass fibers. (Caveat: Our perfluorinated compounds have a tendency to dissolve in common cryoprotectants such as Parabar/Paratone). Data on all systems was recorded and reduced using the CrysAlisPro<sup>1</sup> Software. Structures were solved using WinGX<sup>2</sup> in combination with ShelXT<sup>3</sup> and refined with shelXle<sup>4</sup> and ShelXL. Tables for the publication were generated using a modified version of CifTab. Pictures of the structures were generated with Diamond 4<sup>5</sup>.

### A.3) Crystal Data

All ellipsoids are depicted at 50% probability. The TDA and TEA cations are generally shown only as sticks. Fluorine and hydrogen substituents are left out for clarity, if necessary. All atoms involved in non-covalent interactions are labelled and connected via dashed bonds.

Atoms colours:

| Atom | Colour      | RGB         |
|------|-------------|-------------|
| H    | White       | 0/0/0       |
| C    | Black       | 255/255/255 |
| N    | Dark blue   | 0/53/96     |
| F    | Light green | 153/204/0   |
| Cl   | Dark green  | 0/139/41    |
| Br   | Orange      | 218/87/0    |
| I    | Purple      | 128/0/128   |

#### A.2.1.) Crystal structures mentioned in the article

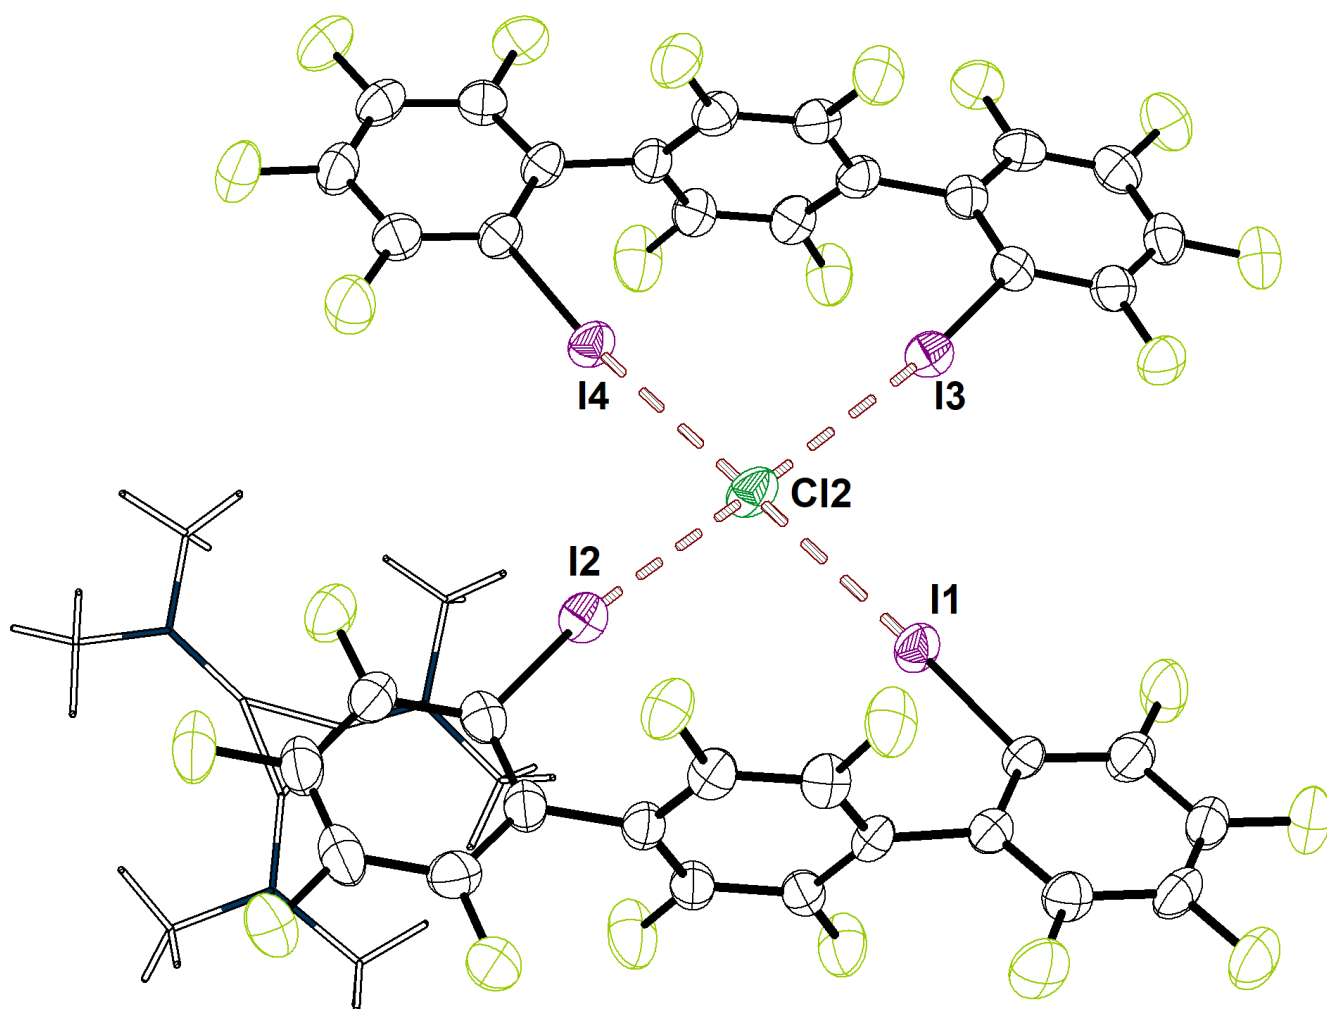

**Figure S1:** Cocystal structure of *syn-p-1* and TDA-Cl.

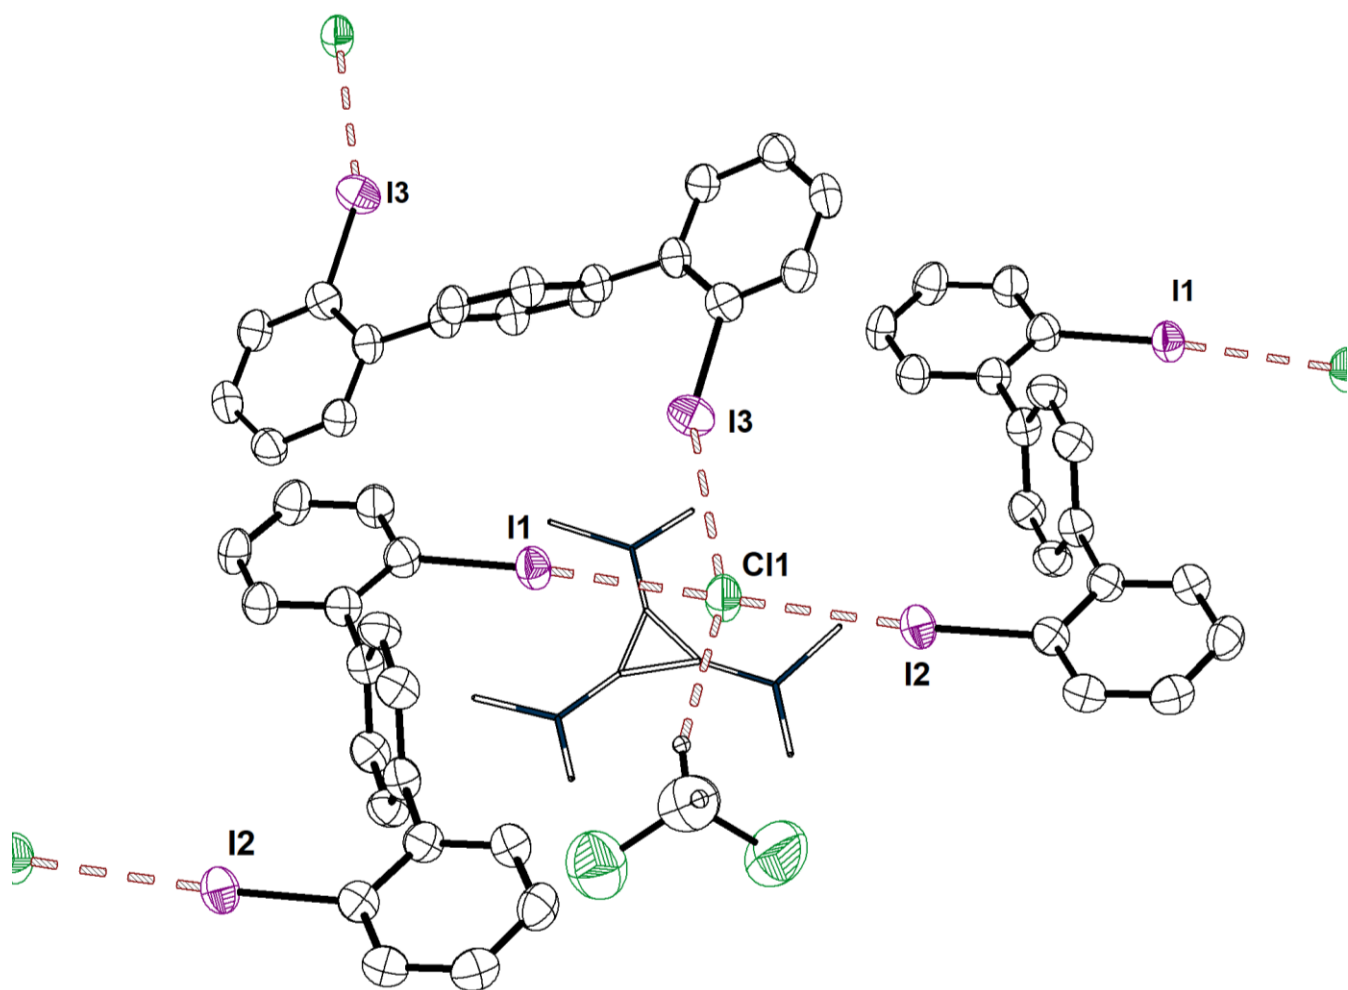

**Figure S2:** Cocrystal structure of *anti-p-1* and TDA-Cl.

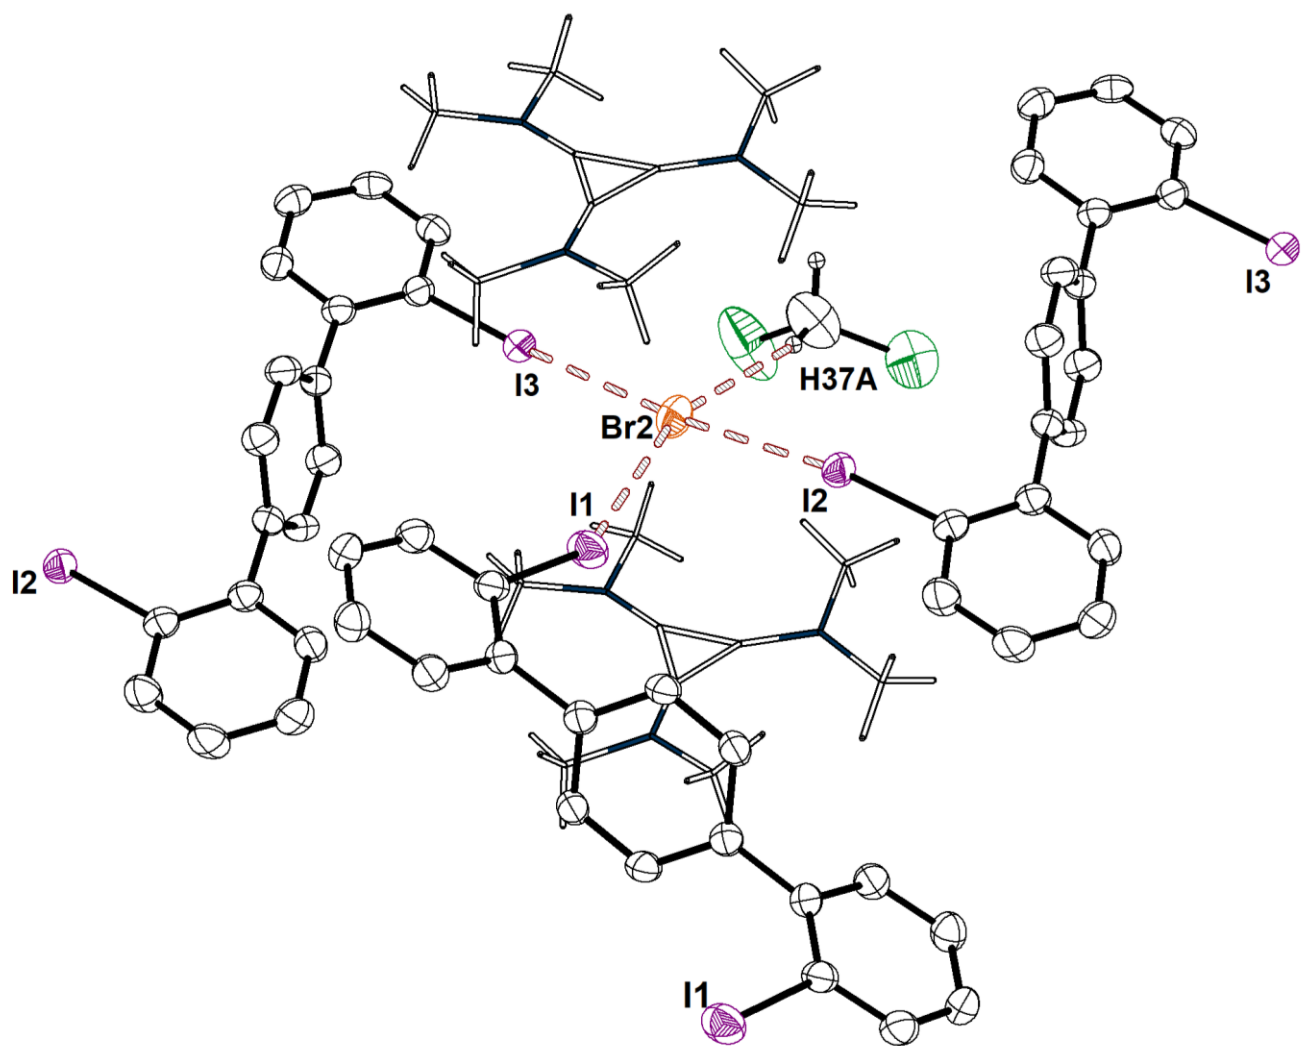

**Figure S3:** Cocrystal structure of *anti-p-1* and TDA-Br.

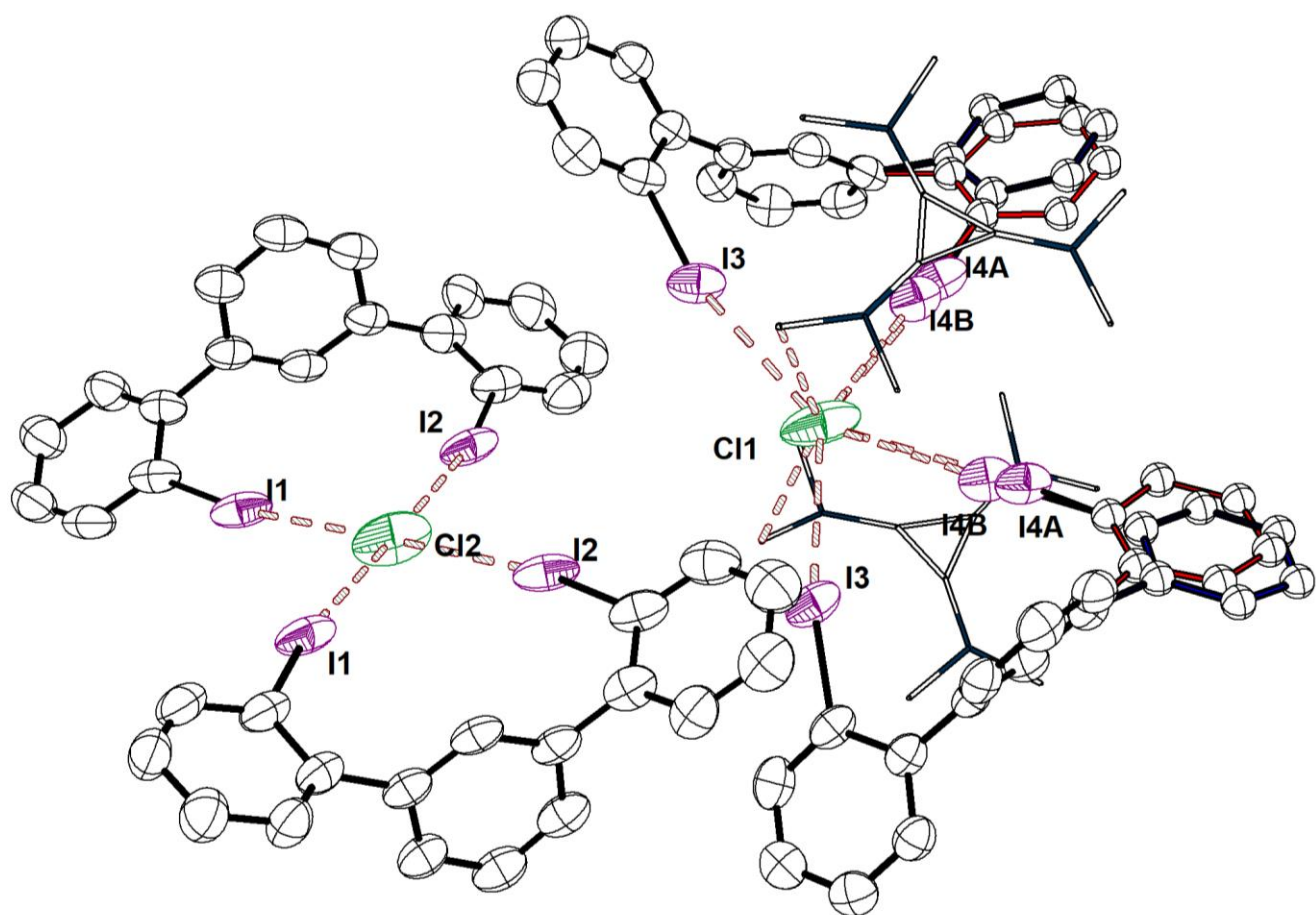

**Figure S4:** Cocrystal structure of *syn-m-1* and TDA-Cl. The disordered atoms on the right-hand side of the picture are shown as balls and sticks with red and blue bonds connecting the separate parts. Both chlorides are located on one of the twofold axes of the crystal. Attempts of solving the disorders of the chlorides resulted in non-positive defined ellipsoids and/or unstable refinements.

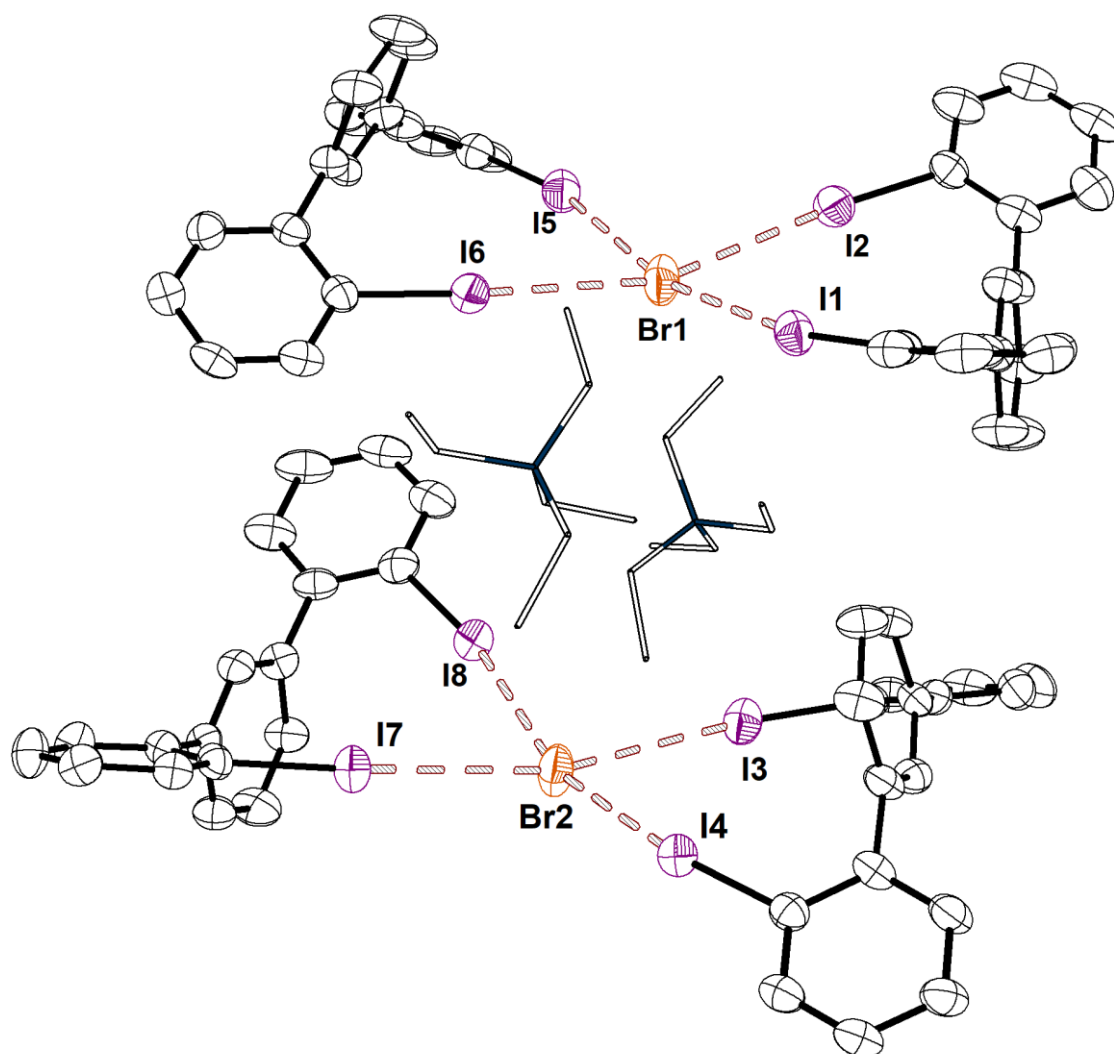

**Figure S5:** Cocrystal structure of *syn-m-1* and TEA-Br.



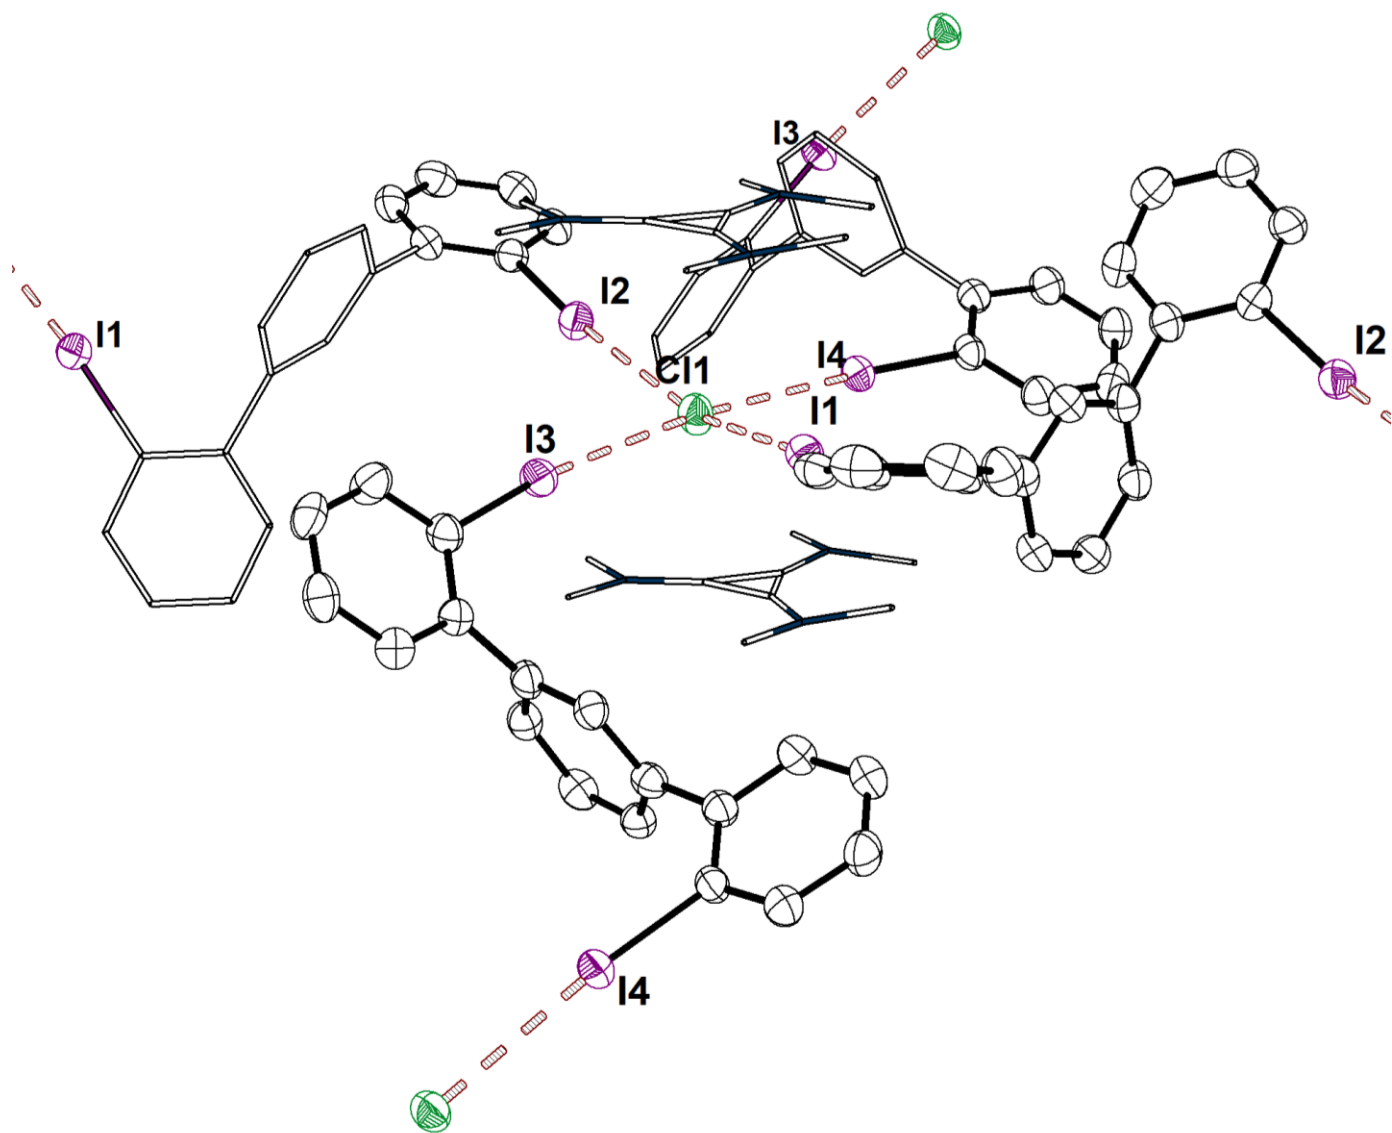

**Figure S6:** Cocrystal structure of *anti-m-1* and TDA-Cl.

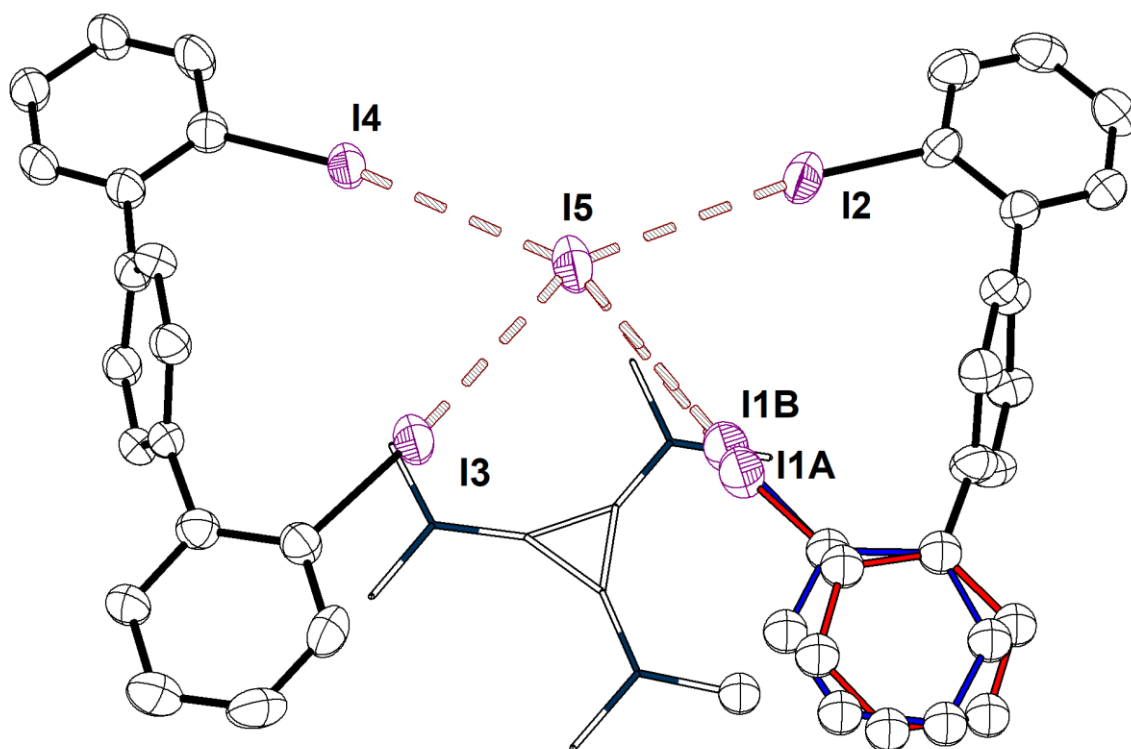

**Figure S7:** Cocrystal structure of **syn-p-1** and TDA-I. The disordered atoms are shown as balls and sticks, with bonds in red and blue, separating the two parts.

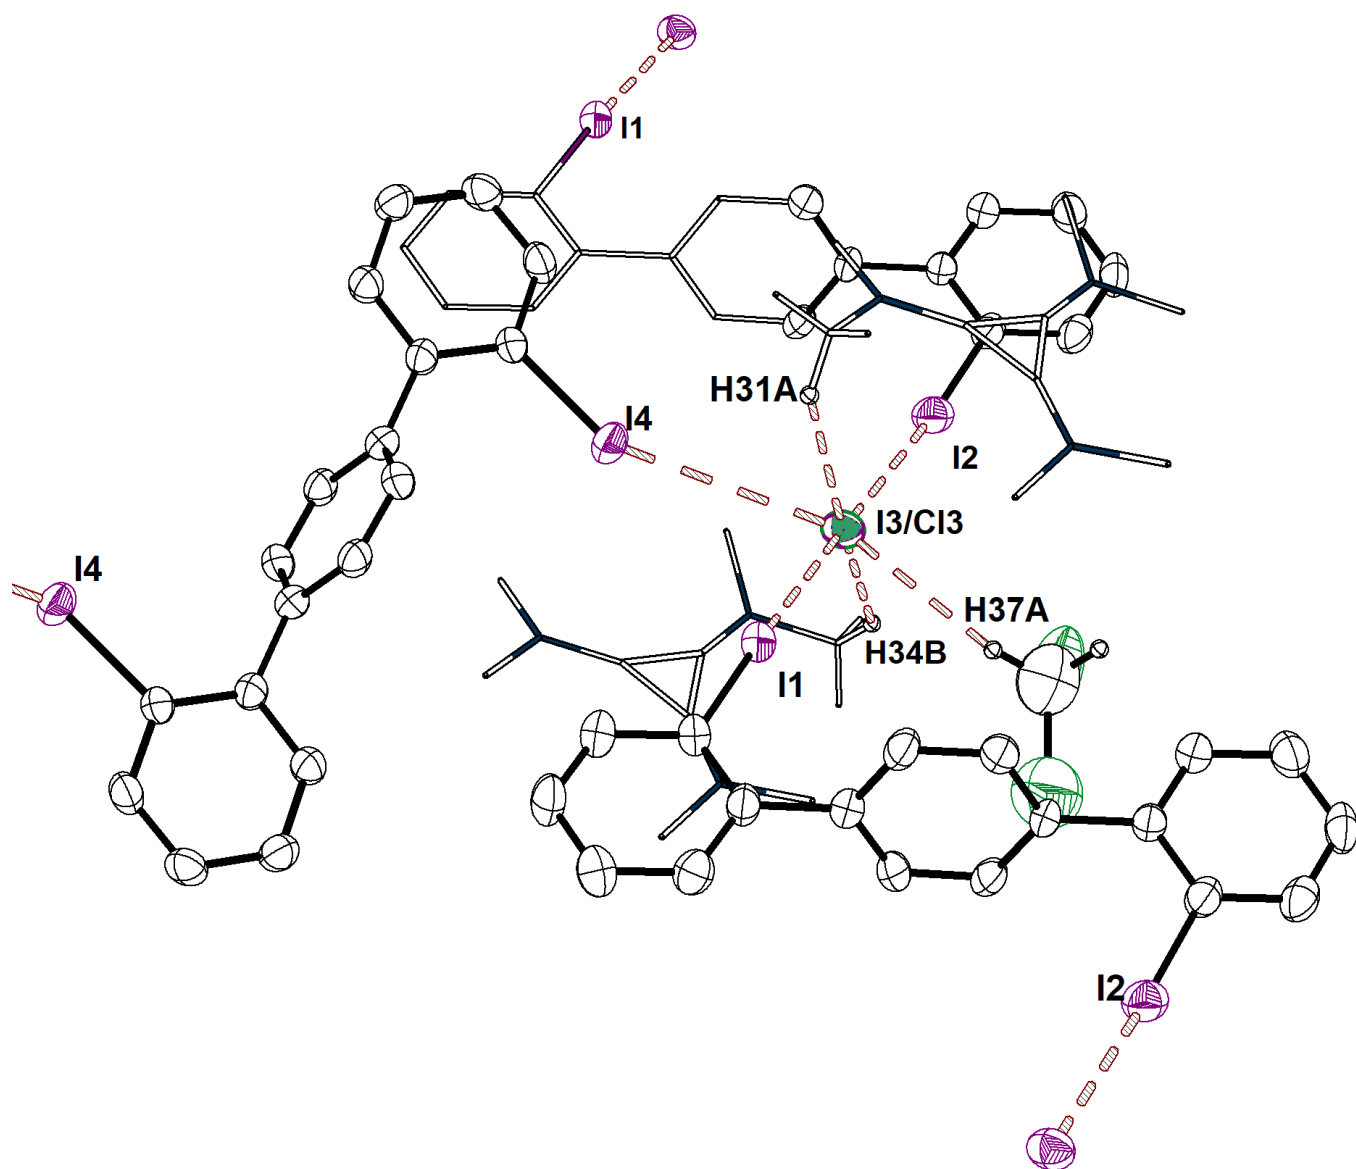

**Figure S8:** Cocrystal structure of *anti-p-1* and TDA-I. Iodide is replaced by chloride in about 40%. A solution with only iodide has a much larger  $R_{int}$ . We speculate that HCl contained in methylene chloride is the cause of the enrichment with chloride.

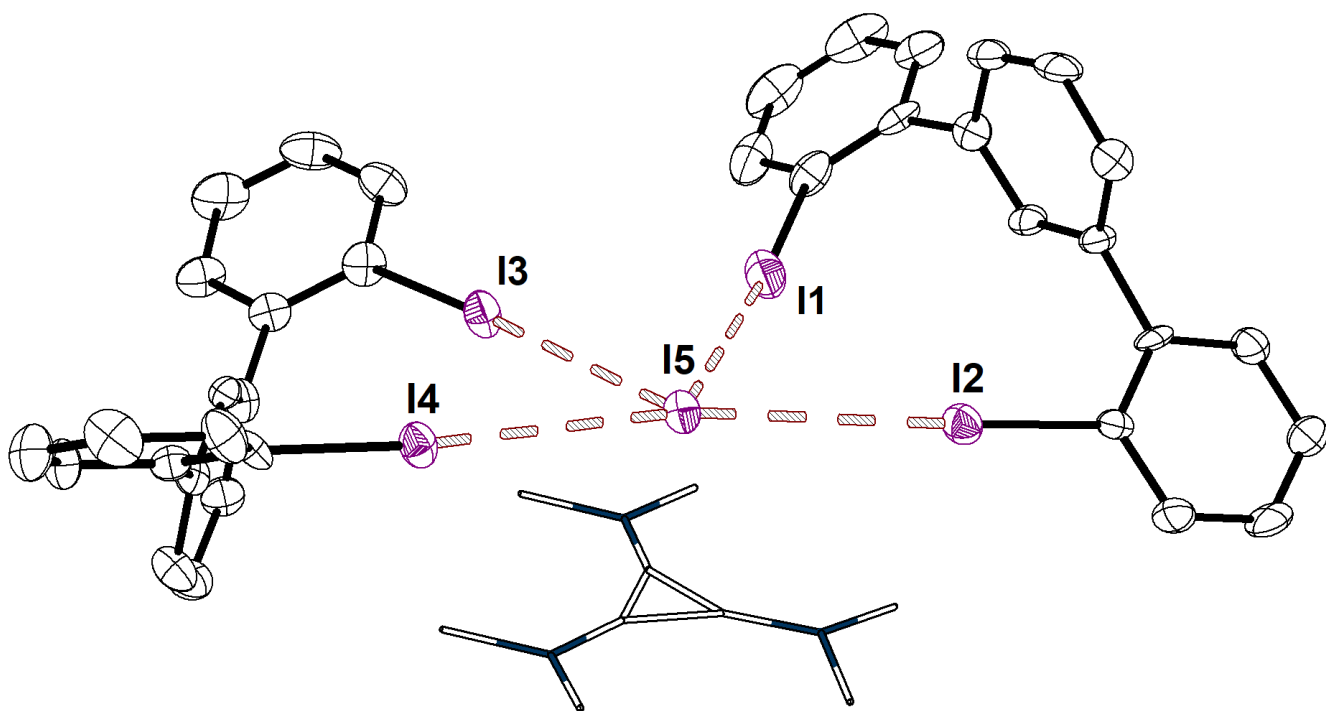

**Figure S9:** Cocrystal structure of *syn-m-1* and TDA-I.

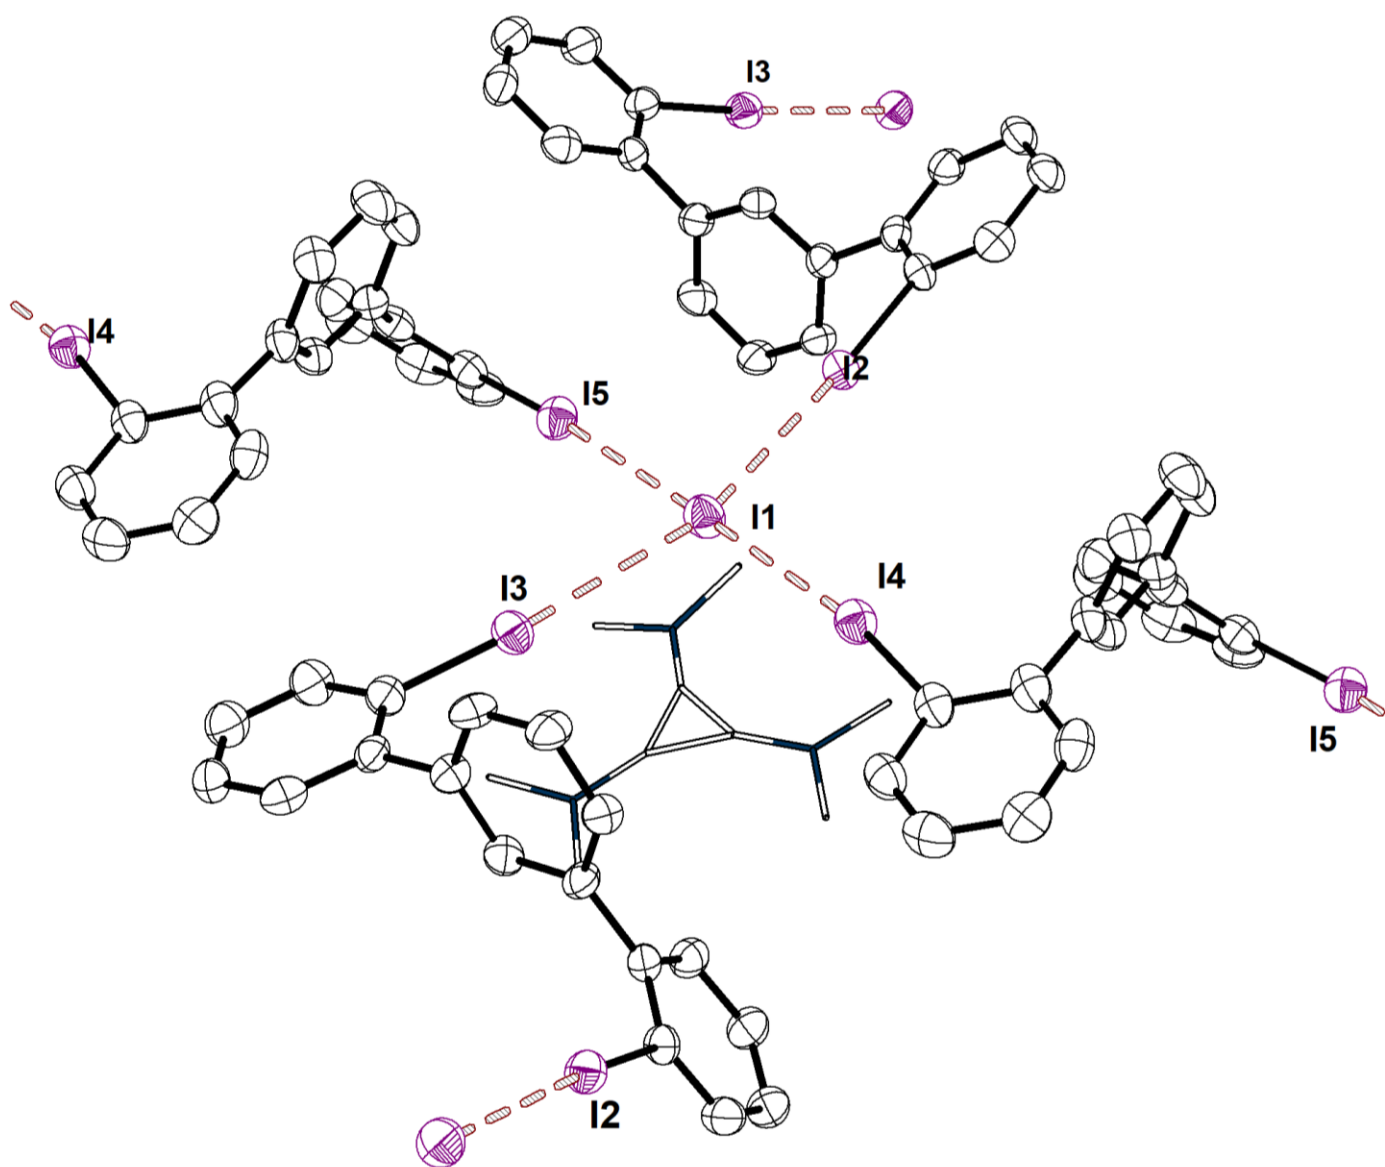

**Figure S10:** Cocrystal structure of *anti-m-1* and TDA-I.

## B Crystal data

**Table S1:** Crystal data and structure refinement

| CCDC No                                              | 2167349                                                  | 2167339                         | 2167342               | 2167336                         | 2167343                                       | 2167344                          | 2167347                                                    | 2167338                         | 2167348                     | 2167340               | 2167345                                       | 2167341                         | 2167337               | 2167346                         |  |
|------------------------------------------------------|----------------------------------------------------------|---------------------------------|-----------------------|---------------------------------|-----------------------------------------------|----------------------------------|------------------------------------------------------------|---------------------------------|-----------------------------|-----------------------|-----------------------------------------------|---------------------------------|-----------------------|---------------------------------|--|
| Compound                                             | syn-p-1                                                  | anti-p-1                        | syn-m-1               | anti-m-1                        | syn-p-1-TDACl                                 | syn-p-1-TDAI                     | anti-p-1-TDACl                                             | anti-p-1-TDABr                  | anti-p-1-TDAI               | syn-m-1-TDACl         | syn-m-1-TEABr                                 | syn-m-1-TDAI                    | anti-m-1-TDACl        | anti-m-1-TDAI                   |  |
| Empirical formula                                    | C18 F12 I2                                               | C18 F12 I2                      | C18 F12 I2            | C18 F12 I2                      | C45 H18 Cl F24 I4 N3                          | C8.18 H3.27 F4.36 I0.91 N0.55 O0 | C74 H40 Cl6 F36 I6 N6                                      | C74 H40 Br2 Cl4 F36 I6 N6       | C74 H40 Cl4.79 F36 I7.21 N6 | C45 H18 Cl F24 I4 N3  | C44 H20 Br F24 I4 N                           | C45 H18 F24 I5 N3               | C45 H18 Cl F24 I4 N3  | C45 H18 F24 I5 N3               |  |
| Formula weight [g/mol]                               | 697.98                                                   | 697.98                          | 697.98                | 697.98                          | 1599.67                                       | 307.48                           | 2671.05                                                    | 2760.14                         | 2781.49                     | 1599.67               | 1606.12                                       | 1691.12                         | 1599.67               | 1691.12                         |  |
| Crystal system                                       | Triclinic                                                | Monoclinic                      | Triclinic             | Monoclinic                      | Triclinic                                     | Monoclinic                       | Triclinic                                                  | Triclinic                       | Triclinic                   | Orthorhombic          | Triclinic                                     | Orthorhombic                    | Monoclinic            | Monoclinic                      |  |
| Space group                                          | P-1 (2)                                                  | P21/n (14)                      | P-1 (2)               | P21/c (14)                      | P-1 (2)                                       | P21/n (14)                       | P-1 (2)                                                    | P-1 (2)                         | P-1 (2)                     | Pbcn (60)             | P-1 (2)                                       | Pbcn (60)                       | Ia (9)                | Pc (7)                          |  |
| Lattice parameters [Å]                               |                                                          |                                 |                       |                                 |                                               |                                  |                                                            |                                 |                             |                       |                                               |                                 |                       |                                 |  |
| a                                                    | 7.7774(4)                                                | 7.6232(9)                       | 8.2040(4)             | 11.8867(10)                     | 9.0859(9)                                     | 7.3349(2)                        | 7.867                                                      | 7.82960(10)                     | 7.84560(10)                 | 15.6729(2)            | 10.2153(4)                                    | 20.5688(18)                     | 25.56024(12)          | 12.59520(10)                    |  |
| b                                                    | 10.5846(6)                                               | 8.0459(7)                       | 10.2959(5)            | 10.7984(11)                     | 10.7062(10)                                   | 33.8687(19)                      | 12.37760(10)                                               | 12.4477(2)                      | 12.5041(3)                  | 20.0722(4)            | 14.8333(6)                                    | 7.5520(4)                       | 8.05461(4)            | 7.87140(10)                     |  |
| c                                                    | 13.0896(5)                                               | 15.3895(17)                     | 12.6309(6)            | 14.7513(11)                     | 25.696(3)                                     | 20.5960(8)                       | 22.96440(10)                                               | 23.1195(2)                      | 23.2075(4)                  | 32.1725(3)            | 33.3212(9)                                    | 65.850(11)                      | 24.62605(10)          | 26.3715(2)                      |  |
| $\alpha$                                             | 106.273(4)                                               | 90                              | 77.925(4)             | 90                              | 82.495(8)                                     | 90                               | 75.6600(10)                                                | 76.3010(10)                     | 76.694(2)                   | 90                    | 80.102(3)                                     | 90                              | 90                    | 90                              |  |
| $\beta$                                              | 98.342(4)                                                | 101.119(11)                     | 86.254(4)             | 91.235(7)                       | 89.647(8)                                     | 91.808(3)                        | 82.4300(10)                                                | 81.9550(10)                     | 81.5980(10)                 | 90                    | 89.936(3)                                     | 90                              | 91.1507(4)            | 97.1660(10)                     |  |
| $\gamma$                                             | 110.384(5)                                               | 90                              | 68.455(5)             | 90                              | 86.629(8)                                     | 90                               | 88.6400(10)                                                | 88.1070(10)                     | 88.0240(10)                 | 90                    | 85.987(3)                                     | 90                              | 90                    | 90                              |  |
| Density [g/cm <sup>3</sup> ]                         | 2.483                                                    | 2.503                           | 2.389                 | 2.449                           | 2.147                                         | 2.196                            | 2.066                                                      | 2.114                           | 2.107                       | 2.1                   | 2.15                                          | 2.196                           | 2.096                 | 2.165                           |  |
| Crystal size [mm <sup>3</sup> ]                      | 0.5 x 0.2 x 0.2                                          | 0.42 x 0.21 x 0.2               | 0.401 x 0.272 x 0.174 | 0.5 x 0.43 x 0.41               | 0.241 x 0.170 x 0.170                         | 1.004 x 0.054 x 0.035            | 0.310 x 0.165 x 0.089                                      | 0.215 x 0.091 x 0.049           | 0.096 x 0.050 x 0.041       | 0.246 x 0.171 x 0.102 | 0.221 x 0.155 x 0.065                         | 0.084 x 0.052 x 0.032           | 0.336 x 0.154 x 0.118 | 0.177 x 0.096 x 0.093           |  |
| Volume [Å <sup>3</sup> ]                             | 933.67(9)                                                | 926.21(18)                      | 970.32(9)             | 1893.0(3)                       | 2473.9(4)                                     | 5114.0(4)                        | 2147.50(2)                                                 | 2167.60(5)                      | 2191.81(7)                  | 10121.1(3)            | 4961.4(3)                                     | 10228.8(19)                     | 5068.93(4)            | 2594.10(4)                      |  |
| Z                                                    | 2                                                        | 2                               | 2                     | 4                               | 2                                             | 22                               | 1                                                          | 1                               | 1                           | 8                     | 4                                             | 8                               | 4                     | 2                               |  |
| Temperature [K]                                      | 170(2)                                                   | 170(2)                          | 170(2)                | 170(2)                          | 170(2)                                        | 170.0(7)                         | 169.99(10)                                                 | 169.99(10)                      | 169.99(10)                  | 170.00(14)            | 170.00(14)                                    | 170.00(14)                      | 170.00(10)            | 170.02(14)                      |  |
| Diffraction Device                                   | Xcalibur, Sapphire2, large Be window                     |                                 |                       |                                 | SuperNova, Single source at offset/far, Atlas |                                  |                                                            | XtaLAB Synergy, Dualflex, HyPix |                             |                       | SuperNova, Single source at offset/far, Atlas |                                 |                       | XtaLAB Synergy, Dualflex, HyPix |  |
| Radiation Type                                       | 0.7107 Å ( Mo K $\alpha$ / fine-focus sealed X-ray tube) |                                 |                       |                                 |                                               |                                  | 1.54184 Å ( Cu K $\alpha$ / micro-focus sealed X-ray tube) |                                 |                             |                       |                                               |                                 |                       |                                 |  |
| F(000)                                               | 644                                                      | 644                             | 644                   | 1288                            | 1508                                          | 3160                             | 1270                                                       | 1306                            | 1313                        | 6032                  | 3016                                          | 6320                            | 3016                  | 1580                            |  |
| Absorption coefficient [mm <sup>-1</sup> ]           | 3.488                                                    | 3.516                           | 3.357                 | 3.441                           | 21.47                                         | 25.032                           | 19.897                                                     | 20.225                          | 22.491                      | 20.991                | 21.824                                        | 25.03                           | 20.957                | 24.674                          |  |
| Absorption correction                                | Semi-empirical from equivalents                          | Semi-empirical from equivalents | Analytical            | Semi-empirical from equivalents | Sphere                                        | Sphere                           | Gaussian                                                   | Gaussian                        | Gaussian                    | Gaussian              | Gaussian                                      | Semi-empirical from equivalents | Gaussian              | Gaussian                        |  |
| Measurement range                                    | 3.2 - 27.5                                               | 3.3 - 25.0                      | 3.4 - 25.0            | 2.9 - 26.6                      | 3.5 - 74.4                                    | 3.4 - 66.5                       | 3.7 - 66.5                                                 | 3.7 - 66.5                      | 3.6 - 66.5                  | 3.6 - 66.5            | 3.5 - 66.5                                    | 3.4 - 66.5                      | 3.5 - 66.5            | 3.4 - 66.5                      |  |
| Index range                                          | -10 < h < 10                                             | -8 < h < 8                      | -9 < h < 9            | -14 < h < 14                    | -11 < h < 7                                   | -8 < h < 8                       | -9 < h < 9                                                 | -9 < h < 9                      | -9 < h < 8                  | -18 < h < 14          | -12 < h < 12                                  | -24 < h < 23                    | -29 < h < 30          | -14 < h < 14                    |  |
|                                                      | -13 < k < 13                                             | -8 < k < 9                      | -12 < k < 12          | -13 < k < 13                    | -11 < k < 13                                  | -40 < k < 40                     | -14 < k < 14                                               | -14 < k < 11                    | -14 < k < 14                | -23 < k < 23          | -17 < k < 17                                  | -6 < k < 8                      | -9 < k < 9            | -9 < k < 8                      |  |
|                                                      | -16 < l < 16                                             | -17 < l < 18                    | -14 < l < 14          | -18 < l < 18                    | -31 < l < 32                                  | -23 < l < 24                     | -27 < l < 27                                               | -27 < l < 27                    | -27 < l < 23                | -37 < l < 38          | -39 < l < 39                                  | -77 < l < 78                    | -29 < l < 28          | -31 < l < 31                    |  |
| Measured reflexes                                    | 16217                                                    | 6649                            | 18900                 | 15844                           | 15445                                         | 29426                            | 56202                                                      | 24385                           | 24971                       | 54556                 | 77496                                         | 56470                           | 34691                 | 26783                           |  |
| Independent                                          | 4251                                                     | 1589                            | 3401                  | 3893                            | 9624                                          | 8988                             | 7555                                                       | 7603                            | 7727                        | 8895                  | 17224                                         | 8956                            | 7403                  | 8240                            |  |
| Observed                                             | 3498                                                     | 1293                            | 2936                  | 3200                            | 7353                                          | 7186                             | 7249                                                       | 6984                            | 7110                        | 7291                  | 14454                                         | 7859                            | 7357                  | 8140                            |  |
| R(int)                                               | 0.0363                                                   | 0.0402                          | 0.0232                | 0.0751                          | 0.0482                                        | 0.0502                           | 0.0479                                                     | 0.0445                          | 0.0437                      | 0.0499                | 0.0605                                        | 0.072                           | 0.0424                | 0.0401                          |  |
| Completeness (%) / theta (°)                         | 99.8 / 25.242                                            | 97.7 / 24.986                   | 99.6 / 24.985         | 99.4 / 25.242                   | 99.0 / 67.684                                 | 99.7 / 66.500                    | 99.7 / 66.494                                              | 99.4 / 66.496                   | 99.9 / 66.500               | 99.6 / 66.499         | 98.5 / 66.497                                 | 99.5 / 66.500                   | 100.0 / 66.499        | 100.0 / 66.482                  |  |
| Transmission (min / max)                             | 0.66631 / 1.00000                                        | 0.70796 / 1.00000               | 0.457 / 0.667         | 0.46411 / 1.00000               | 0.12796 / 0.22666                             | 0.20281 / 0.29134                | 0.019 / 0.674                                              | 0.113 / 0.839                   | 0.182 / 0.579               | 0.238 / 0.590         | 0.038 / 0.536                                 | 0.17745 / 1.00000               | 0.012 / 0.390         | 0.164 / 0.451                   |  |
| R1 (observed/all)                                    | 0.0263 / 0.0377                                          | 0.0400 / 0.0537                 | 0.0329 / 0.0389       | 0.0448 / 0.0551                 | 0.0516 / 0.0694                               | 0.0337 / 0.0475                  | 0.0322 / 0.0332                                            | 0.0329 / 0.0355                 | 0.0444 / 0.0476             | 0.0469 / 0.0612       | 0.0480 / 0.0581                               | 0.0541 / 0.0631                 | 0.0323 / 0.0324       | 0.0408 / 0.0411                 |  |
| wR2 (observed/all)                                   | 0.0545 / 0.0592                                          | 0.1024 / 0.1135                 | 0.0780 / 0.0816       | 0.1107 / 0.1208                 | 0.1288 / 0.1432                               | 0.0726 / 0.0802                  | 0.0847 / 0.0855                                            | 0.0855 / 0.0870                 | 0.1020 / 0.1035             | 0.1064 / 0.1189       | 0.1230 / 0.1286                               | 0.1011 / 0.1046                 | 0.0798 / 0.0798       | 0.1034 / 0.1039                 |  |
| Goof = S                                             | 1.039                                                    | 1.111                           | 1.065                 | 1.035                           | 1.004                                         | 1.032                            | 1.033                                                      | 1.014                           | 1.133                       | 1.175                 | 1.085                                         | 1.207                           | 1.034                 | 1.019                           |  |
| Rest electron density max./min. [e-Å <sup>-3</sup> ] | -0.382 / 0.628                                           | -0.819 / 1.051                  | -0.758 / 1.234        | -0.91 / 1.626                   | -1.296 / 1.395                                | -0.773 / 0.961                   | -0.943 / 1.496                                             | -0.81 / 0.867                   | -1.352 / 1.344              | -1.16 / 1.04          | -0.944 / 1.6                                  | -1.192 / 1.149                  | -0.903 / 1.233        | -2.11 / 1.071                   |  |

**Table S2.** Atomic coordinates and equivalent isotropic displacement parameters [Å<sup>2</sup>] for **syn-p1**

|       | x          | y           | z           | U(eq)      |
|-------|------------|-------------|-------------|------------|
| I(1)  | 1.14930(3) | 0.92541(2)  | 0.92068(2)  | 0.03622(8) |
| I(2)  | 0.43172(3) | 0.65519(2)  | 0.95802(2)  | 0.03687(8) |
| F(1)  | 0.9212(3)  | 0.6135(2)   | 0.48327(14) | 0.0372(5)  |
| F(2)  | 1.2413(3)  | 0.7745(2)   | 0.44545(15) | 0.0430(5)  |
| F(3)  | 1.5203(2)  | 1.0003(2)   | 0.61468(16) | 0.0370(5)  |
| F(4)  | 1.4798(2)  | 1.0635(2)   | 0.82038(15) | 0.0396(5)  |
| F(5)  | 0.6853(2)  | 0.7937(2)   | 0.64389(18) | 0.0400(5)  |
| F(6)  | 0.3717(2)  | 0.62914(19) | 0.68118(17) | 0.0351(4)  |
| F(7)  | 0.6818(2)  | 0.34896(19) | 0.77175(16) | 0.0326(4)  |
| F(8)  | 0.9975(2)  | 0.5169(2)   | 0.73659(16) | 0.0347(4)  |
| F(9)  | 0.2891(3)  | 0.20084(18) | 0.58922(15) | 0.0352(4)  |
| F(10) | -0.0217(3) | 0.02966(19) | 0.62705(17) | 0.0436(5)  |
| F(11) | -0.1241(3) | 0.1262(2)   | 0.81424(18) | 0.0469(5)  |
| F(12) | 0.0760(3)  | 0.3962(2)   | 0.95678(17) | 0.0479(5)  |
| C(1)  | 1.0300(4)  | 0.7539(3)   | 0.6730(2)   | 0.0217(6)  |
| C(2)  | 1.0565(4)  | 0.7256(3)   | 0.5686(2)   | 0.0247(6)  |
| C(3)  | 1.2194(4)  | 0.8062(3)   | 0.5478(2)   | 0.0260(6)  |
| C(4)  | 1.3620(4)  | 0.9210(3)   | 0.6338(3)   | 0.0268(7)  |
| C(5)  | 1.3381(4)  | 0.9514(3)   | 0.7387(3)   | 0.0258(6)  |
| C(6)  | 1.1740(4)  | 0.8701(3)   | 0.7598(2)   | 0.0229(6)  |
| C(7)  | 0.8512(4)  | 0.6603(3)   | 0.6902(2)   | 0.0215(6)  |
| C(8)  | 0.6872(4)  | 0.6848(3)   | 0.6762(3)   | 0.0247(6)  |
| C(9)  | 0.5244(4)  | 0.5984(3)   | 0.6948(3)   | 0.0250(6)  |
| C(10) | 0.5180(4)  | 0.4853(3)   | 0.7287(2)   | 0.0210(6)  |
| C(11) | 0.6811(4)  | 0.4587(3)   | 0.7405(2)   | 0.0223(6)  |
| C(12) | 0.8432(4)  | 0.5455(3)   | 0.7219(2)   | 0.0220(6)  |
| C(13) | 0.3460(4)  | 0.3946(3)   | 0.7532(2)   | 0.0206(6)  |
| C(14) | 0.2397(4)  | 0.2535(3)   | 0.6814(2)   | 0.0250(6)  |
| C(15) | 0.0813(4)  | 0.1637(3)   | 0.7004(3)   | 0.0291(7)  |
| C(16) | 0.0274(4)  | 0.2135(3)   | 0.7947(3)   | 0.0310(7)  |
| C(17) | 0.1306(4)  | 0.3523(4)   | 0.8662(3)   | 0.0290(7)  |
| C(18) | 0.2878(4)  | 0.4443(3)   | 0.8465(2)   | 0.0226(6)  |

**Table S3.** Anisotropic displacement parameters [Å<sup>2</sup>] for **syn-p-1**

|       | U11         | U22         | U33         | U23        | U13         | U12         |
|-------|-------------|-------------|-------------|------------|-------------|-------------|
| I(1)  | 0.03648(13) | 0.03559(13) | 0.02640(12) | 0.00274(9) | 0.01348(9)  | 0.00776(10) |
| I(2)  | 0.04432(14) | 0.02716(12) | 0.03012(13) | 0.00049(9) | 0.00216(10) | 0.01517(10) |
| F(1)  | 0.0319(10)  | 0.0329(10)  | 0.0250(10)  | 0.0032(8)  | 0.0013(8)   | -0.0033(8)  |
| F(2)  | 0.0466(12)  | 0.0469(12)  | 0.0251(10)  | 0.0109(9)  | 0.0172(9)   | 0.0058(10)  |
| F(3)  | 0.0270(10)  | 0.0350(11)  | 0.0440(12)  | 0.0177(9)  | 0.0167(8)   | 0.0013(8)   |
| F(4)  | 0.0268(10)  | 0.0304(10)  | 0.0343(11)  | -0.0014(8) | 0.0054(8)   | -0.0080(8)  |
| F(5)  | 0.0271(10)  | 0.0328(11)  | 0.0732(15)  | 0.0371(10) | 0.0163(10)  | 0.0116(8)   |
| F(6)  | 0.0182(9)   | 0.0330(10)  | 0.0623(13)  | 0.0280(10) | 0.0107(8)   | 0.0111(8)   |
| F(7)  | 0.0318(10)  | 0.0286(10)  | 0.0509(12)  | 0.0266(9)  | 0.0174(9)   | 0.0156(8)   |
| F(8)  | 0.0227(9)   | 0.0386(11)  | 0.0565(13)  | 0.0277(10) | 0.0171(9)   | 0.0172(8)   |
| F(9)  | 0.0400(11)  | 0.0229(9)   | 0.0316(10)  | 0.0020(8)  | 0.0149(8)   | 0.0041(8)   |
| F(10) | 0.0352(11)  | 0.0216(10)  | 0.0531(13)  | 0.0075(9)  | 0.0048(9)   | -0.0047(8)  |
| F(11) | 0.0277(10)  | 0.0506(13)  | 0.0682(15)  | 0.0364(12) | 0.0233(10)  | 0.0066(9)   |
| F(12) | 0.0492(12)  | 0.0583(14)  | 0.0476(13)  | 0.0211(11) | 0.0329(10)  | 0.0256(11)  |
| C(1)  | 0.0176(14)  | 0.0194(14)  | 0.0292(16)  | 0.0108(12) | 0.0083(12)  | 0.0064(12)  |
| C(2)  | 0.0224(15)  | 0.0205(15)  | 0.0238(15)  | 0.0055(12) | 0.0023(12)  | 0.0037(12)  |
| C(3)  | 0.0269(16)  | 0.0292(17)  | 0.0222(15)  | 0.0109(13) | 0.0096(12)  | 0.0092(13)  |
| C(4)  | 0.0199(15)  | 0.0238(16)  | 0.0362(18)  | 0.0136(13) | 0.0115(13)  | 0.0044(12)  |
| C(5)  | 0.0200(15)  | 0.0191(15)  | 0.0292(16)  | 0.0045(12) | 0.0037(12)  | 0.0022(12)  |
| C(6)  | 0.0222(15)  | 0.0211(15)  | 0.0244(15)  | 0.0079(12) | 0.0081(12)  | 0.0074(12)  |
| C(7)  | 0.0188(14)  | 0.0165(14)  | 0.0232(15)  | 0.0055(11) | 0.0051(11)  | 0.0019(11)  |
| C(8)  | 0.0229(15)  | 0.0165(14)  | 0.0352(17)  | 0.0133(13) | 0.0061(13)  | 0.0060(12)  |
| C(9)  | 0.0162(14)  | 0.0231(15)  | 0.0338(17)  | 0.0111(13) | 0.0036(12)  | 0.0064(12)  |
| C(10) | 0.0191(14)  | 0.0161(14)  | 0.0238(15)  | 0.0053(11) | 0.0044(11)  | 0.0046(11)  |
| C(11) | 0.0237(15)  | 0.0163(14)  | 0.0281(16)  | 0.0109(12) | 0.0083(12)  | 0.0066(12)  |
| C(12) | 0.0172(14)  | 0.0243(15)  | 0.0233(15)  | 0.0076(12) | 0.0062(11)  | 0.0076(12)  |
| C(13) | 0.0183(14)  | 0.0176(14)  | 0.0263(15)  | 0.0107(12) | 0.0052(11)  | 0.0058(11)  |
| C(14) | 0.0261(16)  | 0.0233(15)  | 0.0238(15)  | 0.0081(12) | 0.0062(12)  | 0.0085(13)  |
| C(15) | 0.0217(15)  | 0.0192(15)  | 0.0373(18)  | 0.0100(13) | 0.0014(13)  | 0.0008(12)  |
| C(16) | 0.0161(15)  | 0.0303(17)  | 0.049(2)    | 0.0257(16) | 0.0079(14)  | 0.0033(13)  |
| C(17) | 0.0270(16)  | 0.0390(19)  | 0.0323(17)  | 0.0192(15) | 0.0157(14)  | 0.0182(15)  |
| C(18) | 0.0189(14)  | 0.0190(14)  | 0.0283(16)  | 0.0090(12) | 0.0029(12)  | 0.0068(12)  |



**Table S4.** Atomic coordinates and equivalent isotropic displacement parameters [Å<sup>2</sup>] for **anti-p-1**

|        | x          | y          | z          | U(eq)      |
|--------|------------|------------|------------|------------|
| I(001) | 0.09777(6) | 0.98643(5) | 0.27621(3) | 0.0486(2)  |
| F(1)   | -0.1154(5) | 0.6512(5)  | 0.2416(3)  | 0.0575(11) |
| F(2)   | -0.0967(6) | 0.3624(5)  | 0.3283(3)  | 0.0627(12) |
| F(3)   | 0.1498(6)  | 0.3189(5)  | 0.4791(3)  | 0.0631(12) |
| F(4)   | 0.3709(6)  | 0.5685(5)  | 0.5442(3)  | 0.0543(10) |
| F(5)   | 0.5675(5)  | 0.8093(5)  | 0.3656(2)  | 0.0521(10) |
| F(6)   | 0.1967(6)  | 0.9574(5)  | 0.5636(3)  | 0.0523(10) |
| C(1)   | 0.1201(8)  | 0.7652(7)  | 0.3477(4)  | 0.0333(13) |
| C(2)   | 0.0061(8)  | 0.6364(8)  | 0.3159(4)  | 0.0384(15) |
| C(3)   | 0.0158(9)  | 0.4861(7)  | 0.3602(5)  | 0.0407(16) |
| C(4)   | 0.1416(10) | 0.4650(7)  | 0.4365(5)  | 0.0417(16) |
| C(5)   | 0.2539(9)  | 0.5938(8)  | 0.4693(4)  | 0.0402(15) |
| C(6)   | 0.2470(8)  | 0.7444(7)  | 0.4255(4)  | 0.0343(14) |
| C(7)   | 0.3770(8)  | 0.8757(7)  | 0.4634(4)  | 0.0349(14) |
| C(8)   | 0.5326(8)  | 0.9035(8)  | 0.4323(4)  | 0.0358(14) |
| C(9)   | 0.3476(9)  | 0.9776(7)  | 0.5314(4)  | 0.0349(14) |

**Table S5.** Anisotropic displacement parameters [Å<sup>2</sup>] for **anti-p-1**

|        | U11       | U22       | U33       | U23         | U13        | U12          |
|--------|-----------|-----------|-----------|-------------|------------|--------------|
| I(001) | 0.0538(4) | 0.0410(3) | 0.0475(3) | 0.01032(18) | 0.0012(2)  | -0.00020(19) |
| F(1)   | 0.051(3)  | 0.051(2)  | 0.059(3)  | -0.0037(19) | -0.020(2)  | -0.0067(18)  |
| F(2)   | 0.063(3)  | 0.037(2)  | 0.083(3)  | -0.012(2)   | 0.002(2)   | -0.0168(19)  |
| F(3)   | 0.078(3)  | 0.032(2)  | 0.079(3)  | 0.0131(19)  | 0.015(2)   | 0.0015(19)   |
| F(4)   | 0.062(3)  | 0.052(2)  | 0.041(2)  | 0.0104(18)  | -0.007(2)  | 0.005(2)     |
| F(5)   | 0.053(3)  | 0.060(2)  | 0.046(2)  | -0.0228(19) | 0.0161(19) | -0.0120(19)  |
| F(6)   | 0.044(3)  | 0.063(2)  | 0.055(2)  | -0.014(2)   | 0.019(2)   | -0.0148(19)  |
| C(1)   | 0.037(4)  | 0.032(3)  | 0.032(3)  | -0.001(2)   | 0.009(3)   | 0.000(3)     |
| C(2)   | 0.034(4)  | 0.037(3)  | 0.040(4)  | -0.003(3)   | -0.001(3)  | 0.001(3)     |
| C(3)   | 0.039(4)  | 0.030(3)  | 0.054(4)  | -0.011(3)   | 0.010(3)   | -0.003(3)    |
| C(4)   | 0.048(4)  | 0.028(3)  | 0.050(4)  | 0.004(3)    | 0.012(3)   | 0.002(3)     |
| C(5)   | 0.042(4)  | 0.046(4)  | 0.029(3)  | 0.002(3)    | -0.001(3)  | 0.004(3)     |
| C(6)   | 0.035(4)  | 0.032(3)  | 0.036(3)  | -0.002(2)   | 0.008(3)   | -0.001(3)    |
| C(7)   | 0.035(4)  | 0.037(3)  | 0.028(3)  | -0.001(2)   | -0.004(3)  | -0.005(3)    |
| C(8)   | 0.033(4)  | 0.041(3)  | 0.033(3)  | -0.008(3)   | 0.006(3)   | -0.002(3)    |
| C(9)   | 0.029(3)  | 0.040(3)  | 0.036(3)  | 0.005(3)    | 0.005(3)   | -0.002(3)    |

**Table S6.** Atomic coordinates and equivalent isotropic displacement parameters  
[Å<sup>2</sup>] **syn-m-1**

|       | x           | y          | z           | U(eq)       |
|-------|-------------|------------|-------------|-------------|
| I(1)  | -0.20537(5) | 0.82579(4) | 0.32762(4)  | 0.08125(15) |
| I(2)  | 0.22466(4)  | 0.87369(3) | -0.01023(3) | 0.06117(13) |
| F(1)  | -0.2705(4)  | 0.9358(3)  | 0.5456(3)   | 0.0895(10)  |
| F(2)  | -0.0573(5)  | 0.9194(3)  | 0.7037(2)   | 0.0953(12)  |
| F(3)  | 0.2933(5)   | 0.7764(3)  | 0.6941(3)   | 0.0949(12)  |
| F(4)  | 0.4255(4)   | 0.6517(3)  | 0.5267(2)   | 0.0764(9)   |
| F(5)  | 0.1054(4)   | 0.4742(3)  | 0.4137(2)   | 0.0633(7)   |
| F(6)  | 0.2634(4)   | 0.3325(3)  | 0.2574(2)   | 0.0660(7)   |
| F(7)  | 0.4758(4)   | 0.4287(3)  | 0.1175(2)   | 0.0591(7)   |
| F(8)  | 0.3711(3)   | 0.8118(2)  | 0.2909(2)   | 0.0529(6)   |
| F(9)  | 0.7943(3)   | 0.5016(3)  | 0.2262(2)   | 0.0650(7)   |
| F(10) | 1.0190(3)   | 0.5758(4)  | 0.0866(3)   | 0.0746(8)   |
| F(11) | 0.8994(4)   | 0.7826(3)  | -0.0910(2)  | 0.0702(8)   |
| F(12) | 0.5538(4)   | 0.9186(3)  | -0.1291(2)  | 0.0639(7)   |
| C(1)  | -0.0326(6)  | 0.7997(4)  | 0.4500(3)   | 0.0481(10)  |
| C(2)  | -0.0985(7)  | 0.8629(5)  | 0.5385(4)   | 0.0593(13)  |
| C(3)  | 0.0089(8)   | 0.8558(5)  | 0.6206(4)   | 0.0634(14)  |
| C(4)  | 0.1851(8)   | 0.7841(5)  | 0.6160(4)   | 0.0644(14)  |
| C(5)  | 0.2544(6)   | 0.7196(4)  | 0.5294(3)   | 0.0540(11)  |
| C(6)  | 0.1481(5)   | 0.7244(4)  | 0.4456(3)   | 0.0424(9)   |
| C(7)  | 0.2315(5)   | 0.6495(4)  | 0.3556(3)   | 0.0389(8)   |
| C(8)  | 0.2083(5)   | 0.5253(4)  | 0.3445(3)   | 0.0445(9)   |
| C(9)  | 0.2896(6)   | 0.4519(4)  | 0.2655(3)   | 0.0438(9)   |
| C(10) | 0.3984(5)   | 0.5005(4)  | 0.1952(3)   | 0.0409(9)   |
| C(11) | 0.4282(5)   | 0.6229(4)  | 0.2010(3)   | 0.0369(8)   |
| C(12) | 0.3438(5)   | 0.6933(4)  | 0.2826(3)   | 0.0398(9)   |
| C(13) | 0.5490(5)   | 0.6723(4)  | 0.1236(3)   | 0.0373(8)   |
| C(14) | 0.7287(5)   | 0.6063(5)  | 0.1408(3)   | 0.0461(10)  |
| C(15) | 0.8457(5)   | 0.6439(5)  | 0.0690(4)   | 0.0501(10)  |
| C(16) | 0.7851(5)   | 0.7486(5)  | -0.0211(3)  | 0.0466(10)  |
| C(17) | 0.6076(5)   | 0.8168(4)  | -0.0396(3)  | 0.0432(9)   |
| C(18) | 0.4892(5)   | 0.7793(4)  | 0.0312(3)   | 0.0383(8)   |

**Table S7.** Anisotropic displacement parameters [ $\text{\AA}^2$ ] for **syn-m-1**

|       | U11         | U22        | U33        | U23          | U13          | U12          |
|-------|-------------|------------|------------|--------------|--------------|--------------|
| I(1)  | 0.0550(2)   | 0.0795(3)  | 0.1049(3)  | -0.0235(2)   | -0.01573(19) | -0.01385(18) |
| I(2)  | 0.03645(17) | 0.0617(2)  | 0.0749(2)  | -0.00622(16) | -0.00598(13) | -0.00865(13) |
| F(1)  | 0.0670(19)  | 0.076(2)   | 0.117(3)   | -0.0348(19)  | 0.0440(19)   | -0.0153(16)  |
| F(2)  | 0.152(3)    | 0.0659(19) | 0.0558(18) | -0.0278(15)  | 0.0445(19)   | -0.023(2)    |
| F(3)  | 0.139(3)    | 0.073(2)   | 0.0576(19) | -0.0252(16)  | -0.0309(19)  | -0.009(2)    |
| F(4)  | 0.0627(18)  | 0.083(2)   | 0.0730(19) | -0.0323(16)  | -0.0209(14)  | -0.0020(15)  |
| F(5)  | 0.0812(19)  | 0.0565(15) | 0.0610(16) | -0.0124(12)  | 0.0306(14)   | -0.0397(14)  |
| F(6)  | 0.095(2)    | 0.0533(15) | 0.0692(17) | -0.0238(13)  | 0.0217(15)   | -0.0469(15)  |
| F(7)  | 0.0795(18)  | 0.0597(15) | 0.0511(15) | -0.0301(12)  | 0.0221(13)   | -0.0335(14)  |
| F(8)  | 0.0592(15)  | 0.0481(13) | 0.0642(16) | -0.0270(12)  | 0.0201(12)   | -0.0288(12)  |
| F(9)  | 0.0493(15)  | 0.0635(16) | 0.0669(17) | 0.0112(13)   | -0.0161(12)  | -0.0131(13)  |
| F(10) | 0.0317(13)  | 0.100(2)   | 0.085(2)   | -0.0163(17)  | -0.0011(13)  | -0.0163(14)  |
| F(11) | 0.0578(16)  | 0.104(2)   | 0.0629(17) | -0.0151(15)  | 0.0187(13)   | -0.0488(16)  |
| F(12) | 0.0657(17)  | 0.0666(17) | 0.0535(15) | 0.0096(13)   | -0.0021(12)  | -0.0282(14)  |
| C(1)  | 0.051(2)    | 0.041(2)   | 0.050(2)   | -0.0062(19)  | 0.0119(19)   | -0.0170(19)  |
| C(2)  | 0.064(3)    | 0.041(2)   | 0.065(3)   | -0.010(2)    | 0.032(3)     | -0.016(2)    |
| C(3)  | 0.097(4)    | 0.040(2)   | 0.041(3)   | -0.0083(19)  | 0.023(3)     | -0.015(3)    |
| C(4)  | 0.104(4)    | 0.043(2)   | 0.035(2)   | -0.0056(19)  | -0.006(2)    | -0.015(3)    |
| C(5)  | 0.069(3)    | 0.040(2)   | 0.043(2)   | -0.0113(19)  | -0.001(2)    | -0.006(2)    |
| C(6)  | 0.050(2)    | 0.037(2)   | 0.039(2)   | -0.0065(17)  | 0.0070(17)   | -0.0149(18)  |
| C(7)  | 0.043(2)    | 0.040(2)   | 0.032(2)   | -0.0089(16)  | 0.0052(16)   | -0.0127(17)  |
| C(8)  | 0.044(2)    | 0.046(2)   | 0.042(2)   | -0.0083(18)  | 0.0035(18)   | -0.0159(19)  |
| C(9)  | 0.053(2)    | 0.041(2)   | 0.043(2)   | -0.0090(18)  | 0.0031(18)   | -0.0244(19)  |
| C(10) | 0.049(2)    | 0.043(2)   | 0.033(2)   | -0.0140(17)  | 0.0044(17)   | -0.0170(18)  |
| C(11) | 0.038(2)    | 0.038(2)   | 0.035(2)   | -0.0087(16)  | 0.0052(15)   | -0.0143(16)  |
| C(12) | 0.041(2)    | 0.0360(19) | 0.045(2)   | -0.0109(17)  | 0.0015(17)   | -0.0160(16)  |
| C(13) | 0.037(2)    | 0.039(2)   | 0.040(2)   | -0.0152(16)  | 0.0058(16)   | -0.0155(16)  |
| C(14) | 0.043(2)    | 0.052(2)   | 0.045(2)   | -0.0098(19)  | 0.0009(18)   | -0.0189(19)  |
| C(15) | 0.033(2)    | 0.067(3)   | 0.054(3)   | -0.020(2)    | -0.0012(18)  | -0.0171(19)  |
| C(16) | 0.044(2)    | 0.060(3)   | 0.047(2)   | -0.017(2)    | 0.0100(18)   | -0.030(2)    |
| C(17) | 0.050(2)    | 0.046(2)   | 0.039(2)   | -0.0112(18)  | 0.0022(17)   | -0.0219(19)  |
| C(18) | 0.0336(19)  | 0.040(2)   | 0.044(2)   | -0.0146(17)  | 0.0034(16)   | -0.0137(16)  |

**Table S8.** Atomic coordinates and equivalent isotropic displacement parameters [Å<sup>2</sup>] for **anti-m-1**

|        | x          | y          | z           | U(eq)       |
|--------|------------|------------|-------------|-------------|
| I(1)   | 0.41865(3) | 0.40165(4) | 0.88496(2)  | 0.06158(16) |
| F(1)   | 0.6804(3)  | 0.4477(3)  | 0.9161(2)   | 0.0644(9)   |
| C(1)   | 0.5142(4)  | 0.4984(4)  | 0.7101(3)   | 0.0346(9)   |
| I(2)   | 0.22010(4) | 0.71726(4) | 0.42860(2)  | 0.06040(16) |
| F(2)   | 0.8390(2)  | 0.5328(3)  | 0.8085(2)   | 0.0668(9)   |
| C(2)   | 0.5412(4)  | 0.4666(4)  | 0.7995(3)   | 0.0361(9)   |
| F(003) | 0.3464(2)  | 0.6833(3)  | 0.6990(2)   | 0.0496(7)   |
| F(3)   | 0.7871(3)  | 0.6038(4)  | 0.6360(2)   | 0.0688(10)  |
| C(3)   | 0.6506(4)  | 0.4802(4)  | 0.8313(3)   | 0.0427(11)  |
| F(004) | 0.4456(3)  | 0.2739(3)  | 0.6333(2)   | 0.0548(8)   |
| F(4)   | 0.5764(3)  | 0.5753(3)  | 0.57083(19) | 0.0591(8)   |
| C(4)   | 0.7333(4)  | 0.5232(5)  | 0.7769(3)   | 0.0451(11)  |
| F(005) | 0.0915(2)  | 0.4221(3)  | 0.5457(2)   | 0.0533(7)   |
| F(5)   | 0.0045(3)  | 0.8788(3)  | 0.4576(2)   | 0.0584(8)   |
| C(5)   | 0.7073(4)  | 0.5593(5)  | 0.6898(3)   | 0.0479(12)  |
| F(6)   | -0.1272(3) | 0.9128(3)  | 0.6002(3)   | 0.0657(9)   |
| C(6)   | 0.5985(4)  | 0.5449(5)  | 0.6564(3)   | 0.0409(10)  |
| C(7)   | 0.3208(4)  | 0.5723(4)  | 0.6629(3)   | 0.0350(9)   |
| F(7)   | -0.0902(3) | 0.7840(3)  | 0.7551(2)   | 0.0720(10)  |
| C(8)   | 0.3997(4)  | 0.4811(4)  | 0.6687(3)   | 0.0347(9)   |
| F(8)   | 0.0723(3)  | 0.6090(3)  | 0.7629(2)   | 0.0609(8)   |
| C(9)   | 0.3709(4)  | 0.3666(4)  | 0.6304(3)   | 0.0379(10)  |
| F(00B) | 0.2429(3)  | 0.2365(3)  | 0.5534(2)   | 0.0606(8)   |
| C(10)  | 0.2678(4)  | 0.3467(4)  | 0.5900(3)   | 0.0395(10)  |
| C(11)  | 0.1925(4)  | 0.4424(4)  | 0.5858(3)   | 0.0378(10)  |
| C(12)  | 0.2158(4)  | 0.5577(4)  | 0.6212(3)   | 0.0348(9)   |
| C(13)  | 0.0606(4)  | 0.6791(5)  | 0.6870(3)   | 0.0448(11)  |
| C(14)  | 0.1309(4)  | 0.6598(4)  | 0.6153(3)   | 0.0357(9)   |
| C(15)  | 0.1138(4)  | 0.7309(4)  | 0.5381(3)   | 0.0374(10)  |
| C(16)  | 0.0263(4)  | 0.8158(4)  | 0.5333(3)   | 0.0429(11)  |
| C(17)  | -0.0416(4) | 0.8332(5)  | 0.6059(4)   | 0.0484(12)  |
| C(18)  | -0.0234(4) | 0.7673(5)  | 0.6842(3)   | 0.0484(12)  |

**Table S9.** Anisotropic displacement parameters [ $\text{\AA}^2$ ] for **anti-m-1**

|        | U11        | U22        | U33        | U23         | U13         | U12         |
|--------|------------|------------|------------|-------------|-------------|-------------|
| I(1)   | 0.0576(3)  | 0.0859(3)  | 0.0415(2)  | 0.00717(16) | 0.00796(16) | -0.0189(2)  |
| F(1)   | 0.059(2)   | 0.086(2)   | 0.0473(16) | 0.0122(15)  | -0.0197(15) | -0.0019(18) |
| C(1)   | 0.031(2)   | 0.036(2)   | 0.036(2)   | -0.0011(17) | 0.0000(17)  | -0.0020(18) |
| I(2)   | 0.0702(3)  | 0.0660(3)  | 0.0458(2)  | 0.00389(15) | 0.01923(18) | 0.01474(19) |
| F(2)   | 0.0293(15) | 0.088(2)   | 0.083(2)   | -0.0103(19) | -0.0154(15) | -0.0008(16) |
| C(2)   | 0.034(2)   | 0.038(2)   | 0.036(2)   | -0.0009(17) | 0.0027(17)  | -0.0036(19) |
| F(003) | 0.0370(15) | 0.0471(15) | 0.0640(18) | -0.0159(13) | -0.0108(13) | -0.0003(13) |
| F(3)   | 0.0442(18) | 0.102(3)   | 0.0608(19) | -0.0082(17) | 0.0179(15)  | -0.0313(18) |
| C(3)   | 0.041(3)   | 0.046(3)   | 0.041(2)   | 0.0011(19)  | -0.010(2)   | 0.003(2)    |
| F(004) | 0.0493(18) | 0.0451(16) | 0.0695(19) | -0.0084(13) | -0.0098(15) | 0.0063(13)  |
| F(4)   | 0.0548(19) | 0.087(2)   | 0.0358(14) | 0.0068(14)  | -0.0006(13) | -0.0217(16) |
| C(4)   | 0.027(2)   | 0.054(3)   | 0.054(3)   | -0.012(2)   | -0.004(2)   | 0.003(2)    |
| F(005) | 0.0356(15) | 0.0602(17) | 0.0634(18) | -0.0108(14) | -0.0156(13) | -0.0094(13) |
| F(5)   | 0.063(2)   | 0.0535(17) | 0.0584(18) | 0.0046(14)  | -0.0019(15) | 0.0128(15)  |
| C(5)   | 0.037(3)   | 0.059(3)   | 0.048(3)   | -0.011(2)   | 0.009(2)    | -0.009(2)   |
| F(6)   | 0.0460(19) | 0.0545(18) | 0.097(3)   | -0.0149(17) | 0.0099(17)  | 0.0156(15)  |
| C(6)   | 0.037(2)   | 0.048(3)   | 0.037(2)   | -0.0018(19) | 0.0022(19)  | -0.009(2)   |
| C(7)   | 0.031(2)   | 0.038(2)   | 0.036(2)   | -0.0023(17) | -0.0021(17) | -0.0076(19) |
| F(7)   | 0.067(2)   | 0.079(2)   | 0.071(2)   | -0.0181(17) | 0.0378(18)  | 0.0030(18)  |
| C(8)   | 0.029(2)   | 0.045(2)   | 0.0296(19) | -0.0008(17) | -0.0002(16) | -0.0103(19) |
| F(8)   | 0.063(2)   | 0.081(2)   | 0.0399(15) | 0.0067(14)  | 0.0129(14)  | 0.0004(17)  |
| C(9)   | 0.036(2)   | 0.042(2)   | 0.036(2)   | 0.0021(18)  | 0.0004(18)  | 0.000(2)    |
| F(00B) | 0.061(2)   | 0.0421(16) | 0.078(2)   | -0.0168(14) | -0.0141(17) | -0.0070(15) |
| C(10)  | 0.042(3)   | 0.035(2)   | 0.042(2)   | -0.0050(18) | 0.0014(19)  | -0.008(2)   |
| C(11)  | 0.030(2)   | 0.049(2)   | 0.035(2)   | -0.0006(18) | -0.0017(17) | -0.010(2)   |
| C(12)  | 0.027(2)   | 0.044(2)   | 0.033(2)   | 0.0009(17)  | 0.0012(17)  | -0.0017(18) |
| C(13)  | 0.039(3)   | 0.053(3)   | 0.042(2)   | -0.003(2)   | 0.002(2)    | -0.008(2)   |
| C(14)  | 0.027(2)   | 0.045(2)   | 0.035(2)   | -0.0064(18) | -0.0013(17) | -0.0020(19) |
| C(15)  | 0.031(2)   | 0.044(2)   | 0.037(2)   | -0.0083(18) | 0.0025(17)  | -0.0053(19) |
| C(16)  | 0.039(3)   | 0.040(2)   | 0.049(3)   | -0.009(2)   | -0.003(2)   | -0.003(2)   |
| C(17)  | 0.032(2)   | 0.048(3)   | 0.066(3)   | -0.017(2)   | 0.006(2)    | -0.001(2)   |
| C(18)  | 0.036(3)   | 0.061(3)   | 0.048(3)   | -0.017(2)   | 0.016(2)    | -0.006(2)   |

**Table S10.** Atomic coordinates and equivalent isotropic displacement parameters [Å<sup>2</sup>] for **syn-p1-TDACI**

|       | x           | y           | z           | U(eq)       |
|-------|-------------|-------------|-------------|-------------|
| I(1)  | -0.05136(5) | 0.62723(4)  | 0.13469(2)  | 0.03972(13) |
| I(2)  | 0.29522(5)  | 0.40474(4)  | 0.22152(2)  | 0.03835(13) |
| F(1)  | -0.2969(5)  | 0.7902(5)   | 0.0605(2)   | 0.0586(14)  |
| F(2)  | -0.2797(6)  | 0.9319(5)   | -0.0333(2)  | 0.0587(13)  |
| F(3)  | -0.0191(6)  | 0.9511(5)   | -0.0845(2)  | 0.0565(13)  |
| F(4)  | 0.2235(6)   | 0.8177(5)   | -0.0432(2)  | 0.0537(12)  |
| F(5)  | 0.3139(6)   | 0.8228(4)   | 0.0880(2)   | 0.0532(13)  |
| F(6)  | 0.5274(5)   | 0.6749(4)   | 0.14040(18) | 0.0446(10)  |
| F(7)  | 0.3508(6)   | 0.3223(4)   | 0.0737(2)   | 0.0642(16)  |
| F(8)  | 0.1380(6)   | 0.4702(4)   | 0.0219(2)   | 0.0546(13)  |
| F(9)  | 0.7293(6)   | 0.4226(5)   | 0.0765(2)   | 0.0536(12)  |
| F(10) | 0.9243(6)   | 0.2756(5)   | 0.1401(2)   | 0.0640(15)  |
| F(11) | 0.8463(6)   | 0.1890(5)   | 0.2397(2)   | 0.0603(14)  |
| F(12) | 0.5798(6)   | 0.2501(4)   | 0.2764(2)   | 0.0505(12)  |
| C(1)  | -0.0429(8)  | 0.7249(6)   | 0.0585(3)   | 0.0341(14)  |
| C(2)  | -0.1653(9)  | 0.7932(8)   | 0.0356(3)   | 0.0434(17)  |
| C(3)  | -0.1587(9)  | 0.8679(7)   | -0.0127(3)  | 0.0408(17)  |
| C(4)  | -0.0270(10) | 0.8767(7)   | -0.0386(3)  | 0.0412(17)  |
| C(5)  | 0.0963(9)   | 0.8065(7)   | -0.0166(3)  | 0.0384(16)  |
| C(6)  | 0.0899(8)   | 0.7300(6)   | 0.0305(3)   | 0.0326(14)  |
| C(7)  | 0.2215(8)   | 0.6524(6)   | 0.0525(3)   | 0.0334(14)  |
| C(8)  | 0.3250(8)   | 0.6997(6)   | 0.0822(3)   | 0.0371(16)  |
| C(9)  | 0.4352(8)   | 0.6244(7)   | 0.1094(3)   | 0.0356(15)  |
| C(10) | 0.4457(8)   | 0.4945(7)   | 0.1078(3)   | 0.0346(15)  |
| C(11) | 0.3453(9)   | 0.4463(7)   | 0.0767(3)   | 0.0378(16)  |
| C(12) | 0.2360(8)   | 0.5234(7)   | 0.0489(3)   | 0.0367(15)  |
| C(13) | 0.5490(8)   | 0.4107(6)   | 0.1425(3)   | 0.0372(16)  |
| C(14) | 0.6889(9)   | 0.3799(8)   | 0.1254(3)   | 0.0441(18)  |
| C(15) | 0.7899(9)   | 0.3064(7)   | 0.1577(4)   | 0.048(2)    |
| C(16) | 0.7505(10)  | 0.2617(7)   | 0.2082(4)   | 0.047(2)    |
| C(17) | 0.6115(9)   | 0.2924(6)   | 0.2264(3)   | 0.0404(17)  |
| C(18) | 0.5089(8)   | 0.3652(6)   | 0.1936(3)   | 0.0370(16)  |
| N(1)  | 0.2536(7)   | 0.0441(6)   | 0.2416(3)   | 0.0424(15)  |
| N(2)  | 0.5764(7)   | -0.0450(6)  | 0.3253(3)   | 0.0409(14)  |
| N(3)  | 0.6140(8)   | -0.0112(6)  | 0.1810(3)   | 0.0445(15)  |
| C(37) | 0.5331(8)   | -0.0072(7)  | 0.2241(3)   | 0.0376(16)  |
| C(38) | 0.3986(8)   | 0.0144(6)   | 0.2465(3)   | 0.0347(15)  |
| C(39) | 0.5205(8)   | -0.0201(7)  | 0.2777(3)   | 0.0370(15)  |
| C(40) | 0.7358(9)   | -0.0574(9)  | 0.3335(4)   | 0.056(2)    |
| C(41) | 0.4785(10)  | -0.0399(8)  | 0.3704(3)   | 0.0461(18)  |
| C(42) | 0.1676(10)  | 0.0761(8)   | 0.2864(4)   | 0.051(2)    |
| C(43) | 0.1841(9)   | 0.0598(8)   | 0.1901(4)   | 0.050(2)    |
| C(44) | 0.5486(11)  | 0.0260(9)   | 0.1291(3)   | 0.054(2)    |
| C(45) | 0.7613(10)  | -0.0680(9)  | 0.1839(4)   | 0.057(2)    |
| Cl(2) | -0.0350(2)  | 0.48628(18) | 0.24890(7)  | 0.0447(4)   |
| I(3)  | 0.63880(5)  | 0.60659(4)  | 0.27823(2)  | 0.03782(12) |
| I(4)  | 0.98260(5)  | 0.34096(5)  | 0.36239(2)  | 0.04013(13) |

|        |            |           |             |            |
|--------|------------|-----------|-------------|------------|
| F(13)  | 0.3485(5)  | 0.7548(4) | 0.22468(18) | 0.0448(10) |
| F(14)  | 0.0737(6)  | 0.7898(4) | 0.2591(2)   | 0.0548(13) |
| F(15)  | -0.0033(5) | 0.6890(5) | 0.3574(2)   | 0.0575(13) |
| F(16)  | 0.1999(5)  | 0.5528(5) | 0.42097(19) | 0.0498(11) |
| F(17)  | 0.6065(6)  | 0.6859(4) | 0.4152(2)   | 0.0566(13) |
| F(18)  | 0.8214(6)  | 0.5410(4) | 0.4676(2)   | 0.0517(12) |
| F(19)  | 0.3947(5)  | 0.3233(4) | 0.3707(2)   | 0.0554(13) |
| F(20)  | 0.6078(6)  | 0.1777(4) | 0.4248(2)   | 0.0611(15) |
| F(21)  | 0.7176(6)  | 0.2189(5) | 0.54983(19) | 0.0504(11) |
| F(22)  | 0.9519(7)  | 0.0757(5) | 0.5926(2)   | 0.0601(14) |
| F(23)  | 1.2024(6)  | 0.0530(5) | 0.5364(2)   | 0.0608(14) |
| F(24)  | 1.2153(6)  | 0.1634(5) | 0.4374(2)   | 0.0603(14) |
| C(19)  | 0.4256(8)  | 0.6408(6) | 0.3062(3)   | 0.0346(15) |
| C(20)  | 0.3175(9)  | 0.7076(7) | 0.2739(3)   | 0.0408(17) |
| C(21)  | 0.1744(9)  | 0.7234(7) | 0.2906(4)   | 0.0433(18) |
| C(22)  | 0.1365(9)  | 0.6723(7) | 0.3404(4)   | 0.0447(18) |
| C(23)  | 0.2409(9)  | 0.6036(7) | 0.3728(3)   | 0.0419(17) |
| C(24)  | 0.3848(8)  | 0.5878(6) | 0.3568(3)   | 0.0359(15) |
| C(25)  | 0.4939(9)  | 0.5083(7) | 0.3923(3)   | 0.0370(15) |
| C(26)  | 0.6032(9)  | 0.5593(7) | 0.4183(3)   | 0.0394(16) |
| C(27)  | 0.7130(9)  | 0.4849(7) | 0.4454(3)   | 0.0381(16) |
| C(28)  | 0.7180(8)  | 0.3549(7) | 0.4483(3)   | 0.0356(15) |
| C(29)  | 0.6067(9)  | 0.3033(7) | 0.4239(3)   | 0.0393(16) |
| C(30)  | 0.4972(9)  | 0.3770(7) | 0.3969(3)   | 0.0419(17) |
| C(31)  | 0.8475(8)  | 0.2735(7) | 0.4714(3)   | 0.0358(15) |
| C(32)  | 0.8419(9)  | 0.2111(7) | 0.5211(3)   | 0.0408(17) |
| C(33)  | 0.9614(10) | 0.1374(7) | 0.5442(3)   | 0.0440(18) |
| C(34)  | 1.0865(10) | 0.1248(8) | 0.5155(3)   | 0.0465(19) |
| C(35)  | 1.0931(9)  | 0.1841(7) | 0.4638(3)   | 0.0441(18) |
| C(36)  | 0.9763(8)  | 0.2587(7) | 0.4410(3)   | 0.0367(15) |
| H(40A) | 0.785449   | -0.063569 | 0.299927    | 0.083      |
| H(40B) | 0.761158   | -0.133716 | 0.357985    | 0.083      |
| H(40C) | 0.767592   | 0.016581  | 0.348208    | 0.083      |
| H(41A) | 0.441942   | 0.047579  | 0.371811    | 0.069      |
| H(41B) | 0.532923   | -0.071547 | 0.402744    | 0.069      |
| H(41C) | 0.395107   | -0.092236 | 0.36699     | 0.069      |
| H(42A) | 0.079849   | 0.026642  | 0.290018    | 0.077      |
| H(42B) | 0.137371   | 0.166263  | 0.281086    | 0.077      |
| H(42C) | 0.227521   | 0.056986  | 0.318355    | 0.077      |
| H(43A) | 0.239443   | 0.007687  | 0.167199    | 0.074      |
| H(43B) | 0.183427   | 0.148634  | 0.174866    | 0.074      |
| H(43C) | 0.082572   | 0.03361   | 0.193642    | 0.074      |
| H(44A) | 0.623777   | 0.061214  | 0.104802    | 0.081      |
| H(44B) | 0.467757   | 0.089763  | 0.131381    | 0.081      |
| H(44C) | 0.510478   | -0.048012 | 0.116155    | 0.081      |
| H(45A) | 0.826409   | -0.014148 | 0.16164     | 0.086      |
| H(45B) | 0.761846   | -0.151097 | 0.171732    | 0.086      |
| H(45C) | 0.796051   | -0.077736 | 0.220308    | 0.086      |

**Table S11.** Anisotropic displacement parameters [ $\text{\AA}^2$ ] for **syn-p1-TDACI**

|       | U11       | U22        | U33       | U23          | U13         | U12          |
|-------|-----------|------------|-----------|--------------|-------------|--------------|
| I(1)  | 0.0374(2) | 0.0470(2)  | 0.0313(2) | 0.00657(18)  | 0.00442(18) | 0.00042(18)  |
| I(2)  | 0.0378(2) | 0.0386(2)  | 0.0381(3) | -0.00036(18) | 0.00086(19) | -0.00753(17) |
| F(1)  | 0.037(3)  | 0.077(3)   | 0.054(3)  | 0.014(3)     | 0.007(2)    | 0.014(2)     |
| F(2)  | 0.058(3)  | 0.054(3)   | 0.058(3)  | 0.011(2)     | -0.015(3)   | 0.011(2)     |
| F(3)  | 0.066(3)  | 0.058(3)   | 0.040(3)  | 0.015(2)     | -0.003(2)   | 0.004(2)     |
| F(4)  | 0.049(3)  | 0.066(3)   | 0.042(3)  | 0.011(2)     | 0.011(2)    | -0.008(2)    |
| F(5)  | 0.060(3)  | 0.031(2)   | 0.068(3)  | -0.002(2)    | -0.020(3)   | -0.006(2)    |
| F(6)  | 0.045(2)  | 0.043(2)   | 0.045(3)  | -0.0010(19)  | -0.015(2)   | -0.0118(19)  |
| F(7)  | 0.070(4)  | 0.038(2)   | 0.087(4)  | -0.024(2)    | -0.034(3)   | 0.010(2)     |
| F(8)  | 0.055(3)  | 0.045(2)   | 0.066(3)  | -0.018(2)    | -0.030(3)   | 0.003(2)     |
| F(9)  | 0.044(3)  | 0.070(3)   | 0.045(3)  | -0.006(2)    | 0.006(2)    | 0.010(2)     |
| F(10) | 0.044(3)  | 0.077(4)   | 0.069(4)  | -0.015(3)    | -0.002(3)   | 0.019(3)     |
| F(11) | 0.055(3)  | 0.050(3)   | 0.072(4)  | 0.002(2)     | -0.023(3)   | 0.012(2)     |
| F(12) | 0.064(3)  | 0.041(2)   | 0.044(3)  | 0.0035(19)   | -0.010(2)   | -0.002(2)    |
| C(1)  | 0.044(4)  | 0.033(3)   | 0.024(3)  | 0.002(3)     | 0.001(3)    | 0.002(3)     |
| C(2)  | 0.043(4)  | 0.051(4)   | 0.035(4)  | -0.002(3)    | -0.004(3)   | 0.000(3)     |
| C(3)  | 0.045(4)  | 0.038(4)   | 0.037(4)  | 0.003(3)     | -0.007(3)   | 0.002(3)     |
| C(4)  | 0.060(5)  | 0.035(3)   | 0.027(4)  | 0.005(3)     | -0.008(3)   | -0.008(3)    |
| C(5)  | 0.046(4)  | 0.033(3)   | 0.036(4)  | 0.000(3)     | 0.004(3)    | -0.006(3)    |
| C(6)  | 0.036(4)  | 0.033(3)   | 0.029(4)  | -0.002(3)    | -0.002(3)   | -0.003(3)    |
| C(7)  | 0.036(4)  | 0.037(3)   | 0.025(3)  | 0.002(3)     | -0.004(3)   | -0.002(3)    |
| C(8)  | 0.037(4)  | 0.032(3)   | 0.042(4)  | 0.002(3)     | 0.002(3)    | -0.009(3)    |
| C(9)  | 0.028(3)  | 0.043(4)   | 0.036(4)  | 0.000(3)     | 0.001(3)    | -0.007(3)    |
| C(10) | 0.031(3)  | 0.038(3)   | 0.033(4)  | -0.001(3)    | -0.001(3)   | 0.001(3)     |
| C(11) | 0.042(4)  | 0.033(3)   | 0.040(4)  | -0.010(3)    | -0.010(3)   | 0.003(3)     |
| C(12) | 0.037(4)  | 0.036(3)   | 0.037(4)  | -0.009(3)    | -0.005(3)   | 0.005(3)     |
| C(13) | 0.036(4)  | 0.033(3)   | 0.042(4)  | -0.005(3)    | -0.007(3)   | 0.003(3)     |
| C(14) | 0.045(4)  | 0.051(4)   | 0.037(4)  | -0.012(3)    | -0.001(3)   | -0.001(3)    |
| C(15) | 0.038(4)  | 0.040(4)   | 0.066(6)  | -0.012(4)    | -0.006(4)   | 0.009(3)     |
| C(16) | 0.047(5)  | 0.036(4)   | 0.058(6)  | -0.009(3)    | -0.015(4)   | 0.010(3)     |
| C(17) | 0.054(5)  | 0.030(3)   | 0.038(4)  | -0.004(3)    | -0.010(3)   | -0.003(3)    |
| C(18) | 0.034(4)  | 0.028(3)   | 0.050(5)  | -0.010(3)    | -0.005(3)   | -0.003(3)    |
| N(1)  | 0.030(3)  | 0.048(3)   | 0.050(4)  | -0.011(3)    | -0.001(3)   | 0.000(3)     |
| N(2)  | 0.037(3)  | 0.050(4)   | 0.035(4)  | 0.002(3)     | -0.005(3)   | -0.010(3)    |
| N(3)  | 0.040(4)  | 0.051(4)   | 0.042(4)  | -0.003(3)    | 0.010(3)    | -0.007(3)    |
| C(37) | 0.033(4)  | 0.035(3)   | 0.045(4)  | -0.002(3)    | 0.000(3)    | -0.008(3)    |
| C(38) | 0.037(4)  | 0.028(3)   | 0.039(4)  | -0.004(3)    | 0.003(3)    | -0.007(3)    |
| C(39) | 0.032(4)  | 0.039(4)   | 0.039(4)  | -0.002(3)    | 0.005(3)    | -0.005(3)    |
| C(40) | 0.038(4)  | 0.075(6)   | 0.051(5)  | 0.005(4)     | -0.011(4)   | -0.007(4)    |
| C(41) | 0.052(5)  | 0.048(4)   | 0.039(4)  | -0.006(3)    | 0.000(4)    | -0.005(4)    |
| C(42) | 0.044(5)  | 0.055(5)   | 0.057(6)  | -0.010(4)    | 0.006(4)    | -0.005(4)    |
| C(43) | 0.037(4)  | 0.058(5)   | 0.051(5)  | 0.003(4)     | -0.008(4)   | -0.001(4)    |
| C(44) | 0.056(5)  | 0.068(5)   | 0.038(5)  | -0.008(4)    | 0.005(4)    | -0.018(4)    |
| C(45) | 0.044(5)  | 0.062(5)   | 0.068(6)  | -0.017(5)    | 0.022(4)    | -0.011(4)    |
| Cl(2) | 0.0389(9) | 0.0633(11) | 0.0289(9) | 0.0065(8)    | 0.0057(7)   | -0.0073(8)   |
| I(3)  | 0.0364(2) | 0.0414(2)  | 0.0355(3) | -0.00224(17) | 0.00434(18) | -0.00775(17) |
| I(4)  | 0.0404(3) | 0.0490(3)  | 0.0289(2) | 0.00291(18)  | 0.00506(19) | -0.00329(19) |



|       |          |          |          |            |           |             |
|-------|----------|----------|----------|------------|-----------|-------------|
| F(13) | 0.058(3) | 0.037(2) | 0.038(3) | 0.0017(18) | -0.001(2) | -0.0056(19) |
| F(14) | 0.046(3) | 0.045(2) | 0.070(4) | 0.002(2)   | -0.010(2) | 0.004(2)    |
| F(15) | 0.038(3) | 0.058(3) | 0.075(4) | -0.008(3)  | 0.011(2)  | 0.004(2)    |
| F(16) | 0.045(3) | 0.059(3) | 0.044(3) | -0.003(2)  | 0.012(2)  | -0.006(2)   |
| F(17) | 0.069(3) | 0.035(2) | 0.067(4) | -0.008(2)  | -0.020(3) | -0.005(2)   |
| F(18) | 0.061(3) | 0.045(2) | 0.050(3) | -0.007(2)  | -0.020(2) | -0.009(2)   |
| F(19) | 0.045(3) | 0.043(2) | 0.078(4) | -0.005(2)  | -0.020(3) | -0.008(2)   |
| F(20) | 0.061(3) | 0.033(2) | 0.088(4) | -0.001(2)  | -0.022(3) | -0.010(2)   |
| F(21) | 0.053(3) | 0.061(3) | 0.036(3) | 0.001(2)   | 0.014(2)  | -0.011(2)   |
| F(22) | 0.076(4) | 0.065(3) | 0.035(3) | 0.009(2)   | -0.007(3) | -0.011(3)   |
| F(23) | 0.060(3) | 0.067(3) | 0.051(3) | 0.008(2)   | -0.017(3) | 0.006(3)    |
| F(24) | 0.045(3) | 0.080(4) | 0.051(3) | 0.005(3)   | 0.007(2)  | 0.010(2)    |
| C(19) | 0.036(4) | 0.029(3) | 0.038(4) | -0.003(3)  | 0.003(3)  | -0.005(3)   |
| C(20) | 0.051(5) | 0.032(3) | 0.039(4) | -0.002(3)  | 0.002(3)  | -0.002(3)   |
| C(21) | 0.044(4) | 0.032(3) | 0.053(5) | -0.003(3)  | -0.008(4) | 0.001(3)    |
| C(22) | 0.037(4) | 0.045(4) | 0.054(5) | -0.011(4)  | 0.005(4)  | 0.000(3)    |
| C(23) | 0.046(4) | 0.042(4) | 0.039(4) | -0.008(3)  | 0.011(3)  | -0.010(3)   |
| C(24) | 0.036(4) | 0.034(3) | 0.038(4) | -0.005(3)  | -0.001(3) | -0.003(3)   |
| C(25) | 0.040(4) | 0.041(4) | 0.029(4) | 0.000(3)   | 0.003(3)  | -0.003(3)   |
| C(26) | 0.049(4) | 0.034(3) | 0.036(4) | -0.003(3)  | 0.002(3)  | -0.007(3)   |
| C(27) | 0.042(4) | 0.037(4) | 0.036(4) | -0.005(3)  | -0.003(3) | -0.006(3)   |
| C(28) | 0.032(4) | 0.039(3) | 0.034(4) | -0.002(3)  | -0.002(3) | 0.001(3)    |
| C(29) | 0.042(4) | 0.034(3) | 0.041(4) | 0.001(3)   | 0.000(3)  | -0.006(3)   |
| C(30) | 0.041(4) | 0.043(4) | 0.041(4) | 0.000(3)   | -0.001(3) | -0.007(3)   |
| C(31) | 0.036(4) | 0.040(3) | 0.030(4) | 0.003(3)   | -0.001(3) | -0.007(3)   |
| C(32) | 0.040(4) | 0.044(4) | 0.038(4) | -0.004(3)  | 0.007(3)  | -0.006(3)   |
| C(33) | 0.058(5) | 0.043(4) | 0.030(4) | 0.003(3)   | -0.004(4) | -0.009(3)   |
| C(34) | 0.051(5) | 0.046(4) | 0.039(5) | 0.005(3)   | -0.009(4) | 0.003(4)    |
| C(35) | 0.047(5) | 0.047(4) | 0.037(4) | -0.001(3)  | 0.005(3)  | -0.002(3)   |
| C(36) | 0.039(4) | 0.037(3) | 0.033(4) | 0.000(3)   | 0.000(3)  | -0.005(3)   |

**Table 12.** Atomic coordinates and equivalent isotropic displacement parameters [ $\text{\AA}^2$ ] for **syn-p1-TDAI**

|          | x          | y           | z           | U(eq)      | S.O.F.   |
|----------|------------|-------------|-------------|------------|----------|
| I(2)     | 0.85027(5) | 0.66558(2)  | 0.27581(2)  | 0.04721(9) | 1        |
| F(5)     | 1.2004(4)  | 0.58883(13) | 0.06038(17) | 0.0603(10) | 1        |
| F(6)     | 1.2113(4)  | 0.56958(11) | 0.18715(16) | 0.0518(8)  | 1        |
| F(7)     | 0.5697(4)  | 0.61135(10) | 0.06981(15) | 0.0432(7)  | 1        |
| F(8)     | 0.5820(4)  | 0.59347(9)  | 0.19676(14) | 0.0384(6)  | 1        |
| F(9)     | 0.9636(5)  | 0.50765(9)  | 0.25242(16) | 0.0520(8)  | 1        |
| F(10)    | 0.9825(6)  | 0.49531(11) | 0.38162(19) | 0.0622(9)  | 1        |
| F(11)    | 0.9282(6)  | 0.55595(14) | 0.46358(18) | 0.0704(11) | 1        |
| F(12)    | 0.8616(6)  | 0.62917(13) | 0.41776(18) | 0.0727(11) | 1        |
| I(1A^a)  | 0.8511(5)  | 0.69398(10) | 0.04637(18) | 0.0455(3)  | 0.320(6) |
| F(1A^a)  | 0.840(5)   | 0.7176(7)   | -0.0850(13) | 0.064(5)   | 0.320(6) |
| F(2A^a)  | 0.858(4)   | 0.6700(8)   | -0.1870(13) | 0.070(5)   | 0.320(6) |
| F(3A^a)  | 0.893(5)   | 0.5919(7)   | -0.1741(12) | 0.078(6)   | 0.320(6) |
| F(4A^a)  | 0.917(5)   | 0.5606(8)   | -0.0575(12) | 0.061(5)   | 0.320(6) |
| C(10A^a) | 0.858(5)   | 0.6610(12)  | -0.0091(12) | 0.0564(10) | 0.320(6) |
| C(11A^a) | 0.856(3)   | 0.6786(9)   | -0.0686(11) | 0.0564(10) | 0.320(6) |
| C(12A^a) | 0.875(3)   | 0.6583(9)   | -0.1222(12) | 0.0564(10) | 0.320(6) |
| C(13A^a) | 0.883(3)   | 0.6180(9)   | -0.1278(10) | 0.0564(10) | 0.320(6) |
| C(14A^a) | 0.894(4)   | 0.5986(10)  | -0.0659(13) | 0.0564(10) | 0.320(6) |
| C(15A^a) | 0.8808(8)  | 0.6165(2)   | -0.0051(3)  | 0.0564(10) | 0.320(6) |
| I(1B^b)  | 0.8453(2)  | 0.70003(6)  | 0.06402(13) | 0.0455(3)  | 0.680(6) |
| F(1B^b)  | 0.842(2)   | 0.7025(4)   | -0.1011(8)  | 0.098(4)   | 0.680(6) |
| F(2B^b)  | 0.874(2)   | 0.6499(6)   | -0.1960(6)  | 0.125(7)   | 0.680(6) |
| F(3B^b)  | 0.914(2)   | 0.5716(5)   | -0.1662(6)  | 0.111(5)   | 0.680(6) |
| F(4B^b)  | 0.916(2)   | 0.5484(4)   | -0.0415(5)  | 0.069(3)   | 0.680(6) |
| C(10B^b) | 0.862(2)   | 0.6556(6)   | -0.0200(5)  | 0.0564(10) | 0.680(6) |
| C(11B^b) | 0.8598(14) | 0.6666(4)   | -0.0847(5)  | 0.0564(10) | 0.680(6) |
| C(12B^b) | 0.8737(14) | 0.6404(5)   | -0.1342(5)  | 0.0564(10) | 0.680(6) |
| C(13B^b) | 0.8965(14) | 0.6011(4)   | -0.1188(5)  | 0.0564(10) | 0.680(6) |
| C(14B^b) | 0.8989(17) | 0.5884(5)   | -0.0537(6)  | 0.0564(10) | 0.680(6) |
| C(15B^b) | 0.8808(8)  | 0.6165(2)   | -0.0051(3)  | 0.0564(10) | 0.680(6) |
| C(16)    | 0.8856(7)  | 0.60116(16) | 0.0621(2)   | 0.0378(11) | 1        |
| C(17)    | 1.0456(7)  | 0.58913(17) | 0.0934(3)   | 0.0399(11) | 1        |
| C(18)    | 1.0514(7)  | 0.57959(16) | 0.1582(2)   | 0.0369(11) | 1        |
| C(19)    | 0.8987(6)  | 0.58155(14) | 0.1955(2)   | 0.0327(10) | 1        |
| C(20)    | 0.7361(6)  | 0.59142(14) | 0.1634(2)   | 0.0322(10) | 1        |
| C(21)    | 0.7302(6)  | 0.60098(14) | 0.0983(2)   | 0.0344(10) | 1        |
| C(22)    | 0.9057(6)  | 0.57537(14) | 0.2662(2)   | 0.0328(10) | 1        |
| C(23)    | 0.8810(7)  | 0.60697(15) | 0.3098(3)   | 0.0377(11) | 1        |
| C(24)    | 0.8867(8)  | 0.59989(19) | 0.3753(3)   | 0.0488(14) | 1        |
| C(25)    | 0.9201(8)  | 0.5623(2)   | 0.4000(3)   | 0.0477(13) | 1        |
| C(26)    | 0.9473(8)  | 0.53143(17) | 0.3579(3)   | 0.0458(13) | 1        |
| C(27)    | 0.9392(7)  | 0.53799(15) | 0.2919(3)   | 0.0384(11) | 1        |
| N(1)     | 0.1724(6)  | 0.21585(14) | 0.3274(2)   | 0.0440(10) | 1        |
| N(2)     | 0.1846(6)  | 0.31569(12) | 0.3978(2)   | 0.0380(9)  | 1        |

|        |            |             |             |            |   |
|--------|------------|-------------|-------------|------------|---|
| N(3)   | 0.1653(8)  | 0.23078(15) | 0.5057(2)   | 0.0528(12) | 1 |
| C(1)   | 0.1730(6)  | 0.23926(15) | 0.3794(3)   | 0.0345(10) | 1 |
| C(2)   | 0.1771(6)  | 0.27681(14) | 0.4047(2)   | 0.0321(10) | 1 |
| C(3)   | 0.1701(7)  | 0.24500(15) | 0.4454(3)   | 0.0366(10) | 1 |
| C(4)   | 0.1542(9)  | 0.17374(17) | 0.3348(3)   | 0.0562(15) | 1 |
| C(5)   | 0.1749(8)  | 0.23138(18) | 0.2626(3)   | 0.0476(13) | 1 |
| C(6)   | 0.1749(9)  | 0.33329(17) | 0.3333(3)   | 0.0482(13) | 1 |
| C(7)   | 0.1919(7)  | 0.34036(15) | 0.4553(3)   | 0.0384(11) | 1 |
| C(8)   | 0.1530(14) | 0.2575(2)   | 0.5603(3)   | 0.082(3)   | 1 |
| C(9)   | 0.1525(8)  | 0.18903(17) | 0.5185(3)   | 0.0515(14) | 1 |
| I(3)   | 0.67667(4) | 0.32323(2)  | 0.43797(2)  | 0.04083(9) | 1 |
| I(4)   | 0.62993(5) | 0.35249(2)  | 0.21501(2)  | 0.03951(8) | 1 |
| F(13)  | 0.6849(5)  | 0.31638(10) | 0.59191(19) | 0.0622(9)  | 1 |
| F(14)  | 0.6435(6)  | 0.36916(13) | 0.68707(17) | 0.0666(10) | 1 |
| F(15)  | 0.5917(6)  | 0.44649(12) | 0.65954(17) | 0.0678(10) | 1 |
| F(16)  | 0.5867(6)  | 0.47107(9)  | 0.53566(16) | 0.0571(9)  | 1 |
| F(17)  | 0.9349(4)  | 0.40731(9)  | 0.41566(14) | 0.0418(6)  | 1 |
| F(18)  | 0.9108(4)  | 0.42227(9)  | 0.28913(14) | 0.0407(6)  | 1 |
| F(19)  | 0.3139(4)  | 0.43826(9)  | 0.43463(14) | 0.0417(7)  | 1 |
| F(20)  | 0.2900(4)  | 0.45390(10) | 0.30747(15) | 0.0451(7)  | 1 |
| F(21)  | 0.5370(5)  | 0.51107(9)  | 0.23616(14) | 0.0484(8)  | 1 |
| F(22)  | 0.4989(6)  | 0.52204(10) | 0.10728(16) | 0.0603(10) | 1 |
| F(23)  | 0.5253(7)  | 0.45976(11) | 0.02531(16) | 0.0719(12) | 1 |
| F(24)  | 0.5875(6)  | 0.38729(10) | 0.07200(16) | 0.0648(10) | 1 |
| C(28)  | 0.6578(6)  | 0.36629(14) | 0.5118(2)   | 0.0339(10) | 1 |
| C(29)  | 0.6605(8)  | 0.35472(15) | 0.5753(3)   | 0.0433(12) | 1 |
| C(30)  | 0.6383(8)  | 0.38121(19) | 0.6258(3)   | 0.0478(13) | 1 |
| C(31)  | 0.6121(8)  | 0.42053(19) | 0.6115(3)   | 0.0468(13) | 1 |
| C(32)  | 0.6098(8)  | 0.43245(15) | 0.5480(2)   | 0.0392(11) | 1 |
| C(33)  | 0.6309(6)  | 0.40660(15) | 0.4965(2)   | 0.0329(10) | 1 |
| C(34)  | 0.6232(6)  | 0.42085(13) | 0.4287(2)   | 0.0301(9)  | 1 |
| C(35)  | 0.4621(7)  | 0.43457(13) | 0.3992(2)   | 0.0321(10) | 1 |
| C(36)  | 0.4511(7)  | 0.44268(14) | 0.3339(2)   | 0.0330(10) | 1 |
| C(37)  | 0.5987(7)  | 0.43786(14) | 0.2942(2)   | 0.0322(10) | 1 |
| C(38)  | 0.7622(6)  | 0.42633(14) | 0.3243(2)   | 0.0319(10) | 1 |
| C(39)  | 0.7737(6)  | 0.41854(14) | 0.3900(2)   | 0.0316(10) | 1 |
| C(40)  | 0.5801(7)  | 0.44300(14) | 0.2236(2)   | 0.0335(10) | 1 |
| C(41)  | 0.5485(7)  | 0.47962(15) | 0.1971(2)   | 0.0372(11) | 1 |
| C(42)  | 0.5292(8)  | 0.48613(15) | 0.1311(3)   | 0.0435(12) | 1 |
| C(43)  | 0.5433(9)  | 0.45433(16) | 0.0893(3)   | 0.0469(13) | 1 |
| C(44)  | 0.5779(8)  | 0.41729(16) | 0.1147(3)   | 0.0443(12) | 1 |
| C(45)  | 0.5940(7)  | 0.41044(15) | 0.1801(2)   | 0.0368(10) | 1 |
| H(4A)  | 0.172018   | 0.166668    | 0.380664    | 0.084      | 1 |
| H(4AB) | 0.246102   | 0.160356    | 0.309148    | 0.084      | 1 |
| H(4AC) | 0.032102   | 0.165542    | 0.31948     | 0.084      | 1 |
| H(5A)  | 0.215614   | 0.258931    | 0.26405     | 0.071      | 1 |
| H(5AB) | 0.051978   | 0.230002    | 0.242675    | 0.071      | 1 |

|        |          |          |          |       |   |
|--------|----------|----------|----------|-------|---|
| H(5AC) | 0.258893 | 0.215797 | 0.236808 | 0.071 | 1 |
| H(6A)  | 0.285174 | 0.326556 | 0.309993 | 0.072 | 1 |
| H(6AB) | 0.165433 | 0.362052 | 0.337173 | 0.072 | 1 |
| H(6AC) | 0.067511 | 0.323119 | 0.309171 | 0.072 | 1 |
| H(7A)  | 0.275892 | 0.328673 | 0.48789  | 0.058 | 1 |
| H(7AB) | 0.069865 | 0.342308 | 0.473066 | 0.058 | 1 |
| H(7AC) | 0.234953 | 0.366776 | 0.443851 | 0.058 | 1 |
| H(8A)  | 0.275013 | 0.267161 | 0.572674 | 0.123 | 1 |
| H(8AB) | 0.1012   | 0.243473 | 0.597032 | 0.123 | 1 |
| H(8AC) | 0.074351 | 0.279811 | 0.547992 | 0.123 | 1 |
| H(9A)  | 0.02698  | 0.18238  | 0.529256 | 0.077 | 1 |
| H(9AB) | 0.234984 | 0.182108 | 0.555158 | 0.077 | 1 |
| H(9AC) | 0.187005 | 0.174232 | 0.479933 | 0.077 | 1 |

**Table 13.** Anisotropic displacement parameters [Å<sup>2</sup>] for **syn-p-1-TDAI**

|          | U11         | U22         | U33        | U23          | U13         | U12          |
|----------|-------------|-------------|------------|--------------|-------------|--------------|
| I(2)     | 0.05336(19) | 0.03311(17) | 0.0552(2)  | -0.01186(14) | 0.00163(15) | -0.00008(14) |
| F(5)     | 0.0392(16)  | 0.101(3)    | 0.0409(18) | -0.0034(18)  | 0.0132(14)  | 0.0027(17)   |
| F(6)     | 0.0355(15)  | 0.076(2)    | 0.0439(17) | 0.0012(16)   | 0.0010(13)  | 0.0094(14)   |
| F(7)     | 0.0366(14)  | 0.0547(19)  | 0.0384(15) | 0.0030(13)   | 0.0007(12)  | 0.0026(13)   |
| F(8)     | 0.0368(14)  | 0.0412(16)  | 0.0378(15) | 0.0006(12)   | 0.0101(12)  | 0.0025(12)   |
| F(9)     | 0.075(2)    | 0.0351(16)  | 0.0448(18) | -0.0034(13)  | -0.0058(16) | 0.0091(15)   |
| F(10)    | 0.082(2)    | 0.051(2)    | 0.053(2)   | 0.0142(16)   | -0.0080(18) | -0.0078(18)  |
| F(11)    | 0.086(3)    | 0.095(3)    | 0.0298(17) | 0.0051(18)   | 0.0037(17)  | -0.010(2)    |
| F(12)    | 0.103(3)    | 0.076(3)    | 0.0394(19) | -0.0281(18)  | 0.0081(19)  | 0.006(2)     |
| I(1A^a)  | 0.0510(2)   | 0.0384(5)   | 0.0470(9)  | 0.0029(5)    | -0.0001(5)  | -0.0038(3)   |
| F(1A^a)  | 0.093(11)   | 0.056(11)   | 0.042(9)   | 0.015(7)     | -0.008(7)   | 0.010(10)    |
| F(2A^a)  | 0.065(11)   | 0.110(14)   | 0.034(8)   | 0.003(8)     | 0.006(7)    | 0.001(10)    |
| F(3A^a)  | 0.107(15)   | 0.101(15)   | 0.026(8)   | -0.014(9)    | 0.011(8)    | 0.023(12)    |
| F(4A^a)  | 0.090(10)   | 0.068(15)   | 0.027(10)  | 0.014(7)     | 0.014(8)    | 0.001(10)    |
| C(10A^a) | 0.0488(13)  | 0.096(4)    | 0.0250(19) | 0.0058(17)   | 0.0055(12)  | -0.0051(18)  |
| C(11A^a) | 0.0488(13)  | 0.096(4)    | 0.0250(19) | 0.0058(17)   | 0.0055(12)  | -0.0051(18)  |
| C(12A^a) | 0.0488(13)  | 0.096(4)    | 0.0250(19) | 0.0058(17)   | 0.0055(12)  | -0.0051(18)  |
| C(13A^a) | 0.0488(13)  | 0.096(4)    | 0.0250(19) | 0.0058(17)   | 0.0055(12)  | -0.0051(18)  |
| C(14A^a) | 0.0488(13)  | 0.096(4)    | 0.0250(19) | 0.0058(17)   | 0.0055(12)  | -0.0051(18)  |
| C(15A^a) | 0.0488(13)  | 0.096(4)    | 0.0250(19) | 0.0058(17)   | 0.0055(12)  | -0.0051(18)  |
| I(1B^b)  | 0.0510(2)   | 0.0384(5)   | 0.0470(9)  | 0.0029(5)    | -0.0001(5)  | -0.0038(3)   |
| F(1B^b)  | 0.088(6)    | 0.119(12)   | 0.088(11)  | 0.064(8)     | 0.000(7)    | -0.006(9)    |
| F(2B^b)  | 0.072(5)    | 0.27(2)     | 0.033(5)   | 0.045(9)     | 0.006(4)    | 0.025(11)    |
| F(3B^b)  | 0.089(6)    | 0.207(16)   | 0.037(5)   | -0.034(9)    | 0.007(4)    | 0.019(11)    |
| F(4B^b)  | 0.095(5)    | 0.076(8)    | 0.035(6)   | -0.015(4)    | 0.015(5)    | -0.001(6)    |
| C(10B^b) | 0.0488(13)  | 0.096(4)    | 0.0250(19) | 0.0058(17)   | 0.0055(12)  | -0.0051(18)  |
| C(11B^b) | 0.0488(13)  | 0.096(4)    | 0.0250(19) | 0.0058(17)   | 0.0055(12)  | -0.0051(18)  |
| C(12B^b) | 0.0488(13)  | 0.096(4)    | 0.0250(19) | 0.0058(17)   | 0.0055(12)  | -0.0051(18)  |
| C(13B^b) | 0.0488(13)  | 0.096(4)    | 0.0250(19) | 0.0058(17)   | 0.0055(12)  | -0.0051(18)  |
| C(14B^b) | 0.0488(13)  | 0.096(4)    | 0.0250(19) | 0.0058(17)   | 0.0055(12)  | -0.0051(18)  |
| C(15B^b) | 0.0488(13)  | 0.096(4)    | 0.0250(19) | 0.0058(17)   | 0.0055(12)  | -0.0051(18)  |
| C(16)    | 0.042(3)    | 0.045(3)    | 0.027(2)   | -0.007(2)    | 0.003(2)    | -0.005(2)    |
| C(17)    | 0.036(2)    | 0.050(3)    | 0.035(3)   | -0.008(2)    | 0.010(2)    | -0.004(2)    |
| C(18)    | 0.036(2)    | 0.043(3)    | 0.031(3)   | -0.005(2)    | 0.002(2)    | 0.001(2)     |
| C(19)    | 0.038(2)    | 0.030(2)    | 0.030(2)   | -0.0054(18)  | 0.0039(19)  | 0.0006(19)   |
| C(20)    | 0.036(2)    | 0.028(2)    | 0.033(2)   | -0.0051(18)  | 0.0095(19)  | -0.0007(18)  |
| C(21)    | 0.035(2)    | 0.035(3)    | 0.033(2)   | -0.0006(19)  | -0.0037(19) | -0.0013(19)  |
| C(22)    | 0.032(2)    | 0.033(2)    | 0.034(3)   | -0.0023(19)  | 0.0041(19)  | -0.0004(18)  |
| C(23)    | 0.043(3)    | 0.035(3)    | 0.035(3)   | -0.010(2)    | 0.006(2)    | -0.001(2)    |
| C(24)    | 0.050(3)    | 0.060(4)    | 0.036(3)   | -0.016(3)    | 0.004(2)    | -0.007(3)    |
| C(25)    | 0.050(3)    | 0.069(4)    | 0.025(3)   | 0.001(2)     | 0.002(2)    | -0.012(3)    |
| C(26)    | 0.050(3)    | 0.045(3)    | 0.042(3)   | 0.009(2)     | -0.002(2)   | -0.009(2)    |
| C(27)    | 0.045(3)    | 0.037(3)    | 0.033(3)   | -0.005(2)    | 0.003(2)    | -0.002(2)    |
| N(1)     | 0.055(3)    | 0.040(2)    | 0.037(2)   | -0.0101(19)  | 0.002(2)    | 0.000(2)     |
| N(2)     | 0.053(2)    | 0.033(2)    | 0.029(2)   | 0.0015(16)   | 0.0029(18)  | -0.0018(18)  |

|       |             |             |             |              |             |             |
|-------|-------------|-------------|-------------|--------------|-------------|-------------|
| N(3)  | 0.086(4)    | 0.042(3)    | 0.031(2)    | 0.0045(19)   | 0.006(2)    | -0.007(2)   |
| C(1)  | 0.035(2)    | 0.034(2)    | 0.034(3)    | -0.005(2)    | 0.0022(19)  | -0.0022(19) |
| C(2)  | 0.036(2)    | 0.033(2)    | 0.027(2)    | -0.0039(18)  | 0.0013(18)  | 0.0002(19)  |
| C(3)  | 0.042(3)    | 0.029(2)    | 0.039(3)    | 0.000(2)     | -0.001(2)   | -0.0014(19) |
| C(4)  | 0.076(4)    | 0.038(3)    | 0.055(4)    | -0.013(3)    | 0.004(3)    | -0.008(3)   |
| C(5)  | 0.051(3)    | 0.056(4)    | 0.036(3)    | -0.010(2)    | -0.001(2)   | 0.001(3)    |
| C(6)  | 0.069(4)    | 0.039(3)    | 0.037(3)    | 0.010(2)     | 0.006(3)    | 0.004(3)    |
| C(7)  | 0.045(3)    | 0.034(3)    | 0.036(3)    | -0.006(2)    | 0.000(2)    | 0.005(2)    |
| C(8)  | 0.155(8)    | 0.059(4)    | 0.032(3)    | 0.005(3)     | 0.018(4)    | -0.007(5)   |
| C(9)  | 0.058(3)    | 0.042(3)    | 0.054(3)    | 0.019(3)     | 0.002(3)    | -0.002(3)   |
| I(3)  | 0.03904(16) | 0.03042(16) | 0.05317(19) | -0.00658(13) | 0.00367(13) | 0.00039(12) |
| I(4)  | 0.05278(18) | 0.02852(15) | 0.03725(16) | -0.00189(12) | 0.00172(13) | 0.00163(13) |
| F(13) | 0.083(2)    | 0.044(2)    | 0.059(2)    | 0.0206(16)   | -0.0032(19) | 0.0049(17)  |
| F(14) | 0.091(3)    | 0.079(3)    | 0.0304(17)  | 0.0198(17)   | 0.0056(17)  | 0.007(2)    |
| F(15) | 0.097(3)    | 0.075(3)    | 0.0316(17)  | -0.0123(16)  | 0.0045(17)  | 0.019(2)    |
| F(16) | 0.098(3)    | 0.0330(17)  | 0.0400(17)  | -0.0048(13)  | 0.0005(17)  | 0.0150(16)  |
| F(17) | 0.0353(14)  | 0.0535(18)  | 0.0363(15)  | 0.0028(13)   | -0.0013(12) | 0.0051(12)  |
| F(18) | 0.0377(14)  | 0.0516(18)  | 0.0333(15)  | -0.0002(12)  | 0.0081(12)  | 0.0017(12)  |
| F(19) | 0.0424(15)  | 0.0461(17)  | 0.0373(15)  | 0.0029(12)   | 0.0113(12)  | 0.0069(13)  |
| F(20) | 0.0392(15)  | 0.0593(19)  | 0.0364(15)  | 0.0053(13)   | -0.0034(12) | 0.0108(13)  |
| F(21) | 0.083(2)    | 0.0320(15)  | 0.0299(14)  | -0.0070(12)  | 0.0005(14)  | 0.0064(15)  |
| F(22) | 0.113(3)    | 0.0339(17)  | 0.0343(16)  | 0.0028(13)   | 0.0002(18)  | 0.0089(18)  |
| F(23) | 0.141(4)    | 0.051(2)    | 0.0232(16)  | 0.0010(14)   | 0.0014(19)  | 0.011(2)    |
| F(24) | 0.123(3)    | 0.0389(18)  | 0.0320(16)  | -0.0112(13)  | -0.0016(19) | 0.0111(19)  |
| C(28) | 0.035(2)    | 0.032(2)    | 0.034(2)    | -0.0043(19)  | 0.0030(19)  | -0.0012(19) |
| C(29) | 0.050(3)    | 0.031(3)    | 0.048(3)    | 0.011(2)     | 0.002(2)    | -0.001(2)   |
| C(30) | 0.050(3)    | 0.063(4)    | 0.031(3)    | 0.012(2)     | 0.009(2)    | 0.007(3)    |
| C(31) | 0.053(3)    | 0.056(3)    | 0.032(3)    | -0.006(2)    | 0.004(2)    | 0.003(3)    |
| C(32) | 0.056(3)    | 0.036(3)    | 0.026(2)    | -0.0035(19)  | 0.004(2)    | 0.001(2)    |
| C(33) | 0.035(2)    | 0.035(2)    | 0.029(2)    | 0.0003(19)   | 0.0015(18)  | 0.0019(19)  |
| C(34) | 0.040(2)    | 0.024(2)    | 0.026(2)    | -0.0025(17)  | 0.0045(19)  | -0.0021(18) |
| C(35) | 0.040(2)    | 0.027(2)    | 0.029(2)    | -0.0041(18)  | 0.0062(19)  | -0.0002(19) |
| C(36) | 0.039(2)    | 0.030(2)    | 0.030(2)    | -0.0019(18)  | -0.0011(19) | 0.0023(19)  |
| C(37) | 0.045(3)    | 0.026(2)    | 0.026(2)    | -0.0022(17)  | 0.0018(19)  | 0.0010(19)  |
| C(38) | 0.035(2)    | 0.034(2)    | 0.026(2)    | -0.0040(18)  | 0.0062(19)  | 0.0013(19)  |
| C(39) | 0.034(2)    | 0.032(2)    | 0.029(2)    | -0.0027(18)  | 0.0004(18)  | 0.0001(19)  |
| C(40) | 0.043(3)    | 0.031(2)    | 0.027(2)    | -0.0019(18)  | -0.0002(19) | 0.001(2)    |
| C(41) | 0.054(3)    | 0.032(3)    | 0.026(2)    | -0.0080(19)  | 0.002(2)    | -0.001(2)   |
| C(42) | 0.070(3)    | 0.032(3)    | 0.029(3)    | 0.002(2)     | 0.003(2)    | 0.002(2)    |
| C(43) | 0.079(4)    | 0.038(3)    | 0.023(2)    | -0.004(2)    | 0.000(2)    | 0.005(3)    |
| C(44) | 0.069(4)    | 0.036(3)    | 0.027(3)    | -0.008(2)    | -0.001(2)   | 0.006(2)    |
| C(45) | 0.046(3)    | 0.034(3)    | 0.031(3)    | -0.0001(19)  | 0.002(2)    | 0.000(2)    |
| I(5)  | 0.04917(18) | 0.03127(17) | 0.0704(2)   | -0.00877(15) | 0.00191(16) | 0.00168(14) |

**Table S14.** Atomic coordinates and equivalent isotropic displacement parameters [ $\text{\AA}^2$ ] for **anti-p-1-TDACI**

|        | x           | y           | z            | U(eq)      | S.O.F.   |
|--------|-------------|-------------|--------------|------------|----------|
| I(1)   | 0.51402(3)  | 0.84424(2)  | 0.28855(2)   | 0.04085(8) | 1        |
| I(2)   | 0.83268(3)  | 0.30002(2)  | 0.14595(2)   | 0.03982(8) | 1        |
| F(1)   | 1.1196(3)   | 0.35373(19) | 0.03187(10)  | 0.0472(5)  | 1        |
| F(2)   | 1.3400(3)   | 0.5246(2)   | -0.01405(10) | 0.0523(6)  | 1        |
| F(3)   | 1.3226(3)   | 0.7053(2)   | 0.03306(11)  | 0.0561(6)  | 1        |
| F(4)   | 1.0701(3)   | 0.72006(19) | 0.12171(11)  | 0.0528(6)  | 1        |
| F(5)   | 0.6167(3)   | 0.5774(2)   | 0.10605(10)  | 0.0510(5)  | 1        |
| F(6)   | 0.3653(3)   | 0.6049(2)   | 0.19098(10)  | 0.0522(6)  | 1        |
| F(7)   | 0.7613(3)   | 0.5644(2)   | 0.33117(10)  | 0.0552(6)  | 1        |
| F(8)   | 1.0133(3)   | 0.5368(2)   | 0.24640(10)  | 0.0531(6)  | 1        |
| F(9)   | 0.3286(3)   | 0.41135(18) | 0.31776(11)  | 0.0517(5)  | 1        |
| F(10)  | 0.0765(3)   | 0.4159(2)   | 0.40820(12)  | 0.0613(7)  | 1        |
| F(11)  | 0.0265(3)   | 0.6017(2)   | 0.45063(12)  | 0.0621(7)  | 1        |
| F(12)  | 0.2212(3)   | 0.7847(2)   | 0.39952(12)  | 0.0592(7)  | 1        |
| C(1)   | 0.3831(5)   | 0.6929(3)   | 0.33173(16)  | 0.0380(7)  | 1        |
| C(2)   | 0.2527(5)   | 0.6932(3)   | 0.37861(17)  | 0.0443(8)  | 1        |
| C(3)   | 0.1499(5)   | 0.5998(3)   | 0.40519(17)  | 0.0446(8)  | 1        |
| C(4)   | 0.1763(5)   | 0.5057(3)   | 0.38406(18)  | 0.0447(9)  | 1        |
| C(5)   | 0.3073(5)   | 0.5051(3)   | 0.33749(16)  | 0.0395(8)  | 1        |
| C(6)   | 0.4131(4)   | 0.5957(3)   | 0.31176(15)  | 0.0358(7)  | 1        |
| C(7)   | 0.5548(4)   | 0.5859(3)   | 0.26357(16)  | 0.0362(7)  | 1        |
| C(8)   | 0.5250(4)   | 0.5877(3)   | 0.20534(17)  | 0.0387(8)  | 1        |
| C(9)   | 0.6554(5)   | 0.5736(3)   | 0.16131(16)  | 0.0395(8)  | 1        |
| C(10)  | 0.8233(4)   | 0.5555(3)   | 0.17364(16)  | 0.0357(7)  | 1        |
| C(11)  | 0.8528(4)   | 0.5543(3)   | 0.23170(17)  | 0.0391(8)  | 1        |
| C(12)  | 0.7231(5)   | 0.5685(3)   | 0.27639(16)  | 0.0397(8)  | 1        |
| C(13)  | 0.9630(4)   | 0.5419(3)   | 0.12557(15)  | 0.0360(7)  | 1        |
| C(14)  | 1.0797(5)   | 0.6274(3)   | 0.10088(16)  | 0.0397(8)  | 1        |
| C(15)  | 1.2097(5)   | 0.6216(3)   | 0.05500(17)  | 0.0431(8)  | 1        |
| C(16)  | 1.2188(4)   | 0.5294(3)   | 0.03179(16)  | 0.0408(8)  | 1        |
| C(17)  | 1.1043(5)   | 0.4425(3)   | 0.05603(16)  | 0.0376(7)  | 1        |
| C(18)  | 0.9780(4)   | 0.4455(3)   | 0.10363(15)  | 0.0355(7)  | 1        |
| N(1)   | 0.0178(4)   | 0.1274(3)   | 0.29485(14)  | 0.0446(7)  | 1        |
| N(2)   | 0.1590(5)   | -0.0486(3)  | 0.19037(16)  | 0.0503(8)  | 1        |
| N(3)   | 0.3034(4)   | 0.2433(3)   | 0.15341(14)  | 0.0423(7)  | 1        |
| C(29)  | 0.1077(5)   | 0.1154(3)   | 0.24376(16)  | 0.0391(8)  | 1        |
| C(30)  | 0.1615(5)   | 0.0488(3)   | 0.20505(17)  | 0.0408(8)  | 1        |
| C(31)  | 0.2174(4)   | 0.1575(3)   | 0.19136(16)  | 0.0389(8)  | 1        |
| C(32)  | -0.0086(6)  | 0.2353(4)   | 0.3073(2)    | 0.0561(10) | 1        |
| C(33)  | -0.0660(6)  | 0.0305(4)   | 0.33747(18)  | 0.0535(10) | 1        |
| C(34)  | 0.0486(6)   | -0.1393(4)  | 0.2284(2)    | 0.0589(11) | 1        |
| C(35)  | 0.2838(6)   | -0.0703(4)  | 0.1420(2)    | 0.0587(11) | 1        |
| C(36)  | 0.4072(5)   | 0.2240(4)   | 0.09928(18)  | 0.0478(9)  | 1        |
| C(37)  | 0.3447(5)   | 0.3380(3)   | 0.17639(19)  | 0.0486(9)  | 1        |
| Cl(1)  | 0.65210(14) | 0.07546(8)  | 0.21791(4)   | 0.0533(2)  | 1        |
| Cl(2A) | 0.2130(6)   | -0.0736(2)  | 0.96744(13)  | 0.1238(13) | 0.700(4) |
| Cl(3A) | 0.3050(4)   | 0.1568(2)   | 0.92796(16)  | 0.1032(8)  | 0.700(4) |
| C(28A) | 0.1874(15)  | 0.0502(6)   | 0.9126(5)    | 0.082(3)   | 0.700(4) |
| Cl(2B) | 0.053(2)    | -0.0949(8)  | 0.9575(5)    | 0.1238(13) | 0.198(3) |
| Cl(3B) | 0.3114(13)  | 0.0737(9)   | 0.9542(5)    | 0.1032(8)  | 0.198(3) |
| C(28B) | 0.189(5)    | 0.011(3)    | 0.9131(13)   | 0.082(3)   | 0.198(3) |
| Cl(2C) | 0.366(4)    | -0.0211(15) | 0.9756(8)    | 0.1238(13) | 0.101(3) |
| Cl(3C) | 0.274(3)    | 0.1607(15)  | 0.8896(10)   | 0.1032(8)  | 0.101(3) |
| C(28C) | 0.237(10)   | 0.017(2)    | 0.918(3)     | 0.082(3)   | 0.101(3) |
| I(3)   | 0.42807(3)  | 0.12129(2)  | 0.35804(2)   | 0.04968(9) | 1        |

|        |            |             |             |           |          |
|--------|------------|-------------|-------------|-----------|----------|
| F(13)  | 0.6392(3)  | 0.3106(2)   | 0.38212(11) | 0.0563(6) | 1        |
| F(14)  | 0.6282(3)  | 0.4097(2)   | 0.47355(12) | 0.0573(6) | 1        |
| F(15)  | 0.3797(3)  | 0.3537(2)   | 0.56997(11) | 0.0544(6) | 1        |
| F(16)  | 0.1493(3)  | 0.19405(19) | 0.57558(10) | 0.0479(5) | 1        |
| F(17)  | -0.0838(3) | 0.21832(16) | 0.47676(10) | 0.0435(5) | 1        |
| F(18)  | -0.3309(3) | 0.06491(18) | 0.49898(11) | 0.0484(5) | 1        |
| C(19)  | 0.3966(5)  | 0.1976(3)   | 0.43048(16) | 0.0391(8) | 1        |
| C(20)  | 0.5138(5)  | 0.2796(3)   | 0.42908(17) | 0.0411(8) | 1        |
| C(21)  | 0.5102(5)  | 0.3326(3)   | 0.47548(18) | 0.0431(8) | 1        |
| C(22)  | 0.3855(5)  | 0.3038(3)   | 0.52452(17) | 0.0420(8) | 1        |
| C(23)  | 0.2669(5)  | 0.2223(3)   | 0.52654(16) | 0.0380(7) | 1        |
| C(24)  | 0.2682(4)  | 0.1680(3)   | 0.48001(16) | 0.0357(7) | 1        |
| C(25)  | 0.1324(5)  | 0.0821(3)   | 0.48784(16) | 0.0355(7) | 1        |
| C(26)  | -0.0398(5) | 0.1105(3)   | 0.48888(16) | 0.0369(7) | 1        |
| C(27)  | -0.1673(4) | 0.0313(3)   | 0.50065(16) | 0.0375(7) | 1        |
| H(32A) | -0.074496  | 0.226907    | 0.347458    | 0.084     | 0.5      |
| H(32B) | -0.071892  | 0.282345    | 0.276552    | 0.084     | 0.5      |
| H(32C) | 0.102694   | 0.270127    | 0.306275    | 0.084     | 0.5      |
| H(32D) | 0.045367   | 0.292679    | 0.272732    | 0.084     | 0.5      |
| H(32E) | 0.042762   | 0.237241    | 0.343638    | 0.084     | 0.5      |
| H(32F) | -0.131823  | 0.249459    | 0.313915    | 0.084     | 0.5      |
| H(33A) | -0.130557  | 0.053491    | 0.37183     | 0.08      | 0.5      |
| H(33B) | 0.020696   | -0.024062   | 0.352127    | 0.08      | 0.5      |
| H(33C) | -0.144694  | -0.003317   | 0.317155    | 0.08      | 0.5      |
| H(33D) | -0.039146  | -0.036083   | 0.322245    | 0.08      | 0.5      |
| H(33E) | -0.1904    | 0.04147     | 0.341947    | 0.08      | 0.5      |
| H(33F) | -0.025009  | 0.020725    | 0.376919    | 0.08      | 0.5      |
| H(34A) | 0.005706   | -0.182516   | 0.202792    | 0.088     | 0.5      |
| H(34B) | -0.04844   | -0.108196   | 0.250076    | 0.088     | 0.5      |
| H(34C) | 0.114406   | -0.188019   | 0.257644    | 0.088     | 0.5      |
| H(34D) | 0.042076   | -0.136637   | 0.270882    | 0.088     | 0.5      |
| H(34E) | 0.096222   | -0.210958   | 0.223599    | 0.088     | 0.5      |
| H(34F) | -0.066625  | -0.131135   | 0.216031    | 0.088     | 0.5      |
| H(35A) | 0.28205    | -0.149971   | 0.143115    | 0.088     | 0.5      |
| H(35B) | 0.398538   | -0.048813   | 0.14759     | 0.088     | 0.5      |
| H(35C) | 0.254979   | -0.026909   | 0.102785    | 0.088     | 0.5      |
| H(35D) | 0.341662   | -0.000491   | 0.119212    | 0.088     | 0.5      |
| H(35E) | 0.225174   | -0.101649   | 0.114737    | 0.088     | 0.5      |
| H(35F) | 0.368732   | -0.123553   | 0.159542    | 0.088     | 0.5      |
| H(36A) | 0.489083   | 0.285726    | 0.082366    | 0.072     | 0.5      |
| H(36B) | 0.332271   | 0.219361    | 0.069081    | 0.072     | 0.5      |
| H(36C) | 0.469685   | 0.153952    | 0.110117    | 0.072     | 0.5      |
| H(36D) | 0.371609   | 0.153633    | 0.09201     | 0.072     | 0.5      |
| H(36E) | 0.528422   | 0.219998    | 0.105296    | 0.072     | 0.5      |
| H(36F) | 0.391007   | 0.285408    | 0.064259    | 0.072     | 0.5      |
| H(37A) | 0.384564   | 0.400714    | 0.142292    | 0.073     | 0.5      |
| H(37B) | 0.435126   | 0.31697     | 0.202524    | 0.073     | 0.5      |
| H(37C) | 0.242115   | 0.35981     | 0.199781    | 0.073     | 0.5      |
| H(37D) | 0.323306   | 0.317615    | 0.220773    | 0.073     | 0.5      |
| H(37E) | 0.272744   | 0.40136     | 0.160541    | 0.073     | 0.5      |
| H(37F) | 0.465755   | 0.358519    | 0.163284    | 0.073     | 0.5      |
| H(28A) | 0.064509   | 0.070094    | 0.913811    | 0.099     | 0.700(4) |
| H(28B) | 0.22941    | 0.04036     | 0.871668    | 0.099     | 0.700(4) |
| H(28C) | 0.119639   | 0.069344    | 0.889342    | 0.099     | 0.198(3) |
| H(28D) | 0.267741   | -0.019641   | 0.884077    | 0.099     | 0.198(3) |
| H(28E) | 0.114924   | 0.000436    | 0.933492    | 0.099     | 0.101(3) |
| H(28F) | 0.271478   | -0.023479   | 0.885664    | 0.099     | 0.101(3) |



**Table S15.** Anisotropic displacement parameters [Å<sup>2</sup>] for **anti-p-1-TDACI**

|       | U11         | U22         | U33         | U23          | U13         | U12         |
|-------|-------------|-------------|-------------|--------------|-------------|-------------|
| I(1)  | 0.03744(13) | 0.03616(13) | 0.04811(14) | -0.01337(10) | 0.00428(9)  | -0.00613(9) |
| I(2)  | 0.03303(13) | 0.03523(13) | 0.05143(14) | -0.01078(10) | -0.00576(9) | -0.00188(9) |
| F(1)  | 0.0447(12)  | 0.0512(13)  | 0.0520(12)  | -0.0256(10)  | -0.0053(9)  | 0.0068(10)  |
| F(2)  | 0.0377(11)  | 0.0723(16)  | 0.0449(11)  | -0.0167(11)  | 0.0053(9)   | 0.0014(11)  |
| F(3)  | 0.0432(12)  | 0.0554(14)  | 0.0634(14)  | -0.0080(11)  | 0.0059(10)  | -0.0166(11) |
| F(4)  | 0.0515(13)  | 0.0416(12)  | 0.0679(14)  | -0.0230(11)  | 0.0042(11)  | -0.0118(10) |
| F(5)  | 0.0396(12)  | 0.0756(16)  | 0.0431(11)  | -0.0239(11)  | -0.0075(9)  | 0.0065(11)  |
| F(6)  | 0.0318(11)  | 0.0772(16)  | 0.0517(12)  | -0.0231(11)  | -0.0081(9)  | 0.0080(11)  |
| F(7)  | 0.0427(12)  | 0.0849(18)  | 0.0427(11)  | -0.0247(11)  | -0.0067(9)  | 0.0072(12)  |
| F(8)  | 0.0294(11)  | 0.0838(17)  | 0.0506(12)  | -0.0245(12)  | -0.0068(9)  | 0.0038(11)  |
| F(9)  | 0.0545(14)  | 0.0364(11)  | 0.0632(13)  | -0.0171(10)  | 0.0061(11)  | -0.0053(10) |
| F(10) | 0.0587(15)  | 0.0404(12)  | 0.0733(16)  | -0.0062(11)  | 0.0203(12)  | -0.0124(11) |
| F(11) | 0.0591(15)  | 0.0514(14)  | 0.0634(14)  | -0.0094(11)  | 0.0285(12)  | -0.0022(12) |
| F(12) | 0.0653(16)  | 0.0426(13)  | 0.0654(14)  | -0.0223(11)  | 0.0258(12)  | -0.0056(11) |
| C(1)  | 0.0328(17)  | 0.0382(19)  | 0.0420(18)  | -0.0108(15)  | 0.0012(14)  | -0.0024(15) |
| C(2)  | 0.046(2)    | 0.039(2)    | 0.047(2)    | -0.0142(16)  | 0.0077(16)  | -0.0017(17) |
| C(3)  | 0.041(2)    | 0.040(2)    | 0.0465(19)  | -0.0068(16)  | 0.0096(16)  | 0.0008(16)  |
| C(4)  | 0.041(2)    | 0.0361(19)  | 0.049(2)    | -0.0020(16)  | 0.0062(16)  | -0.0096(16) |
| C(5)  | 0.0404(19)  | 0.0323(18)  | 0.0447(18)  | -0.0089(14)  | -0.0027(15) | 0.0014(15)  |
| C(6)  | 0.0298(17)  | 0.0379(18)  | 0.0389(17)  | -0.0090(14)  | -0.0018(13) | -0.0002(14) |
| C(7)  | 0.0317(17)  | 0.0343(17)  | 0.0423(17)  | -0.0117(14)  | 0.0007(14)  | 0.0005(14)  |
| C(8)  | 0.0279(17)  | 0.043(2)    | 0.0468(19)  | -0.0143(15)  | -0.0035(14) | -0.0018(15) |
| C(9)  | 0.0375(19)  | 0.045(2)    | 0.0383(17)  | -0.0165(15)  | -0.0016(14) | -0.0012(16) |
| C(10) | 0.0308(17)  | 0.0324(17)  | 0.0441(18)  | -0.0125(14)  | -0.0004(14) | 0.0006(14)  |
| C(11) | 0.0266(16)  | 0.047(2)    | 0.0460(19)  | -0.0157(16)  | -0.0041(14) | 0.0009(15)  |
| C(12) | 0.0379(19)  | 0.047(2)    | 0.0369(17)  | -0.0161(15)  | -0.0032(14) | -0.0007(16) |
| C(13) | 0.0297(17)  | 0.0403(19)  | 0.0377(17)  | -0.0106(14)  | -0.0007(13) | -0.0014(14) |
| C(14) | 0.0384(19)  | 0.0376(19)  | 0.0440(18)  | -0.0116(15)  | -0.0053(15) | -0.0015(15) |
| C(15) | 0.0329(18)  | 0.046(2)    | 0.0453(19)  | -0.0044(16)  | -0.0007(15) | -0.0075(16) |
| C(16) | 0.0296(17)  | 0.054(2)    | 0.0373(17)  | -0.0104(16)  | -0.0022(14) | 0.0034(16)  |
| C(17) | 0.0322(17)  | 0.0434(19)  | 0.0402(17)  | -0.0162(15)  | -0.0056(14) | 0.0072(15)  |
| C(18) | 0.0279(16)  | 0.0395(18)  | 0.0397(17)  | -0.0103(14)  | -0.0056(13) | 0.0006(14)  |
| N(1)  | 0.0382(16)  | 0.0511(19)  | 0.0428(16)  | -0.0107(14)  | 0.0009(13)  | -0.0057(14) |
| N(2)  | 0.0472(19)  | 0.0421(18)  | 0.063(2)    | -0.0191(15)  | 0.0016(15)  | -0.0078(15) |
| N(3)  | 0.0354(16)  | 0.0411(17)  | 0.0483(16)  | -0.0095(13)  | 0.0002(13)  | -0.0056(13) |
| C(29) | 0.0319(17)  | 0.0412(19)  | 0.0434(18)  | -0.0080(15)  | -0.0057(14) | -0.0036(15) |
| C(30) | 0.0335(18)  | 0.0405(19)  | 0.0464(19)  | -0.0076(15)  | -0.0030(15) | -0.0027(15) |
| C(31) | 0.0306(17)  | 0.0405(19)  | 0.0447(18)  | -0.0088(15)  | -0.0046(14) | 0.0008(15)  |
| C(32) | 0.055(3)    | 0.055(3)    | 0.056(2)    | -0.016(2)    | 0.0034(19)  | 0.005(2)    |
| C(33) | 0.048(2)    | 0.065(3)    | 0.043(2)    | -0.0081(18)  | 0.0032(17)  | -0.014(2)   |
| C(34) | 0.059(3)    | 0.048(2)    | 0.069(3)    | -0.017(2)    | 0.002(2)    | -0.016(2)   |
| C(35) | 0.056(3)    | 0.056(3)    | 0.068(3)    | -0.027(2)    | 0.002(2)    | -0.006(2)   |
| C(36) | 0.040(2)    | 0.053(2)    | 0.048(2)    | -0.0093(17)  | 0.0018(16)  | -0.0049(18) |
| C(37) | 0.042(2)    | 0.045(2)    | 0.057(2)    | -0.0106(18)  | -0.0049(17) | -0.0059(17) |
| Cl(1) | 0.0592(6)   | 0.0407(5)   | 0.0567(5)   | -0.0041(4)   | -0.0084(4)  | -0.0126(4)  |

|        |             |             |             |              |              |             |
|--------|-------------|-------------|-------------|--------------|--------------|-------------|
| CI(2A) | 0.201(4)    | 0.0653(13)  | 0.0933(15)  | -0.0154(11)  | 0.011(2)     | 0.0214(19)  |
| CI(3A) | 0.0995(16)  | 0.0910(16)  | 0.121(2)    | -0.0334(16)  | -0.0061(15)  | 0.0020(14)  |
| C(28A) | 0.101(6)    | 0.070(7)    | 0.077(4)    | -0.021(5)    | -0.010(4)    | 0.033(6)    |
| CI(2B) | 0.201(4)    | 0.0653(13)  | 0.0933(15)  | -0.0154(11)  | 0.011(2)     | 0.0214(19)  |
| CI(3B) | 0.0995(16)  | 0.0910(16)  | 0.121(2)    | -0.0334(16)  | -0.0061(15)  | 0.0020(14)  |
| C(28B) | 0.101(6)    | 0.070(7)    | 0.077(4)    | -0.021(5)    | -0.010(4)    | 0.033(6)    |
| CI(2C) | 0.201(4)    | 0.0653(13)  | 0.0933(15)  | -0.0154(11)  | 0.011(2)     | 0.0214(19)  |
| CI(3C) | 0.0995(16)  | 0.0910(16)  | 0.121(2)    | -0.0334(16)  | -0.0061(15)  | 0.0020(14)  |
| C(28C) | 0.101(6)    | 0.070(7)    | 0.077(4)    | -0.021(5)    | -0.010(4)    | 0.033(6)    |
| I(3)   | 0.04569(15) | 0.05637(16) | 0.05325(15) | -0.02590(12) | -0.00649(11) | 0.00731(12) |
| F(13)  | 0.0424(12)  | 0.0628(15)  | 0.0598(13)  | -0.0164(11)  | 0.0116(10)   | -0.0122(11) |
| F(14)  | 0.0477(13)  | 0.0474(13)  | 0.0777(16)  | -0.0188(12)  | -0.0023(11)  | -0.0169(11) |
| F(15)  | 0.0659(15)  | 0.0480(13)  | 0.0543(13)  | -0.0216(10)  | -0.0071(11)  | -0.0080(11) |
| F(16)  | 0.0512(13)  | 0.0443(12)  | 0.0449(11)  | -0.0115(9)   | 0.0078(9)    | -0.0073(10) |
| F(17)  | 0.0386(11)  | 0.0287(10)  | 0.0607(12)  | -0.0094(9)   | -0.0012(9)   | 0.0028(8)   |
| F(18)  | 0.0298(10)  | 0.0374(11)  | 0.0762(15)  | -0.0104(10)  | -0.0086(10)  | 0.0041(9)   |
| C(19)  | 0.0370(18)  | 0.0368(18)  | 0.0446(18)  | -0.0129(15)  | -0.0042(15)  | 0.0055(15)  |
| C(20)  | 0.0307(17)  | 0.0401(19)  | 0.0485(19)  | -0.0062(15)  | 0.0008(14)   | -0.0010(15) |
| C(21)  | 0.0399(19)  | 0.0311(17)  | 0.057(2)    | -0.0076(15)  | -0.0078(16)  | -0.0050(15) |
| C(22)  | 0.048(2)    | 0.0353(18)  | 0.0456(19)  | -0.0126(15)  | -0.0108(16)  | 0.0022(16)  |
| C(23)  | 0.0374(18)  | 0.0347(18)  | 0.0406(17)  | -0.0082(14)  | -0.0027(14)  | 0.0005(15)  |
| C(24)  | 0.0317(17)  | 0.0287(16)  | 0.0456(18)  | -0.0080(14)  | -0.0034(14)  | 0.0005(14)  |
| C(25)  | 0.0341(17)  | 0.0305(17)  | 0.0421(17)  | -0.0098(14)  | -0.0041(14)  | 0.0001(14)  |
| C(26)  | 0.0376(18)  | 0.0306(17)  | 0.0424(17)  | -0.0096(14)  | -0.0036(14)  | 0.0011(14)  |
| C(27)  | 0.0298(17)  | 0.0344(18)  | 0.0477(18)  | -0.0096(14)  | -0.0043(14)  | 0.0014(14)  |

**Table S16.** Atomic coordinates and equivalent isotropic displacement parameters [ $\text{\AA}^2$ ] for **anti-p-1-TDABr**

|        | x          | y           | z           | U(eq)       | S.O.F.   |
|--------|------------|-------------|-------------|-------------|----------|
| I(1)   | 0.43198(3) | 0.11959(2)  | 0.35969(2)  | 0.04006(9)  | 1        |
| F(1)   | -0.3334(3) | 0.06396(19) | 0.49815(12) | 0.0389(5)   | 1        |
| N(1)   | 0.1739(5)  | -0.0527(3)  | 0.19085(18) | 0.0428(8)   | 1        |
| C(1)   | -0.1696(5) | 0.0304(3)   | 0.50020(17) | 0.0289(7)   | 1        |
| I(2)   | 0.51986(3) | 0.83267(2)  | 0.29180(2)  | 0.03396(8)  | 1        |
| Br(2)  | 0.66220(6) | 0.06982(3)  | 0.21780(2)  | 0.04245(12) | 1        |
| F(2)   | -0.0882(3) | 0.21644(17) | 0.47653(11) | 0.0347(5)   | 1        |
| C(2)   | -0.0420(5) | 0.1097(3)   | 0.48873(16) | 0.0287(7)   | 1        |
| N(2)   | 0.0266(5)  | 0.1232(3)   | 0.29527(15) | 0.0364(7)   | 1        |
| N(3)   | 0.3059(4)  | 0.2388(3)   | 0.15350(15) | 0.0371(7)   | 1        |
| F(3)   | 0.1421(3)  | 0.1949(2)   | 0.57563(10) | 0.0399(5)   | 1        |
| I(3)   | 0.84456(3) | 0.30045(2)  | 0.14214(2)  | 0.03284(8)  | 1        |
| C(3)   | 0.1311(5)  | 0.0814(3)   | 0.48805(16) | 0.0276(7)   | 1        |
| C(27)  | 1.0823(5)  | 0.6263(3)   | 0.10121(18) | 0.0336(8)   | 1        |
| C(28)  | 0.2239(5)  | 0.1536(3)   | 0.19143(18) | 0.0325(8)   | 1        |
| C(29)  | 0.1714(5)  | 0.0448(3)   | 0.20501(17) | 0.0320(8)   | 1        |
| C(30)  | 0.1151(5)  | 0.1117(3)   | 0.24426(17) | 0.0319(8)   | 1        |
| C(31)  | 0.2992(7)  | -0.0738(4)  | 0.1421(2)   | 0.0531(12)  | 1        |
| C(32)  | 0.0644(7)  | -0.1426(4)  | 0.2282(2)   | 0.0497(11)  | 1        |
| C(33)  | -0.0522(6) | 0.0267(4)   | 0.33830(19) | 0.0438(10)  | 1        |
| C(34)  | -0.0096(7) | 0.2309(4)   | 0.3074(2)   | 0.0508(11)  | 1        |
| C(35)  | 0.3475(6)  | 0.3323(4)   | 0.1769(2)   | 0.0409(9)   | 1        |
| C(36)  | 0.4079(6)  | 0.2212(4)   | 0.09871(19) | 0.0421(10)  | 1        |
| C(37A) | 0.8175(10) | 0.9459(5)   | 0.0834(3)   | 0.0824(19)  | 0.888(3) |
| Cl(1A) | 0.7833(5)  | 1.06687(19) | 0.03084(11) | 0.1167(11)  | 0.888(3) |
| Cl(2A) | 0.7073(3)  | 0.8336(2)   | 0.06788(12) | 0.0973(7)   | 0.888(3) |
| C(37B) | 0.8175(10) | 0.9459(5)   | 0.0834(3)   | 0.0824(19)  | 0.112(3) |
| Cl(1B) | 0.922(3)   | 1.0799(12)  | 0.0510(9)   | 0.1167(11)  | 0.112(3) |
| Cl(2B) | 0.683(2)   | 0.9188(16)  | 0.0362(9)   | 0.0973(7)   | 0.112(3) |
| C(26)  | 1.2121(5)  | 0.6234(3)   | 0.05437(18) | 0.0352(8)   | 1        |
| C(25)  | 1.2250(5)  | 0.5326(4)   | 0.02990(16) | 0.0325(8)   | 1        |
| C(24)  | 1.1122(5)  | 0.4453(3)   | 0.05329(16) | 0.0305(8)   | 1        |
| C(23)  | 0.9863(5)  | 0.4465(3)   | 0.10148(16) | 0.0281(7)   | 1        |
| C(22)  | 0.9669(5)  | 0.5393(3)   | 0.12521(16) | 0.0289(7)   | 1        |
| C(21)  | 0.7270(5)  | 0.5598(3)   | 0.27627(17) | 0.0319(8)   | 1        |
| C(20)  | 0.8579(5)  | 0.5478(3)   | 0.23156(18) | 0.0323(8)   | 1        |
| C(9)   | 0.3955(5)  | 0.1967(3)   | 0.43183(16) | 0.0283(7)   | 1        |
| F(9)   | 0.0738(4)  | 0.4132(2)   | 0.40849(13) | 0.0541(7)   | 1        |
| C(8)   | 0.5111(5)  | 0.2795(3)   | 0.43033(18) | 0.0336(8)   | 1        |
| F(8)   | 0.0273(4)  | 0.5978(2)   | 0.45231(13) | 0.0555(7)   | 1        |
| C(7)   | 0.5037(5)  | 0.3323(3)   | 0.47649(19) | 0.0348(8)   | 1        |
| F(7)   | 0.2276(4)  | 0.7768(2)   | 0.40270(12) | 0.0524(7)   | 1        |
| C(6)   | 0.3771(5)  | 0.3046(3)   | 0.52515(18) | 0.0340(8)   | 1        |
| F(6)   | 0.6375(3)  | 0.3088(2)   | 0.38426(12) | 0.0457(6)   | 1        |
| C(5)   | 0.2611(5)  | 0.2225(3)   | 0.52684(16) | 0.0301(8)   | 1        |

|        |           |           |              |           |          |
|--------|-----------|-----------|--------------|-----------|----------|
| F(5)   | 0.6204(3) | 0.4095(2) | 0.47467(13)  | 0.0495(6) | 1        |
| C(4)   | 0.2650(5) | 0.1672(3) | 0.48112(16)  | 0.0275(7) | 1        |
| F(4)   | 0.3684(4) | 0.3551(2) | 0.57025(11)  | 0.0467(6) | 1        |
| C(11)  | 0.2565(6) | 0.6856(3) | 0.38086(18)  | 0.0367(9) | 1        |
| F(11)  | 0.3652(3) | 0.5984(2) | 0.19332(11)  | 0.0458(6) | 1        |
| C(10)  | 0.3860(5) | 0.6838(3) | 0.33422(17)  | 0.0303(8) | 1        |
| F(10)  | 0.3268(3) | 0.4060(2) | 0.31796(12)  | 0.0453(6) | 1        |
| C(12)  | 0.1516(6) | 0.5952(4) | 0.40677(18)  | 0.0382(9) | 1        |
| F(12)  | 0.6178(3) | 0.5740(2) | 0.10748(10)  | 0.0442(6) | 1        |
| C(14)  | 0.3062(5) | 0.4986(3) | 0.33864(18)  | 0.0328(8) | 1        |
| F(14)  | 1.0187(3) | 0.5304(3) | 0.24544(11)  | 0.0466(6) | 1        |
| C(13)  | 0.1749(6) | 0.5009(3) | 0.38505(19)  | 0.0374(9) | 1        |
| F(13)  | 0.7648(3) | 0.5550(3) | 0.33123(11)  | 0.0476(6) | 1        |
| F(15)  | 1.0706(3) | 0.7168(2) | 0.12351(12)  | 0.0469(6) | 1        |
| C(15)  | 0.4154(5) | 0.5883(3) | 0.31316(16)  | 0.0286(7) | 1        |
| F(16)  | 1.3227(4) | 0.7071(2) | 0.03321(13)  | 0.0515(7) | 1        |
| C(16)  | 0.5572(5) | 0.5780(3) | 0.26483(16)  | 0.0281(7) | 1        |
| C(19)  | 0.8262(5) | 0.5513(3) | 0.17348(16)  | 0.0282(7) | 1        |
| C(18)  | 0.6577(5) | 0.5686(3) | 0.16249(17)  | 0.0318(8) | 1        |
| F(18)  | 1.1305(3) | 0.3586(2) | 0.02756(11)  | 0.0411(5) | 1        |
| C(17)  | 0.5268(5) | 0.5816(3) | 0.20696(18)  | 0.0307(8) | 1        |
| F(17)  | 1.3457(3) | 0.5306(2) | -0.01681(11) | 0.0453(6) | 1        |
| H(31A) | 0.246319  | -0.05939  | 0.105051     | 0.08      | 1        |
| H(31B) | 0.336665  | -0.15108  | 0.152121     | 0.08      | 1        |
| H(31C) | 0.399045  | -0.025092 | 0.136417     | 0.08      | 1        |
| H(32A) | -0.047141 | -0.112641 | 0.242029     | 0.075     | 1        |
| H(32B) | 0.120436  | -0.179337 | 0.262991     | 0.075     | 1        |
| H(32C) | 0.046356  | -0.196106 | 0.204629     | 0.075     | 1        |
| H(33A) | -0.171886 | 0.019645  | 0.331709     | 0.066     | 1        |
| H(33B) | -0.050148 | 0.035332  | 0.379236     | 0.066     | 1        |
| H(33C) | 0.012402  | -0.039798 | 0.332872     | 0.066     | 1        |
| H(34A) | 0.051073  | 0.287598  | 0.274854     | 0.076     | 1        |
| H(34B) | 0.029702  | 0.233275  | 0.345504     | 0.076     | 1        |
| H(34C) | -0.134013 | 0.24488   | 0.310061     | 0.076     | 1        |
| H(35A) | 0.410175  | 0.38829   | 0.14452      | 0.061     | 1        |
| H(35B) | 0.419467  | 0.307027  | 0.208982     | 0.061     | 1        |
| H(35C) | 0.240654  | 0.364544  | 0.193078     | 0.061     | 1        |
| H(36A) | 0.34139   | 0.17689   | 0.079894     | 0.063     | 1        |
| H(36B) | 0.514548  | 0.182086  | 0.10861      | 0.063     | 1        |
| H(36C) | 0.436335  | 0.292774  | 0.070802     | 0.063     | 1        |
| H(37A) | 0.773701  | 0.954616  | 0.124282     | 0.099     | 0.888(3) |
| H(37B) | 0.942539  | 0.929843  | 0.081466     | 0.099     | 0.888(3) |
| H(37C) | 0.905899  | 0.887069  | 0.089504     | 0.099     | 0.112(3) |
| H(37D) | 0.750548  | 0.94649   | 0.12292      | 0.099     | 0.112(3) |

**Table S17.** Anisotropic displacement parameters [Å<sup>2</sup>] for **anti-p-1-TDABr**

|        | U11         | U22         | U33         | U23          | U13          | U12          |
|--------|-------------|-------------|-------------|--------------|--------------|--------------|
| I(1)   | 0.03698(16) | 0.04769(16) | 0.03985(15) | -0.02111(11) | -0.00252(11) | 0.00502(11)  |
| F(1)   | 0.0217(11)  | 0.0327(11)  | 0.0604(14)  | -0.0078(10)  | -0.0051(10)  | 0.0035(9)    |
| N(1)   | 0.038(2)    | 0.0387(19)  | 0.052(2)    | -0.0175(16)  | 0.0045(16)   | -0.0063(16)  |
| C(1)   | 0.0219(18)  | 0.0295(19)  | 0.0343(18)  | -0.0062(14)  | -0.0040(14)  | 0.0038(15)   |
| I(2)   | 0.03199(15) | 0.03107(14) | 0.03730(14) | -0.01074(10) | 0.00669(10)  | -0.00635(10) |
| Br(2)  | 0.0458(3)   | 0.0353(2)   | 0.0432(2)   | -0.00250(18) | -0.00515(19) | -0.01001(19) |
| F(2)   | 0.0314(12)  | 0.0224(10)  | 0.0481(12)  | -0.0067(9)   | -0.0010(10)  | 0.0029(9)    |
| C(2)   | 0.030(2)    | 0.0231(17)  | 0.0321(18)  | -0.0076(14)  | 0.0002(15)   | 0.0019(15)   |
| N(2)   | 0.0332(18)  | 0.0427(19)  | 0.0319(16)  | -0.0092(14)  | 0.0031(14)   | -0.0063(15)  |
| N(3)   | 0.0287(17)  | 0.0417(19)  | 0.0374(17)  | -0.0068(14)  | 0.0042(14)   | -0.0064(15)  |
| F(3)   | 0.0462(14)  | 0.0385(12)  | 0.0321(11)  | -0.0096(9)   | 0.0095(10)   | -0.0104(10)  |
| I(3)   | 0.02832(14) | 0.02966(13) | 0.04040(14) | -0.00840(10) | -0.00348(10) | -0.00172(9)  |
| C(3)   | 0.0271(19)  | 0.0256(17)  | 0.0291(17)  | -0.0064(14)  | -0.0005(14)  | -0.0004(14)  |
| C(27)  | 0.033(2)    | 0.033(2)    | 0.0358(19)  | -0.0119(16)  | -0.0020(16)  | -0.0035(16)  |
| C(28)  | 0.0227(19)  | 0.037(2)    | 0.0375(19)  | -0.0108(16)  | -0.0003(15)  | -0.0002(16)  |
| C(29)  | 0.0259(19)  | 0.035(2)    | 0.0338(18)  | -0.0077(15)  | -0.0010(15)  | -0.0021(16)  |
| C(30)  | 0.030(2)    | 0.0335(19)  | 0.0314(18)  | -0.0059(15)  | -0.0036(15)  | -0.0033(16)  |
| C(31)  | 0.050(3)    | 0.054(3)    | 0.059(3)    | -0.028(2)    | 0.006(2)     | -0.006(2)    |
| C(32)  | 0.049(3)    | 0.041(2)    | 0.058(3)    | -0.015(2)    | 0.002(2)     | -0.010(2)    |
| C(33)  | 0.041(2)    | 0.052(3)    | 0.033(2)    | -0.0025(18)  | 0.0026(18)   | -0.010(2)    |
| C(34)  | 0.054(3)    | 0.051(3)    | 0.045(2)    | -0.015(2)    | 0.005(2)     | 0.004(2)     |
| C(35)  | 0.033(2)    | 0.039(2)    | 0.049(2)    | -0.0084(18)  | 0.0001(18)   | -0.0060(18)  |
| C(36)  | 0.036(2)    | 0.052(3)    | 0.035(2)    | -0.0063(18)  | 0.0027(17)   | -0.0016(19)  |
| C(37A) | 0.096(5)    | 0.075(4)    | 0.073(4)    | -0.018(3)    | -0.004(4)    | 0.021(4)     |
| Cl(1A) | 0.177(3)    | 0.0723(12)  | 0.0803(13)  | -0.0054(10)  | 0.0208(15)   | 0.0423(16)   |
| Cl(2A) | 0.0978(15)  | 0.0833(14)  | 0.1139(17)  | -0.0326(12)  | -0.0097(13)  | 0.0017(12)   |
| C(37B) | 0.096(5)    | 0.075(4)    | 0.073(4)    | -0.018(3)    | -0.004(4)    | 0.021(4)     |
| Cl(1B) | 0.177(3)    | 0.0723(12)  | 0.0803(13)  | -0.0054(10)  | 0.0208(15)   | 0.0423(16)   |
| Cl(2B) | 0.0978(15)  | 0.0833(14)  | 0.1139(17)  | -0.0326(12)  | -0.0097(13)  | 0.0017(12)   |
| C(26)  | 0.029(2)    | 0.038(2)    | 0.0351(19)  | -0.0022(16)  | -0.0013(16)  | -0.0062(17)  |
| C(25)  | 0.0219(19)  | 0.050(2)    | 0.0240(17)  | -0.0075(16)  | 0.0013(14)   | 0.0014(17)   |
| C(24)  | 0.030(2)    | 0.036(2)    | 0.0284(17)  | -0.0122(15)  | -0.0066(15)  | 0.0074(16)   |
| C(23)  | 0.0257(19)  | 0.0295(18)  | 0.0290(17)  | -0.0073(14)  | -0.0029(14)  | -0.0014(15)  |
| C(22)  | 0.0237(18)  | 0.0329(19)  | 0.0298(17)  | -0.0081(15)  | -0.0011(14)  | -0.0003(15)  |
| C(21)  | 0.030(2)    | 0.039(2)    | 0.0271(17)  | -0.0110(15)  | -0.0001(15)  | -0.0011(16)  |
| C(20)  | 0.0232(19)  | 0.039(2)    | 0.0364(19)  | -0.0125(16)  | -0.0032(15)  | 0.0002(16)   |
| C(9)   | 0.0226(18)  | 0.0323(18)  | 0.0315(18)  | -0.0112(15)  | -0.0033(14)  | 0.0027(15)   |
| F(9)   | 0.0512(16)  | 0.0346(13)  | 0.0642(17)  | -0.0020(12)  | 0.0202(13)   | -0.0123(12)  |
| C(8)   | 0.028(2)    | 0.0317(19)  | 0.037(2)    | -0.0034(16)  | 0.0018(16)   | -0.0007(16)  |
| F(8)   | 0.0548(17)  | 0.0466(14)  | 0.0509(15)  | -0.0059(12)  | 0.0316(13)   | -0.0017(13)  |
| C(7)   | 0.031(2)    | 0.0276(18)  | 0.046(2)    | -0.0080(16)  | -0.0042(17)  | -0.0048(16)  |
| F(7)   | 0.0602(17)  | 0.0410(14)  | 0.0528(15)  | -0.0225(12)  | 0.0246(13)   | -0.0064(12)  |
| C(6)   | 0.038(2)    | 0.0326(19)  | 0.0329(19)  | -0.0115(15)  | -0.0045(16)  | -0.0014(17)  |
| F(6)   | 0.0330(13)  | 0.0510(15)  | 0.0484(13)  | -0.0127(11)  | 0.0148(11)   | -0.0131(11)  |
| C(5)   | 0.032(2)    | 0.0286(18)  | 0.0278(17)  | -0.0046(14)  | 0.0002(15)   | -0.0001(15)  |

|       |            |            |            |             |             |             |
|-------|------------|------------|------------|-------------|-------------|-------------|
| F(5)  | 0.0440(15) | 0.0403(14) | 0.0656(16) | -0.0167(12) | -0.0013(12) | -0.0177(11) |
| C(4)  | 0.0260(19) | 0.0225(17) | 0.0329(18) | -0.0049(14) | -0.0028(14) | 0.0004(14)  |
| F(4)  | 0.0630(17) | 0.0406(13) | 0.0411(13) | -0.0189(11) | -0.0052(12) | -0.0085(12) |
| C(11) | 0.039(2)   | 0.034(2)   | 0.0334(19) | -0.0078(16) | 0.0072(17)  | 0.0003(17)  |
| F(11) | 0.0249(12) | 0.0743(18) | 0.0401(12) | -0.0179(12) | -0.0048(10) | 0.0057(11)  |
| C(10) | 0.0256(19) | 0.0317(19) | 0.0315(18) | -0.0058(15) | 0.0018(15)  | -0.0034(15) |
| F(10) | 0.0514(15) | 0.0294(12) | 0.0532(14) | -0.0135(10) | 0.0074(12)  | -0.0075(11) |
| C(12) | 0.035(2)   | 0.039(2)   | 0.0342(19) | -0.0049(16) | 0.0133(17)  | 0.0013(17)  |
| F(12) | 0.0341(13) | 0.0706(17) | 0.0310(11) | -0.0189(11) | -0.0039(10) | 0.0016(12)  |
| C(14) | 0.034(2)   | 0.0269(19) | 0.0366(19) | -0.0087(15) | 0.0015(16)  | 0.0006(16)  |
| F(14) | 0.0241(12) | 0.0776(18) | 0.0415(13) | -0.0211(12) | -0.0050(10) | 0.0066(12)  |
| C(13) | 0.035(2)   | 0.031(2)   | 0.038(2)   | 0.0028(16)  | 0.0075(17)  | -0.0079(17) |
| F(13) | 0.0348(13) | 0.0802(19) | 0.0314(12) | -0.0206(12) | -0.0056(10) | 0.0052(13)  |
| F(15) | 0.0489(15) | 0.0366(13) | 0.0570(15) | -0.0210(11) | 0.0071(12)  | -0.0127(11) |
| C(15) | 0.0256(19) | 0.0325(19) | 0.0261(16) | -0.0063(14) | 0.0014(14)  | -0.0018(15) |
| F(16) | 0.0424(15) | 0.0509(15) | 0.0540(15) | -0.0047(12) | 0.0091(12)  | -0.0191(12) |
| C(16) | 0.0252(19) | 0.0288(18) | 0.0304(17) | -0.0106(14) | 0.0024(14)  | -0.0007(15) |
| C(19) | 0.0252(19) | 0.0283(18) | 0.0308(18) | -0.0092(14) | 0.0015(15)  | -0.0019(14) |
| C(18) | 0.031(2)   | 0.040(2)   | 0.0264(17) | -0.0123(15) | -0.0009(15) | -0.0015(16) |
| F(18) | 0.0432(14) | 0.0446(13) | 0.0400(12) | -0.0223(11) | -0.0017(10) | 0.0085(11)  |
| C(17) | 0.0199(18) | 0.036(2)   | 0.0358(19) | -0.0091(15) | -0.0017(15) | -0.0004(15) |
| F(17) | 0.0312(13) | 0.0668(17) | 0.0337(12) | -0.0111(11) | 0.0076(10)  | 0.0015(12)  |

**Table S18.** Atomic coordinates and equivalent isotropic displacement parameters [ $\text{\AA}^2$ ] for **anti-p-1-TDAI**

|        | x           | y          | z            | U(eq)       | S.O.F.   |
|--------|-------------|------------|--------------|-------------|----------|
| I(1)   | 0.52266(5)  | 0.82597(4) | 0.29325(2)   | 0.04305(12) | 1        |
| I(2)   | 0.85142(5)  | 0.30194(4) | 0.13967(2)   | 0.04273(12) | 1        |
| F(1)   | 0.2308(6)   | 0.7718(4)  | 0.4039(2)    | 0.0605(12)  | 1        |
| F(2)   | 0.0288(6)   | 0.5949(4)  | 0.4524(2)    | 0.0639(12)  | 1        |
| F(3)   | 0.0736(6)   | 0.4112(4)  | 0.4087(2)    | 0.0631(12)  | 1        |
| F(4)   | 0.3266(5)   | 0.4031(3)  | 0.31828(18)  | 0.0510(10)  | 1        |
| F(5)   | 0.7659(5)   | 0.5501(4)  | 0.33127(16)  | 0.0541(11)  | 1        |
| F(6)   | 1.0191(4)   | 0.5288(4)  | 0.24458(17)  | 0.0511(10)  | 1        |
| F(7)   | 0.6188(5)   | 0.5713(4)  | 0.10831(16)  | 0.0516(10)  | 1        |
| F(8)   | 0.3662(5)   | 0.5933(4)  | 0.19473(18)  | 0.0535(11)  | 1        |
| F(9)   | 1.0673(5)   | 0.7160(3)  | 0.12482(19)  | 0.0540(10)  | 1        |
| F(10)  | 1.3201(5)   | 0.7110(4)  | 0.0336(2)    | 0.0619(12)  | 1        |
| F(11)  | 1.3493(5)   | 0.5366(4)  | -0.01781(17) | 0.0605(12)  | 1        |
| F(12)  | 1.1375(5)   | 0.3628(4)  | 0.02578(19)  | 0.0563(11)  | 1        |
| C(1)   | 0.3883(8)   | 0.6784(5)  | 0.3354(3)    | 0.0368(14)  | 1        |
| C(2)   | 0.2567(9)   | 0.6808(6)  | 0.3821(3)    | 0.0435(15)  | 1        |
| C(3)   | 0.1519(9)   | 0.5922(6)  | 0.4074(3)    | 0.0438(16)  | 1        |
| C(4)   | 0.1770(9)   | 0.4987(6)  | 0.3852(3)    | 0.0439(15)  | 1        |
| C(5)   | 0.3079(8)   | 0.4953(5)  | 0.3395(3)    | 0.0381(14)  | 1        |
| C(6)   | 0.4163(8)   | 0.5821(6)  | 0.3142(3)    | 0.0360(14)  | 1        |
| C(7)   | 0.5584(8)   | 0.5725(5)  | 0.2656(3)    | 0.0345(13)  | 1        |
| C(8)   | 0.7267(8)   | 0.5558(6)  | 0.2764(3)    | 0.0376(14)  | 1        |
| C(9)   | 0.8586(8)   | 0.5449(6)  | 0.2314(3)    | 0.0365(14)  | 1        |
| C(10)  | 0.8280(7)   | 0.5497(5)  | 0.1736(3)    | 0.0323(13)  | 1        |
| C(11)  | 0.6582(8)   | 0.5653(5)  | 0.1633(3)    | 0.0353(13)  | 1        |
| C(12)  | 0.5285(7)   | 0.5773(5)  | 0.2080(3)    | 0.0362(14)  | 1        |
| C(13)  | 0.9691(7)   | 0.5407(6)  | 0.1244(3)    | 0.0348(13)  | 1        |
| C(14)  | 1.0813(8)   | 0.6269(6)  | 0.1015(3)    | 0.0395(14)  | 1        |
| C(15)  | 1.2119(8)   | 0.6255(6)  | 0.0543(3)    | 0.0452(16)  | 1        |
| C(16)  | 1.2266(8)   | 0.5370(7)  | 0.0290(3)    | 0.0431(16)  | 1        |
| C(17)  | 1.1174(8)   | 0.4494(6)  | 0.0513(3)    | 0.0416(16)  | 1        |
| C(18)  | 0.9900(8)   | 0.4483(5)  | 0.0998(3)    | 0.0353(13)  | 1        |
| C(37A) | 0.8154(17)  | 0.9411(10) | 0.0797(6)    | 0.099(4)    | 0.874(6) |
| Cl(1A) | 0.7090(5)   | 0.8282(3)  | 0.06593(19)  | 0.1260(12)  | 0.874(6) |
| Cl(2A) | 0.7758(7)   | 1.0609(3)  | 0.03014(17)  | 0.1210(17)  | 0.874(6) |
| C(37B) | 0.8154(17)  | 0.9411(10) | 0.0797(6)    | 0.099(4)    | 0.126(6) |
| Cl(1B) | 0.7090(5)   | 0.8282(3)  | 0.06593(19)  | 0.1260(12)  | 0.126(6) |
| Cl(2B) | 0.942(5)    | 1.081(2)   | 0.0500(12)   | 0.1210(17)  | 0.126(6) |
| N(1)   | 0.0312(7)   | 0.1217(5)  | 0.2959(2)    | 0.0408(12)  | 1        |
| N(2)   | 0.3080(6)   | 0.2354(5)  | 0.1538(2)    | 0.0392(12)  | 1        |
| N(3)   | 0.1805(8)   | -0.0560(5) | 0.1920(3)    | 0.0485(14)  | 1        |
| C(28)  | 0.1767(8)   | 0.0417(6)  | 0.2055(3)    | 0.0394(14)  | 1        |
| C(29)  | 0.1202(8)   | 0.1085(5)  | 0.2446(3)    | 0.0360(13)  | 1        |
| C(30)  | 0.2258(7)   | 0.1506(6)  | 0.1916(3)    | 0.0363(14)  | 1        |
| C(31)  | -0.0442(10) | 0.0259(7)  | 0.3390(3)    | 0.0532(18)  | 1        |

|        |             |            |             |             |          |
|--------|-------------|------------|-------------|-------------|----------|
| C(32)  | -0.0063(10) | 0.2287(6)  | 0.3069(3)   | 0.0489(17)  | 1        |
| C(33)  | 0.3470(9)   | 0.3300(6)  | 0.1760(3)   | 0.0448(16)  | 1        |
| C(34)  | 0.4062(9)   | 0.2178(7)  | 0.0980(3)   | 0.0491(17)  | 1        |
| C(35)  | 0.3012(10)  | -0.0759(7) | 0.1421(4)   | 0.059(2)    | 1        |
| C(36)  | 0.0726(10)  | -0.1451(6) | 0.2292(4)   | 0.0549(19)  | 1        |
| I(3)   | 0.67222(7)  | 0.06571(5) | 0.21635(2)  | 0.0385(2)   | 0.603(3) |
| CI(3)  | 0.67222(7)  | 0.06571(5) | 0.21635(2)  | 0.0385(2)   | 0.397(3) |
| I(4)   | 0.43388(5)  | 0.11762(4) | 0.36124(2)  | 0.04277(12) | 1        |
| F(13)  | 0.6384(5)   | 0.3063(3)  | 0.38588(18) | 0.0496(10)  | 1        |
| F(14)  | 0.6166(5)   | 0.4089(3)  | 0.4756(2)   | 0.0526(10)  | 1        |
| F(15)  | 0.3630(5)   | 0.3560(3)  | 0.57037(17) | 0.0486(9)   | 1        |
| F(16)  | 0.1379(5)   | 0.1963(3)  | 0.57581(15) | 0.0414(8)   | 1        |
| F(17)  | -0.0890(4)  | 0.2159(3)  | 0.47684(16) | 0.0377(8)   | 1        |
| F(18)  | -0.3330(4)  | 0.0626(3)  | 0.49779(18) | 0.0421(8)   | 1        |
| C(19)  | 0.3937(7)   | 0.1953(5)  | 0.4330(3)   | 0.0310(12)  | 1        |
| C(20)  | 0.5097(8)   | 0.2777(5)  | 0.4316(3)   | 0.0360(13)  | 1        |
| C(21)  | 0.5012(8)   | 0.3315(5)  | 0.4777(3)   | 0.0371(14)  | 1        |
| C(22)  | 0.3734(8)   | 0.3045(5)  | 0.5259(3)   | 0.0368(14)  | 1        |
| C(23)  | 0.2592(8)   | 0.2225(5)  | 0.5272(3)   | 0.0327(13)  | 1        |
| C(24)  | 0.2641(7)   | 0.1670(5)  | 0.4822(3)   | 0.0299(12)  | 1        |
| C(25)  | 0.1308(7)   | 0.0814(5)  | 0.4887(3)   | 0.0299(12)  | 1        |
| C(26)  | -0.0422(7)  | 0.1084(5)  | 0.4892(3)   | 0.0304(12)  | 1        |
| C(27)  | -0.1682(7)  | 0.0302(5)  | 0.4996(3)   | 0.0309(12)  | 1        |
| H(37A) | 0.775016    | 0.948665   | 0.121052    | 0.119       | 0.874(6) |
| H(37B) | 0.941001    | 0.926952   | 0.076101    | 0.119       | 0.874(6) |
| H(37C) | 0.897417    | 0.89999    | 0.105358    | 0.119       | 0.126(6) |
| H(37D) | 0.723512    | 0.96416    | 0.108417    | 0.119       | 0.126(6) |
| H(31A) | -0.148299   | 0.003977   | 0.325904    | 0.08        | 1        |
| H(31B) | -0.07424    | 0.04379    | 0.378178    | 0.08        | 1        |
| H(31C) | 0.039052    | -0.034689  | 0.341951    | 0.08        | 1        |
| H(32A) | 0.068575    | 0.283059   | 0.277971    | 0.073       | 1        |
| H(32B) | 0.013813    | 0.229267   | 0.34754     | 0.073       | 1        |
| H(32C) | -0.127081   | 0.247042   | 0.302811    | 0.073       | 1        |
| H(33A) | 0.406723    | 0.385604   | 0.143045    | 0.067       | 1        |
| H(33B) | 0.421011    | 0.307248   | 0.207235    | 0.067       | 1        |
| H(33C) | 0.239675    | 0.361038   | 0.192643    | 0.067       | 1        |
| H(34A) | 0.335906    | 0.176173   | 0.079166    | 0.074       | 1        |
| H(34B) | 0.511405    | 0.176497   | 0.106654    | 0.074       | 1        |
| H(34C) | 0.436823    | 0.289008   | 0.070785    | 0.074       | 1        |
| H(35A) | 0.245451    | -0.060133  | 0.105882    | 0.088       | 1        |
| H(35B) | 0.3382      | -0.152889  | 0.150622    | 0.088       | 1        |
| H(35C) | 0.401764    | -0.028032  | 0.135863    | 0.088       | 1        |
| H(36A) | -0.045362   | -0.118291  | 0.237177    | 0.082       | 1        |
| H(36B) | 0.11785     | -0.17204   | 0.267153    | 0.082       | 1        |
| H(36C) | 0.072623    | -0.205063  | 0.208474    | 0.082       | 1        |



**Table S19.** Anisotropic displacement parameters [ $\text{\AA}^2$ ] for **anti-p-1-TDAI**

|        | U11        | U22       | U33        | U23          | U13          | U12          |
|--------|------------|-----------|------------|--------------|--------------|--------------|
| I(1)   | 0.0360(2)  | 0.0516(3) | 0.0440(2)  | -0.02269(19) | 0.00675(17)  | -0.00776(18) |
| I(2)   | 0.0372(2)  | 0.0446(2) | 0.0533(3)  | -0.02196(19) | -0.01308(18) | 0.00537(17)  |
| F(1)   | 0.065(3)   | 0.059(3)  | 0.058(3)   | -0.034(2)    | 0.026(2)     | -0.008(2)    |
| F(2)   | 0.061(3)   | 0.057(3)  | 0.058(3)   | -0.008(2)    | 0.033(2)     | 0.005(2)     |
| F(3)   | 0.066(3)   | 0.048(2)  | 0.062(3)   | -0.002(2)    | 0.023(2)     | -0.011(2)    |
| F(4)   | 0.059(2)   | 0.042(2)  | 0.052(2)   | -0.0183(18)  | 0.0056(19)   | -0.0027(18)  |
| F(5)   | 0.041(2)   | 0.095(3)  | 0.0332(19) | -0.028(2)    | -0.0063(16)  | 0.010(2)     |
| F(6)   | 0.0240(17) | 0.092(3)  | 0.044(2)   | -0.028(2)    | -0.0055(15)  | 0.0053(18)   |
| F(7)   | 0.040(2)   | 0.088(3)  | 0.0332(19) | -0.027(2)    | -0.0077(16)  | 0.006(2)     |
| F(8)   | 0.0282(18) | 0.093(3)  | 0.046(2)   | -0.030(2)    | -0.0068(16)  | 0.0087(19)   |
| F(9)   | 0.056(2)   | 0.049(2)  | 0.061(3)   | -0.027(2)    | 0.004(2)     | -0.0134(19)  |
| F(10)  | 0.049(2)   | 0.074(3)  | 0.055(3)   | -0.007(2)    | 0.007(2)     | -0.019(2)    |
| F(11)  | 0.039(2)   | 0.104(4)  | 0.036(2)   | -0.020(2)    | 0.0049(17)   | 0.016(2)     |
| F(12)  | 0.055(2)   | 0.072(3)  | 0.053(2)   | -0.042(2)    | -0.0083(19)  | 0.022(2)     |
| C(1)   | 0.030(3)   | 0.046(4)  | 0.034(3)   | -0.014(3)    | 0.005(2)     | -0.003(3)    |
| C(2)   | 0.039(3)   | 0.052(4)  | 0.040(3)   | -0.018(3)    | 0.006(3)     | 0.002(3)     |
| C(3)   | 0.047(4)   | 0.046(4)  | 0.033(3)   | -0.007(3)    | 0.011(3)     | 0.000(3)     |
| C(4)   | 0.039(3)   | 0.047(4)  | 0.039(3)   | -0.003(3)    | 0.003(3)     | 0.000(3)     |
| C(5)   | 0.041(3)   | 0.036(3)  | 0.037(3)   | -0.009(3)    | -0.004(3)    | 0.005(3)     |
| C(6)   | 0.029(3)   | 0.050(4)  | 0.031(3)   | -0.015(3)    | -0.001(2)    | 0.003(3)     |
| C(7)   | 0.032(3)   | 0.040(3)  | 0.032(3)   | -0.014(3)    | 0.001(2)     | -0.001(3)    |
| C(8)   | 0.037(3)   | 0.051(4)  | 0.028(3)   | -0.018(3)    | -0.003(2)    | 0.004(3)     |
| C(9)   | 0.029(3)   | 0.047(4)  | 0.036(3)   | -0.015(3)    | -0.006(2)    | 0.001(3)     |
| C(10)  | 0.029(3)   | 0.037(3)  | 0.033(3)   | -0.018(3)    | 0.003(2)     | 0.001(2)     |
| C(11)  | 0.035(3)   | 0.048(4)  | 0.028(3)   | -0.018(3)    | -0.005(2)    | 0.002(3)     |
| C(12)  | 0.023(3)   | 0.047(4)  | 0.040(3)   | -0.017(3)    | -0.001(2)    | 0.002(3)     |
| C(13)  | 0.026(3)   | 0.049(4)  | 0.033(3)   | -0.019(3)    | -0.003(2)    | 0.001(3)     |
| C(14)  | 0.033(3)   | 0.048(4)  | 0.040(3)   | -0.020(3)    | -0.001(3)    | 0.000(3)     |
| C(15)  | 0.034(3)   | 0.062(5)  | 0.037(3)   | -0.010(3)    | 0.001(3)     | -0.005(3)    |
| C(16)  | 0.029(3)   | 0.074(5)  | 0.025(3)   | -0.013(3)    | -0.001(2)    | 0.010(3)     |
| C(17)  | 0.036(3)   | 0.061(4)  | 0.034(3)   | -0.022(3)    | -0.012(3)    | 0.014(3)     |
| C(18)  | 0.033(3)   | 0.045(4)  | 0.032(3)   | -0.017(3)    | -0.007(2)    | 0.007(3)     |
| C(37A) | 0.105(9)   | 0.092(8)  | 0.095(8)   | -0.015(7)    | -0.016(7)    | 0.020(7)     |
| CI(1A) | 0.116(3)   | 0.124(3)  | 0.142(3)   | -0.040(2)    | -0.015(2)    | 0.001(2)     |
| CI(2A) | 0.165(4)   | 0.091(2)  | 0.085(2)   | -0.0076(18)  | 0.022(2)     | 0.045(3)     |
| C(37B) | 0.105(9)   | 0.092(8)  | 0.095(8)   | -0.015(7)    | -0.016(7)    | 0.020(7)     |
| CI(1B) | 0.116(3)   | 0.124(3)  | 0.142(3)   | -0.040(2)    | -0.015(2)    | 0.001(2)     |
| CI(2B) | 0.165(4)   | 0.091(2)  | 0.085(2)   | -0.0076(18)  | 0.022(2)     | 0.045(3)     |
| N(1)   | 0.038(3)   | 0.056(3)  | 0.028(3)   | -0.013(2)    | 0.003(2)     | -0.012(3)    |
| N(2)   | 0.028(3)   | 0.050(3)  | 0.036(3)   | -0.008(2)    | 0.004(2)     | -0.005(2)    |
| N(3)   | 0.050(3)   | 0.048(3)  | 0.049(3)   | -0.021(3)    | 0.006(3)     | -0.012(3)    |
| C(28)  | 0.031(3)   | 0.050(4)  | 0.039(3)   | -0.017(3)    | -0.004(3)    | 0.000(3)     |
| C(29)  | 0.032(3)   | 0.044(4)  | 0.034(3)   | -0.011(3)    | -0.007(2)    | 0.000(3)     |
| C(30)  | 0.027(3)   | 0.049(4)  | 0.034(3)   | -0.011(3)    | -0.003(2)    | 0.001(3)     |
| C(31)  | 0.058(4)   | 0.063(5)  | 0.034(4)   | -0.007(3)    | 0.005(3)     | -0.011(4)    |

|       |            |            |            |              |              |             |
|-------|------------|------------|------------|--------------|--------------|-------------|
| C(32) | 0.051(4)   | 0.053(4)   | 0.040(4)   | -0.015(3)    | 0.009(3)     | -0.004(3)   |
| C(33) | 0.036(3)   | 0.044(4)   | 0.054(4)   | -0.010(3)    | -0.003(3)    | -0.007(3)   |
| C(34) | 0.036(3)   | 0.069(5)   | 0.036(4)   | -0.007(3)    | 0.007(3)     | -0.005(3)   |
| C(35) | 0.054(4)   | 0.068(5)   | 0.061(5)   | -0.037(4)    | 0.005(4)     | -0.007(4)   |
| C(36) | 0.058(4)   | 0.049(4)   | 0.059(5)   | -0.022(4)    | 0.005(4)     | -0.014(4)   |
| I(3)  | 0.0420(4)  | 0.0344(3)  | 0.0376(3)  | -0.0040(2)   | -0.0057(2)   | -0.0091(2)  |
| CI(3) | 0.0420(4)  | 0.0344(3)  | 0.0376(3)  | -0.0040(2)   | -0.0057(2)   | -0.0091(2)  |
| I(4)  | 0.0396(2)  | 0.0532(3)  | 0.0406(2)  | -0.02463(19) | -0.00145(17) | 0.00556(18) |
| F(13) | 0.039(2)   | 0.056(2)   | 0.050(2)   | -0.0151(19)  | 0.0153(17)   | -0.0129(18) |
| F(14) | 0.050(2)   | 0.043(2)   | 0.066(3)   | -0.018(2)    | -0.0024(19)  | -0.0167(18) |
| F(15) | 0.064(2)   | 0.043(2)   | 0.044(2)   | -0.0233(17)  | -0.0006(18)  | -0.0121(18) |
| F(16) | 0.048(2)   | 0.041(2)   | 0.0330(18) | -0.0124(15)  | 0.0098(15)   | -0.0103(16) |
| F(17) | 0.0366(18) | 0.0269(17) | 0.049(2)   | -0.0114(15)  | 0.0010(15)   | 0.0023(14)  |
| F(18) | 0.0253(16) | 0.040(2)   | 0.060(2)   | -0.0112(17)  | -0.0048(15)  | 0.0033(15)  |
| C(19) | 0.024(3)   | 0.035(3)   | 0.034(3)   | -0.012(3)    | 0.000(2)     | 0.000(2)    |
| C(20) | 0.030(3)   | 0.034(3)   | 0.040(3)   | -0.007(3)    | 0.007(2)     | -0.005(2)   |
| C(21) | 0.037(3)   | 0.029(3)   | 0.044(4)   | -0.007(3)    | -0.003(3)    | -0.008(3)   |
| C(22) | 0.045(4)   | 0.034(3)   | 0.033(3)   | -0.012(3)    | -0.003(3)    | -0.005(3)   |
| C(23) | 0.034(3)   | 0.030(3)   | 0.033(3)   | -0.008(2)    | 0.002(2)     | -0.005(2)   |
| C(24) | 0.029(3)   | 0.030(3)   | 0.031(3)   | -0.011(2)    | 0.001(2)     | 0.000(2)    |
| C(25) | 0.030(3)   | 0.031(3)   | 0.031(3)   | -0.013(2)    | -0.002(2)    | -0.001(2)   |
| C(26) | 0.032(3)   | 0.028(3)   | 0.032(3)   | -0.012(2)    | 0.000(2)     | 0.003(2)    |
| C(27) | 0.024(3)   | 0.035(3)   | 0.034(3)   | -0.010(2)    | 0.000(2)     | 0.000(2)    |

**Table S20.** Atomic coordinates and equivalent isotropic displacement parameters [Å<sup>2</sup>] for **anti-m-1-TDACI**

|       | x           | y           | z           | U(eq)       |
|-------|-------------|-------------|-------------|-------------|
| I(1)  | 0.73278(2)  | 0.05400(5)  | 0.48321(2)  | 0.03569(13) |
| Cl(1) | 0.33087(7)  | 0.1010(2)   | 0.42129(7)  | 0.0407(4)   |
| F(1)  | 0.7402(2)   | 0.3011(6)   | 0.5820(2)   | 0.0502(11)  |
| N(1)  | 0.3901(3)   | 0.5587(10)  | 0.4432(4)   | 0.0528(18)  |
| C(1)  | 0.3005(3)   | 0.6146(9)   | 0.3943(4)   | 0.0420(17)  |
| I(2)  | 0.43586(2)  | 0.11135(6)  | 0.35604(2)  | 0.03637(13) |
| F(2)  | 0.6716(3)   | 0.5139(7)   | 0.6243(2)   | 0.0599(15)  |
| N(2)  | 0.2858(3)   | 0.6835(9)   | 0.3469(3)   | 0.0479(16)  |
| C(2)  | 0.3397(3)   | 0.5650(9)   | 0.4295(4)   | 0.0419(17)  |
| I(3)  | 0.39094(2)  | 0.50431(6)  | 0.03083(2)  | 0.03768(14) |
| F(3)  | 0.5690(3)   | 0.5011(8)   | 0.5942(3)   | 0.0691(16)  |
| N(3)  | 0.2546(3)   | 0.4663(9)   | 0.4737(3)   | 0.0455(15)  |
| C(3)  | 0.2891(3)   | 0.5291(10)  | 0.4400(4)   | 0.0427(17)  |
| C(4)  | 0.4076(4)   | 0.4714(13)  | 0.4913(5)   | 0.062(3)    |
| I(4)  | 0.25932(2)  | 0.22257(5)  | 0.32236(2)  | 0.03317(13) |
| F(4)  | 0.5359(2)   | 0.2753(9)   | 0.5200(3)   | 0.0635(15)  |
| F(5)  | 0.5948(2)   | 0.2707(5)   | 0.4045(2)   | 0.0458(11)  |
| C(5)  | 0.4303(4)   | 0.6347(16)  | 0.4104(6)   | 0.069(3)    |
| F(6)  | 0.6063(2)   | -0.1725(7)  | 0.5276(2)   | 0.0492(11)  |
| C(6)  | 0.3242(4)   | 0.7687(11)  | 0.3143(4)   | 0.055(2)    |
| F(7)  | 0.5638(2)   | -0.3778(6)  | 0.4531(2)   | 0.0535(12)  |
| C(7)  | 0.2309(5)   | 0.7126(12)  | 0.3349(5)   | 0.062(3)    |
| F(8)  | 0.53476(19) | -0.2596(6)  | 0.3543(2)   | 0.0434(10)  |
| C(8)  | 0.2002(3)   | 0.4366(11)  | 0.4550(4)   | 0.0458(18)  |
| F(9)  | 0.64044(19) | 0.0525(8)   | 0.3005(2)   | 0.0541(12)  |
| C(9)  | 0.2737(4)   | 0.3816(11)  | 0.5233(4)   | 0.0474(18)  |
| F(10) | 0.6235(2)   | 0.1865(9)   | 0.2018(2)   | 0.0612(14)  |
| C(10) | 0.6744(3)   | 0.1817(9)   | 0.5250(3)   | 0.0351(14)  |
| C(12) | 0.6551(4)   | 0.4010(10)  | 0.5878(3)   | 0.0458(18)  |
| F(12) | 0.4446(2)   | 0.2186(7)   | 0.2349(2)   | 0.0518(12)  |
| C(11) | 0.6905(3)   | 0.2919(9)   | 0.5652(3)   | 0.0394(16)  |
| F(11) | 0.5248(2)   | 0.2650(8)   | 0.1681(2)   | 0.0590(14)  |
| F(14) | 0.5144(3)   | 0.8547(8)   | 0.1686(2)   | 0.0660(16)  |
| C(14) | 0.5870(3)   | 0.2810(11)  | 0.5346(4)   | 0.0450(18)  |
| C(13) | 0.6037(4)   | 0.3942(11)  | 0.5725(4)   | 0.0481(19)  |
| F(13) | 0.4828(2)   | 0.7468(8)   | 0.0699(2)   | 0.0565(13)  |
| F(15) | 0.4677(2)   | 0.7414(7)   | 0.2590(2)   | 0.0548(13)  |
| C(15) | 0.6216(3)   | 0.1729(9)   | 0.5105(3)   | 0.0352(14)  |
| F(16) | 0.39312(19) | 0.5089(6)   | 0.25113(19) | 0.0425(10)  |
| C(16) | 0.6004(3)   | 0.0564(10)  | 0.4683(3)   | 0.0362(15)  |
| C(17) | 0.5928(3)   | -0.1112(10) | 0.4789(3)   | 0.0379(16)  |
| F(17) | 0.29342(17) | 0.5511(5)   | 0.1860(2)   | 0.0407(10)  |
| F(18) | 0.41765(17) | 0.1677(6)   | 0.1250(2)   | 0.0421(10)  |
| C(18) | 0.5704(3)   | -0.2172(10) | 0.4410(4)   | 0.0396(17)  |
| C(19) | 0.5562(3)   | -0.1563(9)  | 0.3905(3)   | 0.0352(14)  |
| F(19) | 0.3524(2)   | -0.0821(6)  | 0.1469(3)   | 0.0509(12)  |
| C(21) | 0.5861(3)   | 0.1081(9)   | 0.4164(3)   | 0.0350(15)  |
| F(21) | 0.19421(19) | 0.3753(7)   | 0.11629(19) | 0.0461(11)  |
| C(22) | 0.5513(3)   | 0.0753(9)   | 0.3219(3)   | 0.0337(14)  |
| F(22) | 0.0965(2)   | 0.4517(8)   | 0.1462(2)   | 0.0583(14)  |
| C(23) | 0.5916(3)   | 0.0953(11)  | 0.2853(3)   | 0.0401(16)  |
| F(23) | 0.07016(19) | 0.4329(8)   | 0.2522(2)   | 0.0582(14)  |
| C(24) | 0.5834(3)   | 0.1608(11)  | 0.2339(3)   | 0.0438(16)  |
| F(24) | 0.14102(18) | 0.3353(7)   | 0.3277(2)   | 0.0488(11)  |
| C(25) | 0.5333(3)   | 0.2027(10)  | 0.2173(3)   | 0.0416(17)  |

|       |             |            |           |            |
|-------|-------------|------------|-----------|------------|
| C(26) | 0.4923(3)   | 0.1797(9)  | 0.2529(3) | 0.0361(14) |
| C(27) | 0.5003(3)   | 0.1206(9)  | 0.3051(3) | 0.0323(14) |
| C(28) | 0.4198(3)   | 0.5677(9)  | 0.1083(3) | 0.0345(14) |
| C(29) | 0.4598(3)   | 0.6845(11) | 0.1135(3) | 0.0426(16) |
| C(30) | 0.4760(3)   | 0.7410(11) | 0.1644(4) | 0.0444(18) |
| C(31) | 0.4529(3)   | 0.6846(11) | 0.2097(3) | 0.0414(17) |
| C(32) | 0.4142(3)   | 0.5652(9)  | 0.2051(3) | 0.0350(14) |
| C(33) | 0.3978(3)   | 0.5045(8)  | 0.1550(3) | 0.0326(14) |
| C(34) | 0.3580(3)   | 0.3694(9)  | 0.1562(3) | 0.0328(14) |
| C(35) | 0.3711(3)   | 0.2051(10) | 0.1453(3) | 0.0341(14) |
| C(36) | 0.3375(3)   | 0.0748(9)  | 0.1566(3) | 0.0362(15) |
| C(37) | 0.2894(3)   | 0.1068(9)  | 0.1783(3) | 0.0326(14) |
| C(38) | 0.2724(3)   | 0.2695(8)  | 0.1872(3) | 0.0310(13) |
| C(39) | 0.3084(3)   | 0.3950(8)  | 0.1759(3) | 0.0308(13) |
| C(40) | 0.2194(3)   | 0.3079(8)  | 0.2066(3) | 0.0319(13) |
| C(41) | 0.1824(3)   | 0.3613(10) | 0.1679(3) | 0.0381(15) |
| C(42) | 0.1321(3)   | 0.4014(11) | 0.1836(4) | 0.0417(17) |
| C(43) | 0.1183(3)   | 0.3908(10) | 0.2374(4) | 0.0417(17) |
| C(44) | 0.1554(3)   | 0.3413(10) | 0.2757(3) | 0.0384(15) |
| C(45) | 0.2056(3)   | 0.2989(8)  | 0.2613(3) | 0.0315(13) |
| C(20) | 0.5640(3)   | 0.0098(9)  | 0.3770(3) | 0.0327(14) |
| F(20) | 0.25868(19) | -0.0191(6) | 0.1909(2) | 0.0439(10) |
| H(4A) | 0.387651    | 0.368095   | 0.494825  | 0.092      |
| H(4B) | 0.402043    | 0.541194   | 0.523314  | 0.092      |
| H(4C) | 0.444887    | 0.445477   | 0.488623  | 0.092      |
| H(5A) | 0.452398    | 0.547812   | 0.39499   | 0.103      |
| H(5B) | 0.45191     | 0.708555   | 0.433173  | 0.103      |
| H(5C) | 0.413761    | 0.698838   | 0.38094   | 0.103      |
| H(6A) | 0.359482    | 0.734065   | 0.325805  | 0.082      |
| H(6B) | 0.320661    | 0.888921   | 0.319099  | 0.082      |
| H(6C) | 0.318454    | 0.740529   | 0.2759    | 0.082      |
| H(7A) | 0.225169    | 0.715563   | 0.295434  | 0.092      |
| H(7B) | 0.220406    | 0.818906   | 0.350617  | 0.092      |
| H(7C) | 0.210085    | 0.622938   | 0.350439  | 0.092      |
| H(8A) | 0.185998    | 0.538202   | 0.438496  | 0.069      |
| H(8B) | 0.178894    | 0.40508    | 0.486024  | 0.069      |
| H(8C) | 0.199541    | 0.346975   | 0.42812   | 0.069      |
| H(9A) | 0.296752    | 0.289824   | 0.513322  | 0.071      |
| H(9B) | 0.243876    | 0.338086   | 0.543252  | 0.071      |
| H(9C) | 0.293132    | 0.460632   | 0.546228  | 0.071      |

**Table S21.** Anisotropic displacement parameters [ $\text{\AA}^2$ ] for **anti-m-1-TDACI**

|       | U11       | U22        | U33       | U23          | U13          | U12          |
|-------|-----------|------------|-----------|--------------|--------------|--------------|
| I(1)  | 0.0359(2) | 0.0349(2)  | 0.0362(2) | 0.00002(17)  | -0.00114(16) | 0.00188(17)  |
| Cl(1) | 0.0367(8) | 0.0554(10) | 0.0297(8) | 0.0043(7)    | -0.0017(6)   | 0.0025(7)    |
| F(1)  | 0.053(3)  | 0.051(3)   | 0.046(3)  | -0.004(2)    | -0.013(2)    | -0.010(2)    |
| N(1)  | 0.040(4)  | 0.053(4)   | 0.065(5)  | 0.016(4)     | -0.006(3)    | -0.007(3)    |
| C(1)  | 0.044(4)  | 0.033(4)   | 0.049(5)  | -0.004(3)    | -0.006(3)    | 0.001(3)     |
| I(2)  | 0.0321(2) | 0.0419(2)  | 0.0351(2) | 0.00182(17)  | 0.00067(16)  | 0.00187(17)  |
| F(2)  | 0.086(4)  | 0.053(3)   | 0.040(3)  | -0.019(2)    | -0.005(3)    | -0.011(3)    |
| N(2)  | 0.056(4)  | 0.038(3)   | 0.049(4)  | 0.003(3)     | -0.007(3)    | -0.001(3)    |
| C(2)  | 0.046(4)  | 0.028(3)   | 0.051(5)  | 0.003(3)     | -0.004(3)    | -0.002(3)    |
| I(3)  | 0.0419(2) | 0.0423(3)  | 0.0287(2) | -0.00054(17) | -0.00337(16) | -0.00616(17) |
| F(3)  | 0.077(4)  | 0.066(4)   | 0.065(4)  | -0.022(3)    | 0.015(3)     | 0.020(3)     |
| N(3)  | 0.040(3)  | 0.048(4)   | 0.048(4)  | 0.001(3)     | 0.000(3)     | -0.003(3)    |
| C(3)  | 0.044(4)  | 0.036(4)   | 0.047(5)  | -0.003(3)    | -0.006(3)    | 0.003(3)     |
| C(4)  | 0.052(5)  | 0.049(5)   | 0.083(7)  | 0.017(5)     | -0.018(5)    | -0.005(4)    |
| I(4)  | 0.0336(2) | 0.0367(2)  | 0.0290(2) | 0.00053(16)  | -0.00392(15) | 0.00102(16)  |
| F(4)  | 0.042(3)  | 0.083(4)   | 0.065(4)  | -0.019(3)    | -0.003(2)    | 0.018(2)     |
| F(5)  | 0.063(3)  | 0.034(2)   | 0.040(2)  | 0.0006(18)   | -0.012(2)    | -0.0051(19)  |
| C(5)  | 0.052(5)  | 0.069(6)   | 0.086(8)  | 0.026(6)     | -0.002(5)    | -0.014(5)    |
| F(6)  | 0.061(3)  | 0.051(3)   | 0.035(2)  | 0.008(2)     | -0.014(2)    | -0.003(2)    |
| C(6)  | 0.075(6)  | 0.040(4)   | 0.049(5)  | 0.004(4)     | 0.008(4)     | 0.009(4)     |
| F(7)  | 0.062(3)  | 0.042(3)   | 0.055(3)  | 0.010(2)     | -0.012(2)    | -0.012(2)    |
| C(7)  | 0.070(6)  | 0.047(5)   | 0.066(6)  | 0.003(4)     | -0.028(5)    | 0.002(4)     |
| F(8)  | 0.045(2)  | 0.043(2)   | 0.042(2)  | -0.0057(19)  | -0.0074(18)  | -0.0086(18)  |
| C(8)  | 0.038(4)  | 0.047(5)   | 0.053(5)  | -0.010(4)    | 0.001(3)     | -0.002(3)    |
| F(9)  | 0.034(2)  | 0.080(4)   | 0.048(3)  | 0.004(3)     | -0.002(2)    | 0.002(2)     |
| C(9)  | 0.053(5)  | 0.045(4)   | 0.045(5)  | 0.004(3)     | 0.004(4)     | -0.001(3)    |
| F(10) | 0.049(3)  | 0.093(4)   | 0.042(3)  | 0.007(3)     | 0.013(2)     | -0.015(3)    |
| C(10) | 0.044(4)  | 0.036(3)   | 0.026(3)  | 0.000(3)     | 0.002(3)     | 0.005(3)     |
| C(12) | 0.069(6)  | 0.037(4)   | 0.031(4)  | -0.006(3)    | 0.001(4)     | -0.003(4)    |
| F(12) | 0.044(2)  | 0.071(3)   | 0.040(3)  | 0.011(2)     | -0.009(2)    | 0.008(2)     |
| C(11) | 0.051(4)  | 0.038(4)   | 0.029(4)  | 0.005(3)     | -0.004(3)    | -0.003(3)    |
| F(11) | 0.068(3)  | 0.075(4)   | 0.033(3)  | 0.016(2)     | -0.002(2)    | -0.010(3)    |
| F(14) | 0.068(3)  | 0.071(4)   | 0.059(3)  | -0.011(3)    | -0.002(3)    | -0.042(3)    |
| C(14) | 0.040(4)  | 0.056(5)   | 0.040(4)  | -0.005(3)    | 0.000(3)     | 0.009(3)     |
| C(13) | 0.060(5)  | 0.044(4)   | 0.040(4)  | -0.005(3)    | 0.006(4)     | 0.011(4)     |
| F(13) | 0.058(3)  | 0.066(3)   | 0.045(3)  | 0.004(2)     | 0.003(2)     | -0.025(2)    |
| F(15) | 0.059(3)  | 0.062(3)   | 0.043(3)  | -0.019(2)    | -0.009(2)    | -0.015(2)    |
| C(15) | 0.042(4)  | 0.035(3)   | 0.028(3)  | -0.001(3)    | -0.004(3)    | 0.005(3)     |
| F(16) | 0.049(2)  | 0.048(2)   | 0.030(2)  | -0.0052(17)  | 0.0024(19)   | -0.0054(18)  |
| C(16) | 0.031(3)  | 0.045(4)   | 0.033(4)  | -0.001(3)    | -0.002(3)    | 0.003(3)     |
| C(17) | 0.034(4)  | 0.042(4)   | 0.037(4)  | 0.005(3)     | -0.007(3)    | 0.004(3)     |
| F(17) | 0.039(2)  | 0.030(2)   | 0.053(3)  | -0.0038(18)  | 0.0059(19)   | 0.0005(16)   |
| F(18) | 0.035(2)  | 0.045(2)   | 0.047(3)  | -0.0071(19)  | 0.0022(18)   | 0.0039(18)   |
| C(18) | 0.040(4)  | 0.036(4)   | 0.043(4)  | 0.003(3)     | -0.005(3)    | -0.005(3)    |
| C(19) | 0.030(3)  | 0.037(4)   | 0.039(4)  | -0.002(3)    | -0.006(3)    | -0.001(3)    |

|       |          |          |          |             |             |             |
|-------|----------|----------|----------|-------------|-------------|-------------|
| F(19) | 0.050(3) | 0.030(2) | 0.072(3) | -0.008(2)   | 0.005(2)    | 0.0045(19)  |
| C(21) | 0.035(3) | 0.036(4) | 0.034(4) | 0.002(3)    | -0.002(3)   | 0.002(3)    |
| F(21) | 0.048(3) | 0.059(3) | 0.031(2) | 0.0072(19)  | -0.0038(19) | 0.006(2)    |
| C(22) | 0.033(3) | 0.037(3) | 0.031(4) | -0.003(3)   | -0.005(3)   | 0.000(3)    |
| F(22) | 0.042(3) | 0.081(4) | 0.052(3) | 0.010(3)    | -0.013(2)   | 0.018(2)    |
| C(23) | 0.029(3) | 0.050(4) | 0.042(4) | -0.007(3)   | -0.001(3)   | -0.004(3)   |
| F(23) | 0.031(2) | 0.080(4) | 0.063(3) | 0.010(3)    | 0.002(2)    | 0.012(2)    |
| C(24) | 0.047(4) | 0.048(4) | 0.038(4) | -0.006(3)   | 0.006(3)    | -0.010(3)   |
| F(24) | 0.039(2) | 0.069(3) | 0.038(2) | 0.006(2)    | 0.0074(18)  | 0.005(2)    |
| C(25) | 0.049(4) | 0.041(4) | 0.034(4) | 0.001(3)    | -0.004(3)   | -0.006(3)   |
| C(26) | 0.039(4) | 0.039(4) | 0.031(4) | 0.001(3)    | -0.004(3)   | -0.003(3)   |
| C(27) | 0.030(3) | 0.034(3) | 0.033(4) | -0.003(3)   | 0.003(3)    | -0.003(2)   |
| C(28) | 0.039(4) | 0.035(3) | 0.030(4) | -0.004(3)   | -0.005(3)   | -0.003(3)   |
| C(29) | 0.043(4) | 0.048(4) | 0.038(4) | -0.004(3)   | 0.006(3)    | -0.011(3)   |
| C(30) | 0.036(4) | 0.041(4) | 0.056(5) | -0.006(3)   | -0.004(3)   | -0.012(3)   |
| C(31) | 0.039(4) | 0.046(4) | 0.039(4) | -0.013(3)   | -0.009(3)   | 0.000(3)    |
| C(32) | 0.035(3) | 0.034(3) | 0.036(4) | -0.005(3)   | 0.002(3)    | 0.003(3)    |
| C(33) | 0.031(3) | 0.033(4) | 0.033(4) | 0.000(3)    | -0.002(3)   | -0.002(3)   |
| C(34) | 0.031(3) | 0.034(3) | 0.033(3) | -0.001(3)   | -0.008(3)   | -0.002(3)   |
| C(35) | 0.031(3) | 0.042(4) | 0.030(3) | -0.002(3)   | -0.001(3)   | 0.002(3)    |
| C(36) | 0.044(4) | 0.028(3) | 0.036(4) | -0.005(3)   | -0.006(3)   | 0.007(3)    |
| C(37) | 0.035(3) | 0.031(3) | 0.032(4) | 0.002(3)    | -0.004(3)   | -0.003(3)   |
| C(38) | 0.037(4) | 0.028(3) | 0.028(3) | -0.001(2)   | -0.004(3)   | 0.000(2)    |
| C(39) | 0.031(3) | 0.029(3) | 0.032(3) | -0.004(2)   | -0.003(3)   | 0.000(2)    |
| C(40) | 0.034(3) | 0.028(3) | 0.033(3) | 0.001(3)    | -0.004(3)   | -0.001(3)   |
| C(41) | 0.039(4) | 0.041(4) | 0.034(4) | 0.003(3)    | -0.004(3)   | 0.001(3)    |
| C(42) | 0.036(4) | 0.048(4) | 0.041(4) | 0.006(3)    | -0.008(3)   | 0.004(3)    |
| C(43) | 0.029(3) | 0.045(4) | 0.051(5) | 0.002(3)    | 0.000(3)    | 0.003(3)    |
| C(44) | 0.036(4) | 0.045(4) | 0.035(4) | 0.002(3)    | -0.002(3)   | -0.002(3)   |
| C(45) | 0.032(3) | 0.029(3) | 0.034(3) | 0.003(2)    | -0.007(3)   | 0.000(2)    |
| C(20) | 0.027(3) | 0.037(4) | 0.034(4) | -0.002(3)   | 0.000(3)    | 0.002(3)    |
| F(20) | 0.046(2) | 0.032(2) | 0.054(3) | -0.0001(18) | -0.001(2)   | -0.0051(17) |

**Table S22.** Atomic coordinates and equivalent isotropic displacement parameters [Å<sup>2</sup>] for **syn-m-1-TEABr**

|       | x           | y           | z           | U(eq)       |
|-------|-------------|-------------|-------------|-------------|
| I(1)  | 0.16685(6)  | -0.13001(4) | 0.67593(2)  | 0.04710(14) |
| I(2)  | 0.13857(6)  | 0.14244(4)  | 0.68883(2)  | 0.04931(15) |
| F(1)  | 0.0422(5)   | -0.3005(3)  | 0.64695(18) | 0.0598(15)  |
| F(2)  | -0.0326(5)  | -0.3309(4)  | 0.5737(2)   | 0.0640(16)  |
| F(3)  | 0.0035(6)   | -0.2049(4)  | 0.50631(18) | 0.0660(16)  |
| F(4)  | 0.1224(6)   | -0.0515(4)  | 0.51217(15) | 0.0544(13)  |
| F(5)  | 0.4123(5)   | -0.0883(4)  | 0.5739(3)   | 0.084(2)    |
| F(6)  | 0.5443(6)   | 0.0614(5)   | 0.5757(3)   | 0.120(4)    |
| F(7)  | 0.4150(6)   | 0.2190(4)   | 0.5875(3)   | 0.082(2)    |
| F(8)  | 0.1655(6)   | 0.3063(4)   | 0.53120(16) | 0.0596(14)  |
| F(9)  | 0.0400(7)   | 0.4643(4)   | 0.5440(2)   | 0.080(2)    |
| F(10) | -0.0414(6)  | 0.4817(4)   | 0.6203(2)   | 0.0753(18)  |
| F(11) | -0.0015(6)  | 0.3419(4)   | 0.68217(19) | 0.0678(16)  |
| F(48) | 0.0206(4)   | 0.0756(3)   | 0.59585(18) | 0.0512(13)  |
| C(1)  | 0.1210(8)   | -0.1577(6)  | 0.6181(2)   | 0.0368(18)  |
| C(2)  | 0.0624(8)   | -0.2368(5)  | 0.6145(3)   | 0.0406(19)  |
| C(3)  | 0.0231(8)   | -0.2539(6)  | 0.5771(3)   | 0.047(2)    |
| C(4)  | 0.0421(8)   | -0.1897(6)  | 0.5430(3)   | 0.046(2)    |
| C(5)  | 0.1019(8)   | -0.1111(6)  | 0.5466(3)   | 0.0396(19)  |
| C(6)  | 0.1438(8)   | -0.0945(5)  | 0.5832(2)   | 0.0360(17)  |
| C(7)  | 0.2118(7)   | -0.0094(5)  | 0.5846(2)   | 0.0339(17)  |
| C(8)  | 0.1511(8)   | 0.0714(5)   | 0.5908(2)   | 0.0349(17)  |
| C(9)  | 0.2125(8)   | 0.1526(5)   | 0.5920(2)   | 0.0354(17)  |
| C(10) | 0.3474(9)   | 0.1448(6)   | 0.5864(3)   | 0.050(2)    |
| C(11) | 0.4136(9)   | 0.0664(7)   | 0.5812(4)   | 0.063(3)    |
| C(12) | 0.3471(9)   | -0.0107(6)  | 0.5802(3)   | 0.051(2)    |
| C(13) | 0.1440(8)   | 0.2382(6)   | 0.5998(3)   | 0.0406(19)  |
| C(14) | 0.1209(9)   | 0.3125(6)   | 0.5685(3)   | 0.050(2)    |
| C(15) | 0.0570(9)   | 0.3932(6)   | 0.5754(4)   | 0.056(3)    |
| C(16) | 0.0175(9)   | 0.4027(7)   | 0.6136(4)   | 0.058(3)    |
| C(17) | 0.0392(9)   | 0.3309(7)   | 0.6440(3)   | 0.052(2)    |
| C(18) | 0.1008(8)   | 0.2483(6)   | 0.6391(3)   | 0.0400(19)  |
| N(1)  | 0.8130(7)   | 0.5122(5)   | 0.2440(2)   | 0.0457(17)  |
| C(72) | 0.9309(11)  | 0.4558(8)   | 0.2634(4)   | 0.076(3)    |
| C(73) | 0.9834(14)  | 0.3808(10)  | 0.2409(6)   | 0.122(7)    |
| C(74) | 0.6996(11)  | 0.4536(8)   | 0.2397(4)   | 0.068(3)    |
| C(75) | 0.6581(12)  | 0.3964(10)  | 0.2778(5)   | 0.096(5)    |
| C(76) | 0.8411(13)  | 0.5621(9)   | 0.2021(4)   | 0.081(4)    |
| C(77) | 0.9517(13)  | 0.6273(9)   | 0.2001(4)   | 0.092(4)    |
| C(78) | 0.7757(13)  | 0.5801(10)  | 0.2712(4)   | 0.086(4)    |
| C(79) | 0.6577(13)  | 0.6472(10)  | 0.2560(5)   | 0.095(4)    |
| Br(1) | 0.79197(11) | 0.03902(8)  | 0.24139(3)  | 0.0569(3)   |
| N(2)  | 0.3121(7)   | 0.0009(5)   | 0.2560(2)   | 0.0442(17)  |
| C(80) | 0.4926(12)  | -0.1267(8)  | 0.2520(4)   | 0.077(3)    |
| C(81) | 0.2645(13)  | 0.0929(8)   | 0.2321(4)   | 0.078(3)    |
| C(82) | 0.1455(12)  | 0.1398(9)   | 0.2478(4)   | 0.084(4)    |
| C(83) | 0.3433(12)  | 0.0075(11)  | 0.2996(3)   | 0.085(4)    |
| C(84) | 0.4505(13)  | 0.0753(14)  | 0.3020(6)   | 0.137(8)    |
| C(85) | 0.2050(11)  | -0.0658(9)  | 0.2588(4)   | 0.079(4)    |
| C(86) | 0.1567(14)  | -0.0850(12) | 0.2191(6)   | 0.122(7)    |
| C(88) | 0.4309(10)  | -0.0329(8)  | 0.2341(3)   | 0.063(3)    |
| Br(2) | 0.30125(11) | 0.54070(7)  | 0.25784(3)  | 0.0548(3)   |
| I(3)  | 0.30681(6)  | 0.36014(4)  | 0.33036(2)  | 0.04581(14) |
| I(4)  | 0.33411(6)  | 0.64951(4)  | 0.33626(2)  | 0.04573(14) |
| F(12) | 0.1960(5)   | 0.1608(4)   | 0.35220(18) | 0.0601(15)  |

|       |            |             |              |             |
|-------|------------|-------------|--------------|-------------|
| F(13) | 0.1921(6)  | 0.0407(4)   | 0.4217(2)    | 0.0734(19)  |
| F(14) | 0.3092(7)  | 0.0744(4)   | 0.4901(2)    | 0.087(2)    |
| F(15) | 0.4268(6)  | 0.2313(4)   | 0.48846(16)  | 0.0631(15)  |
| F(16) | 0.2628(4)  | 0.4450(3)   | 0.43946(15)  | 0.0433(11)  |
| F(17) | 0.6350(5)  | 0.2905(3)   | 0.39512(17)  | 0.0498(12)  |
| F(18) | 0.7626(5)  | 0.4451(4)   | 0.3856(2)    | 0.0696(18)  |
| F(19) | 0.6383(5)  | 0.6004(3)   | 0.4015(2)    | 0.0624(16)  |
| F(20) | 0.2264(6)  | 0.8275(4)   | 0.37168(16)  | 0.0582(14)  |
| F(21) | 0.2063(5)  | 0.8606(3)   | 0.44805(17)  | 0.0542(13)  |
| F(22) | 0.2915(6)  | 0.7327(4)   | 0.51180(16)  | 0.0627(15)  |
| F(23) | 0.4040(6)  | 0.5717(4)   | 0.49895(15)  | 0.0646(16)  |
| C(19) | 0.3138(8)  | 0.2618(6)   | 0.3833(3)    | 0.0376(18)  |
| C(20) | 0.2558(8)  | 0.1805(6)   | 0.3858(3)    | 0.044(2)    |
| C(21) | 0.2516(9)  | 0.1186(6)   | 0.4211(3)    | 0.051(2)    |
| C(22) | 0.3081(10) | 0.1366(6)   | 0.4558(3)    | 0.055(3)    |
| C(23) | 0.3703(8)  | 0.2167(6)   | 0.4543(3)    | 0.042(2)    |
| C(24) | 0.3741(7)  | 0.2795(5)   | 0.4189(2)    | 0.0332(17)  |
| C(25) | 0.4452(7)  | 0.3640(5)   | 0.4180(2)    | 0.0299(16)  |
| C(26) | 0.5740(8)  | 0.3668(5)   | 0.4044(2)    | 0.0356(17)  |
| C(27) | 0.6380(8)  | 0.4461(6)   | 0.3993(3)    | 0.043(2)    |
| C(28) | 0.5743(8)  | 0.5230(6)   | 0.4078(3)    | 0.0413(19)  |
| C(29) | 0.4463(8)  | 0.5261(5)   | 0.4215(2)    | 0.0348(17)  |
| C(30) | 0.3873(7)  | 0.4453(5)   | 0.4267(2)    | 0.0335(17)  |
| C(31) | 0.3777(8)  | 0.6147(5)   | 0.4280(2)    | 0.0348(17)  |
| C(32) | 0.3614(9)  | 0.6325(6)   | 0.4667(3)    | 0.043(2)    |
| C(33) | 0.3034(8)  | 0.7156(6)   | 0.4737(3)    | 0.0419(19)  |
| C(34) | 0.2590(8)  | 0.7810(6)   | 0.4415(3)    | 0.0421(19)  |
| C(35) | 0.2724(8)  | 0.7622(5)   | 0.4027(3)    | 0.0386(18)  |
| C(36) | 0.3297(7)  | 0.6806(5)   | 0.3954(2)    | 0.0335(17)  |
| I(5)  | 0.80935(6) | -0.08530(4) | 0.16675(2)   | 0.05054(15) |
| I(6)  | 0.81825(6) | 0.20675(4)  | 0.16160(2)   | 0.04554(14) |
| F(24) | 0.6918(5)  | -0.2592(4)  | 0.13809(19)  | 0.0637(16)  |
| F(25) | 0.6626(5)  | -0.3039(4)  | 0.0644(2)    | 0.0697(18)  |
| F(26) | 0.7626(6)  | -0.2007(5)  | -0.0026(2)   | 0.0759(19)  |
| F(27) | 0.8949(6)  | -0.0556(4)  | 0.00561(16)  | 0.0661(16)  |
| F(28) | 0.7638(5)  | 0.1061(3)   | 0.06047(16)  | 0.0483(12)  |
| F(29) | 1.1249(5)  | -0.0995(4)  | 0.1037(2)    | 0.0716(19)  |
| F(30) | 1.2653(5)  | 0.0408(4)   | 0.1149(3)    | 0.088(2)    |
| F(31) | 1.1569(5)  | 0.2134(4)   | 0.0981(2)    | 0.0640(16)  |
| F(32) | 0.9678(5)  | 0.2885(4)   | 0.00457(15)  | 0.0560(13)  |
| F(33) | 0.8550(7)  | 0.4610(4)   | -0.00612(17) | 0.0700(17)  |
| F(34) | 0.7189(6)  | 0.5206(4)   | 0.05528(18)  | 0.0634(15)  |
| F(35) | 0.7053(6)  | 0.4129(4)   | 0.12814(17)  | 0.0599(14)  |
| C(37) | 0.8085(8)  | -0.1304(6)  | 0.1102(3)    | 0.0401(19)  |
| C(38) | 0.7444(8)  | -0.2070(6)  | 0.1056(3)    | 0.046(2)    |
| C(39) | 0.7289(8)  | -0.2311(6)  | 0.0683(4)    | 0.054(3)    |
| C(40) | 0.7783(9)  | -0.1787(7)  | 0.0351(3)    | 0.055(2)    |
| C(41) | 0.8453(9)  | -0.1030(6)  | 0.0392(3)    | 0.048(2)    |
| C(42) | 0.8950(8)  | 0.2593(6)   | 0.0725(2)    | 0.0367(18)  |
| C(43) | 0.9401(8)  | 0.0007(5)   | 0.0800(2)    | 0.0362(18)  |
| C(44) | 1.0696(9)  | -0.0140(6)  | 0.0940(3)    | 0.049(2)    |
| C(45) | 1.1415(8)  | 0.0572(7)   | 0.0998(3)    | 0.052(2)    |
| C(46) | 1.0869(8)  | 0.1449(6)   | 0.0916(3)    | 0.046(2)    |
| C(47) | 0.9578(8)  | 0.1647(5)   | 0.0780(2)    | 0.0345(17)  |
| C(48) | 0.8894(7)  | 0.0903(6)   | 0.0727(2)    | 0.0345(17)  |
| C(49) | 0.9029(8)  | 0.3179(6)   | 0.0365(2)    | 0.042(2)    |
| C(50) | 0.8442(9)  | 0.4043(6)   | 0.0297(3)    | 0.047(2)    |
| C(51) | 0.7757(9)  | 0.4361(6)   | 0.0610(3)    | 0.045(2)    |



|        |            |            |             |             |
|--------|------------|------------|-------------|-------------|
| C(52)  | 0.7701(8)  | 0.3792(6)  | 0.0983(3)   | 0.043(2)    |
| C(53)  | 0.8285(7)  | 0.2914(5)  | 0.1047(2)   | 0.0345(17)  |
| C(87)  | 0.8636(8)  | -0.0794(6) | 0.0766(3)   | 0.0398(19)  |
| I(7)   | 0.34952(6) | 0.68723(4) | 0.17540(2)  | 0.04165(13) |
| I(8)   | 0.35284(6) | 0.40085(4) | 0.19217(2)  | 0.04957(15) |
| F(36)  | 0.4690(5)  | 0.8810(3)  | 0.14504(14) | 0.0452(11)  |
| F(37)  | 0.5004(5)  | 0.9783(3)  | 0.07068(15) | 0.0520(13)  |
| F(38)  | 0.4129(6)  | 0.9191(4)  | 0.00406(15) | 0.0663(17)  |
| F(39)  | 0.3020(6)  | 0.7562(4)  | 0.01198(14) | 0.0594(15)  |
| F(40)  | 0.4662(4)  | 0.5586(3)  | 0.08694(17) | 0.0493(12)  |
| F(41)  | 0.0568(5)  | 0.7219(3)  | 0.08789(18) | 0.0510(13)  |
| F(42)  | -0.0615(5) | 0.5633(4)  | 0.1013(2)   | 0.0696(18)  |
| F(43)  | 0.0827(5)  | 0.4029(3)  | 0.1076(2)   | 0.0609(15)  |
| F(44)  | 0.3593(6)  | 0.3876(4)  | 0.03167(16) | 0.0663(16)  |
| F(45)  | 0.4810(6)  | 0.2193(5)  | 0.0416(2)   | 0.078(2)    |
| F(46)  | 0.5378(5)  | 0.1258(4)  | 0.1176(2)   | 0.0720(18)  |
| F(47)  | 0.4842(6)  | 0.2040(4)  | 0.18247(19) | 0.0678(17)  |
| C(54)  | 0.3727(7)  | 0.7654(5)  | 0.1174(2)   | 0.0324(16)  |
| C(55)  | 0.4271(7)  | 0.8479(5)  | 0.1124(2)   | 0.0314(16)  |
| C(56)  | 0.4437(8)  | 0.8996(5)  | 0.0747(2)   | 0.0369(18)  |
| C(57)  | 0.3999(9)  | 0.8687(6)  | 0.0406(2)   | 0.043(2)    |
| C(58)  | 0.3431(9)  | 0.7855(6)  | 0.0454(2)   | 0.0403(19)  |
| C(59)  | 0.3306(7)  | 0.7339(5)  | 0.0828(2)   | 0.0303(16)  |
| C(60)  | 0.2651(7)  | 0.6445(5)  | 0.0866(2)   | 0.0314(16)  |
| C(61)  | 0.1304(8)  | 0.6433(6)  | 0.0897(3)   | 0.0378(18)  |
| C(62)  | 0.0716(8)  | 0.5614(6)  | 0.0967(3)   | 0.049(2)    |
| C(63)  | 0.1437(8)  | 0.4811(5)  | 0.1001(3)   | 0.0385(19)  |
| C(64)  | 0.2783(8)  | 0.4751(5)  | 0.0966(2)   | 0.0357(17)  |
| C(65)  | 0.3351(7)  | 0.5603(5)  | 0.0896(2)   | 0.0316(16)  |
| C(66)  | 0.3558(8)  | 0.3855(6)  | 0.1020(3)   | 0.0391(18)  |
| C(67)  | 0.3901(9)  | 0.3456(6)  | 0.0694(3)   | 0.049(2)    |
| C(68)  | 0.4521(9)  | 0.2586(7)  | 0.0739(3)   | 0.054(3)    |
| C(69)  | 0.4812(8)  | 0.2114(6)  | 0.1123(3)   | 0.050(2)    |
| C(70)  | 0.4514(8)  | 0.2517(6)  | 0.1456(3)   | 0.048(2)    |
| C(71)  | 0.3907(8)  | 0.3391(6)  | 0.1409(3)   | 0.0397(19)  |
| H(72A) | 0.907972   | 0.427418   | 0.291362    | 0.091       |
| H(72B) | 1.001566   | 0.4971     | 0.265593    | 0.091       |
| H(73A) | 0.930192   | 0.327852   | 0.24741     | 0.182       |
| H(73B) | 1.074642   | 0.362408   | 0.249282    | 0.182       |
| H(73C) | 0.979297   | 0.403631   | 0.211514    | 0.182       |
| H(74A) | 0.623295   | 0.494527   | 0.228056    | 0.082       |
| H(74B) | 0.724442   | 0.412772   | 0.219964    | 0.082       |
| H(75A) | 0.604707   | 0.34853    | 0.271089    | 0.144       |
| H(75B) | 0.606218   | 0.434947   | 0.293933    | 0.144       |
| H(75C) | 0.735782   | 0.367945   | 0.293453    | 0.144       |
| H(76A) | 0.75995    | 0.597789   | 0.190789    | 0.098       |
| H(76B) | 0.864148   | 0.516205   | 0.184394    | 0.098       |
| H(77A) | 0.941523   | 0.673449   | 0.175228    | 0.138       |
| H(77B) | 1.036603   | 0.592321   | 0.199793    | 0.138       |
| H(77C) | 0.947668   | 0.657847   | 0.223939    | 0.138       |
| H(78A) | 0.852155   | 0.615879   | 0.274271    | 0.103       |
| H(78B) | 0.755349   | 0.546132   | 0.298442    | 0.103       |
| H(79A) | 0.688957   | 0.703534   | 0.240281    | 0.143       |
| H(79B) | 0.607444   | 0.661971   | 0.279342    | 0.143       |
| H(79C) | 0.601441   | 0.618875   | 0.238583    | 0.143       |
| H(80A) | 0.428711   | -0.172765  | 0.251278    | 0.116       |
| H(80B) | 0.519593   | -0.127319  | 0.280243    | 0.116       |
| H(80C) | 0.569539   | -0.141019  | 0.236007    | 0.116       |

|        |          |           |          |       |
|--------|----------|-----------|----------|-------|
| H(81A) | 0.336967 | 0.134222  | 0.230857 | 0.094 |
| H(81B) | 0.245501 | 0.084935  | 0.203815 | 0.094 |
| H(82A) | 0.102295 | 0.183242  | 0.225407 | 0.126 |
| H(82B) | 0.171727 | 0.172936  | 0.269146 | 0.126 |
| H(82C) | 0.084638 | 0.093972  | 0.258979 | 0.126 |
| H(83A) | 0.37377  | -0.053915 | 0.314494 | 0.102 |
| H(83B) | 0.262648 | 0.028399  | 0.312843 | 0.102 |
| H(84A) | 0.532518 | 0.052224  | 0.290858 | 0.206 |
| H(84B) | 0.464801 | 0.080991  | 0.330556 | 0.206 |
| H(84C) | 0.42216  | 0.135509  | 0.286293 | 0.206 |
| H(85A) | 0.238451 | -0.124563 | 0.27554  | 0.095 |
| H(85B) | 0.129605 | -0.041156 | 0.273257 | 0.095 |
| H(86A) | 0.225584 | -0.120388 | 0.206746 | 0.182 |
| H(86B) | 0.133871 | -0.026976 | 0.200717 | 0.182 |
| H(86C) | 0.078841 | -0.120347 | 0.223614 | 0.182 |
| H(88A) | 0.405029 | -0.033578 | 0.205555 | 0.075 |
| H(88B) | 0.498466 | 0.011982  | 0.233525 | 0.075 |

**Table S23.** Anisotropic displacement parameters [Å<sup>2</sup>] for **syn-m-1-TEABr**

|       | U11       | U22       | U33       | U23        | U13        | U12        |
|-------|-----------|-----------|-----------|------------|------------|------------|
| I(1)  | 0.0485(3) | 0.0464(3) | 0.0441(3) | 0.0001(2)  | -0.0024(2) | -0.0063(3) |
| I(2)  | 0.0462(3) | 0.0547(4) | 0.0473(3) | -0.0099(2) | -0.0027(2) | -0.0025(3) |
| F(1)  | 0.056(3)  | 0.038(3)  | 0.080(4)  | 0.009(3)   | 0.007(3)   | -0.011(3)  |
| F(2)  | 0.052(3)  | 0.045(3)  | 0.104(5)  | -0.029(3)  | 0.013(3)   | -0.026(3)  |
| F(3)  | 0.066(4)  | 0.075(4)  | 0.068(4)  | -0.033(3)  | -0.001(3)  | -0.030(3)  |
| F(4)  | 0.068(4)  | 0.053(3)  | 0.046(3)  | -0.012(2)  | -0.001(2)  | -0.020(3)  |
| F(5)  | 0.037(3)  | 0.042(3)  | 0.183(8)  | -0.041(4)  | 0.022(4)   | -0.005(3)  |
| F(6)  | 0.032(3)  | 0.061(4)  | 0.278(12) | -0.058(6)  | 0.039(5)   | -0.016(3)  |
| F(7)  | 0.044(3)  | 0.047(3)  | 0.163(7)  | -0.034(4)  | 0.011(4)   | -0.020(3)  |
| F(8)  | 0.074(4)  | 0.050(3)  | 0.054(3)  | -0.006(2)  | -0.009(3)  | -0.005(3)  |
| F(9)  | 0.094(5)  | 0.038(3)  | 0.100(5)  | 0.009(3)   | -0.019(4)  | 0.009(3)   |
| F(10) | 0.059(4)  | 0.044(3)  | 0.123(6)  | -0.023(3)  | -0.005(4)  | 0.014(3)   |
| F(11) | 0.053(3)  | 0.079(4)  | 0.080(4)  | -0.044(3)  | -0.005(3)  | 0.007(3)   |
| F(48) | 0.027(2)  | 0.042(3)  | 0.090(4)  | -0.026(3)  | -0.001(2)  | -0.004(2)  |
| C(1)  | 0.030(4)  | 0.035(4)  | 0.046(4)  | -0.009(3)  | 0.003(3)   | -0.002(3)  |
| C(2)  | 0.033(4)  | 0.028(4)  | 0.060(5)  | -0.003(4)  | 0.009(4)   | -0.005(4)  |
| C(3)  | 0.033(5)  | 0.034(5)  | 0.080(6)  | -0.019(4)  | 0.009(4)   | -0.012(4)  |
| C(4)  | 0.032(5)  | 0.049(5)  | 0.061(5)  | -0.026(4)  | 0.001(4)   | -0.009(4)  |
| C(5)  | 0.040(5)  | 0.036(4)  | 0.047(5)  | -0.015(4)  | 0.009(4)   | -0.012(4)  |
| C(6)  | 0.027(4)  | 0.033(4)  | 0.048(4)  | -0.006(3)  | 0.003(3)   | -0.006(3)  |
| C(7)  | 0.029(4)  | 0.033(4)  | 0.039(4)  | -0.003(3)  | 0.000(3)   | -0.007(3)  |
| C(8)  | 0.030(4)  | 0.034(4)  | 0.043(4)  | -0.010(3)  | -0.003(3)  | -0.005(3)  |
| C(9)  | 0.034(4)  | 0.028(4)  | 0.045(4)  | -0.008(3)  | -0.003(3)  | -0.002(3)  |
| C(10) | 0.037(5)  | 0.033(5)  | 0.083(7)  | -0.016(4)  | 0.002(4)   | -0.013(4)  |
| C(11) | 0.028(5)  | 0.044(6)  | 0.121(9)  | -0.022(6)  | 0.014(5)   | -0.011(4)  |
| C(12) | 0.033(5)  | 0.034(5)  | 0.087(7)  | -0.016(4)  | 0.012(5)   | -0.001(4)  |
| C(13) | 0.033(4)  | 0.032(4)  | 0.060(5)  | -0.015(4)  | -0.013(4)  | -0.005(4)  |
| C(14) | 0.046(5)  | 0.046(5)  | 0.057(6)  | -0.006(4)  | -0.015(4)  | -0.011(4)  |
| C(15) | 0.042(5)  | 0.034(5)  | 0.089(8)  | -0.006(5)  | -0.020(5)  | 0.006(4)   |
| C(16) | 0.040(5)  | 0.041(6)  | 0.097(8)  | -0.026(5)  | -0.016(5)  | 0.002(4)   |
| C(17) | 0.038(5)  | 0.045(6)  | 0.077(7)  | -0.024(5)  | -0.015(5)  | 0.002(4)   |
| C(18) | 0.037(5)  | 0.039(5)  | 0.044(4)  | -0.009(4)  | -0.010(4)  | -0.003(4)  |
| N(1)  | 0.035(4)  | 0.052(5)  | 0.048(4)  | -0.003(3)  | -0.008(3)  | -0.005(3)  |
| C(72) | 0.051(6)  | 0.075(8)  | 0.092(9)  | 0.012(7)   | -0.014(6)  | 0.001(6)   |
| C(73) | 0.059(8)  | 0.076(10) | 0.23(2)   | -0.050(12) | 0.014(11)  | 0.021(7)   |
| C(74) | 0.055(6)  | 0.062(7)  | 0.088(8)  | -0.012(6)  | -0.009(6)  | -0.016(5)  |
| C(75) | 0.055(7)  | 0.094(10) | 0.122(11) | 0.033(8)   | -0.003(7)  | -0.019(7)  |
| C(76) | 0.079(9)  | 0.097(10) | 0.064(7)  | 0.002(6)   | 0.000(6)   | -0.020(7)  |
| C(77) | 0.075(9)  | 0.089(9)  | 0.099(10) | 0.029(8)   | 0.007(7)   | -0.022(7)  |
| C(78) | 0.081(9)  | 0.111(11) | 0.072(8)  | -0.029(7)  | -0.001(7)  | -0.015(8)  |
| C(79) | 0.061(8)  | 0.087(10) | 0.139(13) | -0.026(9)  | 0.002(8)   | 0.007(7)   |
| Br(1) | 0.0645(6) | 0.0704(7) | 0.0338(4) | -0.0011(4) | -0.0038(4) | -0.0113(5) |
| N(2)  | 0.036(4)  | 0.050(4)  | 0.047(4)  | -0.008(3)  | 0.007(3)   | -0.006(3)  |
| C(80) | 0.062(7)  | 0.075(8)  | 0.098(9)  | -0.025(7)  | 0.003(6)   | 0.001(6)   |
| C(81) | 0.084(9)  | 0.062(7)  | 0.080(8)  | 0.004(6)   | 0.015(7)   | 0.007(6)   |
| C(82) | 0.063(8)  | 0.071(8)  | 0.117(11) | -0.018(7)  | -0.001(7)  | 0.015(6)   |
| C(83) | 0.068(8)  | 0.139(13) | 0.050(6)  | -0.025(7)  | -0.012(5)  | 0.010(8)   |
| C(84) | 0.055(8)  | 0.24(2)   | 0.161(16) | -0.143(16) | 0.012(9)   | -0.030(11) |
| C(85) | 0.048(6)  | 0.069(8)  | 0.126(11) | -0.030(7)  | 0.012(7)   | -0.010(6)  |
| C(86) | 0.071(9)  | 0.156(16) | 0.169(16) | -0.110(14) | -0.012(10) | -0.016(10) |
| C(88) | 0.048(6)  | 0.079(8)  | 0.063(6)  | -0.014(5)  | 0.015(5)   | -0.012(5)  |
| Br(2) | 0.0735(7) | 0.0588(6) | 0.0301(4) | -0.0016(4) | 0.0026(4)  | -0.0063(5) |
| I(3)  | 0.0463(3) | 0.0542(3) | 0.0376(3) | -0.0062(2) | 0.0002(2)  | -0.0123(3) |
| I(4)  | 0.0460(3) | 0.0516(3) | 0.0371(3) | -0.0037(2) | 0.0007(2)  | 0.0040(3)  |
| F(12) | 0.049(3)  | 0.060(3)  | 0.081(4)  | -0.036(3)  | 0.005(3)   | -0.016(3)  |
| F(13) | 0.050(3)  | 0.035(3)  | 0.134(6)  | -0.005(3)  | 0.005(3)   | -0.018(3)  |

|       |           |           |           |            |            |            |
|-------|-----------|-----------|-----------|------------|------------|------------|
| F(14) | 0.081(5)  | 0.066(4)  | 0.097(5)  | 0.044(4)   | -0.006(4)  | -0.023(4)  |
| F(15) | 0.068(4)  | 0.069(4)  | 0.047(3)  | 0.010(3)   | -0.007(3)  | -0.016(3)  |
| F(16) | 0.036(3)  | 0.034(2)  | 0.060(3)  | -0.009(2)  | 0.014(2)   | 0.000(2)   |
| F(17) | 0.037(3)  | 0.034(3)  | 0.082(4)  | -0.021(2)  | 0.009(2)   | 0.001(2)   |
| F(18) | 0.029(3)  | 0.051(3)  | 0.135(6)  | -0.031(3)  | 0.021(3)   | -0.008(2)  |
| F(19) | 0.039(3)  | 0.037(3)  | 0.115(5)  | -0.020(3)  | 0.005(3)   | -0.010(2)  |
| F(20) | 0.064(4)  | 0.042(3)  | 0.060(3)  | 0.009(2)   | 0.005(3)   | 0.017(3)   |
| F(21) | 0.053(3)  | 0.037(3)  | 0.073(3)  | -0.016(2)  | -0.001(3)  | 0.012(2)   |
| F(22) | 0.069(4)  | 0.073(4)  | 0.049(3)  | -0.028(3)  | -0.013(3)  | 0.022(3)   |
| F(23) | 0.083(4)  | 0.065(4)  | 0.041(3)  | -0.013(2)  | -0.017(3)  | 0.036(3)   |
| C(19) | 0.026(4)  | 0.037(4)  | 0.049(5)  | -0.001(3)  | 0.005(3)   | -0.005(3)  |
| C(20) | 0.030(4)  | 0.043(5)  | 0.061(5)  | -0.015(4)  | 0.000(4)   | -0.003(4)  |
| C(21) | 0.032(5)  | 0.030(5)  | 0.090(7)  | -0.005(4)  | 0.008(5)   | -0.008(4)  |
| C(22) | 0.048(5)  | 0.037(5)  | 0.069(6)  | 0.020(4)   | 0.008(5)   | -0.005(4)  |
| C(23) | 0.033(4)  | 0.048(5)  | 0.042(4)  | 0.005(4)   | 0.002(4)   | -0.006(4)  |
| C(24) | 0.031(4)  | 0.031(4)  | 0.037(4)  | -0.001(3)  | 0.006(3)   | -0.004(3)  |
| C(25) | 0.027(4)  | 0.027(4)  | 0.034(4)  | 0.000(3)   | -0.004(3)  | 0.000(3)   |
| C(26) | 0.032(4)  | 0.027(4)  | 0.048(4)  | -0.010(3)  | -0.001(3)  | 0.007(3)   |
| C(27) | 0.022(4)  | 0.050(5)  | 0.061(5)  | -0.017(4)  | 0.005(4)   | -0.002(4)  |
| C(28) | 0.030(4)  | 0.035(5)  | 0.061(5)  | -0.012(4)  | -0.003(4)  | -0.009(4)  |
| C(29) | 0.034(4)  | 0.031(4)  | 0.039(4)  | -0.008(3)  | -0.009(3)  | 0.007(3)   |
| C(30) | 0.026(4)  | 0.040(5)  | 0.036(4)  | -0.010(3)  | -0.002(3)  | -0.002(3)  |
| C(31) | 0.032(4)  | 0.028(4)  | 0.044(4)  | -0.005(3)  | -0.009(3)  | 0.001(3)   |
| C(32) | 0.045(5)  | 0.040(5)  | 0.042(4)  | -0.012(4)  | -0.014(4)  | 0.013(4)   |
| C(33) | 0.039(5)  | 0.041(5)  | 0.048(5)  | -0.018(4)  | -0.008(4)  | 0.008(4)   |
| C(34) | 0.036(5)  | 0.035(5)  | 0.055(5)  | -0.010(4)  | -0.006(4)  | 0.007(4)   |
| C(35) | 0.033(4)  | 0.031(4)  | 0.050(5)  | -0.003(3)  | -0.001(4)  | 0.002(4)   |
| C(36) | 0.029(4)  | 0.034(4)  | 0.037(4)  | -0.005(3)  | -0.002(3)  | -0.003(3)  |
| I(5)  | 0.0421(3) | 0.0621(4) | 0.0456(3) | -0.0009(3) | -0.0033(2) | -0.0122(3) |
| I(6)  | 0.0425(3) | 0.0525(3) | 0.0408(3) | -0.0064(2) | 0.0011(2)  | -0.0013(3) |
| F(24) | 0.048(3)  | 0.041(3)  | 0.095(4)  | 0.013(3)   | -0.003(3)  | -0.012(3)  |
| F(25) | 0.042(3)  | 0.044(3)  | 0.130(6)  | -0.031(3)  | 0.002(3)   | -0.013(3)  |
| F(26) | 0.057(4)  | 0.103(5)  | 0.085(4)  | -0.059(4)  | 0.009(3)   | -0.026(4)  |
| F(27) | 0.067(4)  | 0.089(4)  | 0.052(3)  | -0.026(3)  | 0.014(3)   | -0.036(3)  |
| F(28) | 0.033(3)  | 0.037(3)  | 0.072(3)  | -0.002(2)  | -0.019(2)  | -0.004(2)  |
| F(29) | 0.035(3)  | 0.036(3)  | 0.146(6)  | -0.023(3)  | -0.013(3)  | 0.005(2)   |
| F(30) | 0.028(3)  | 0.054(4)  | 0.186(8)  | -0.035(4)  | -0.032(4)  | 0.005(3)   |
| F(31) | 0.034(3)  | 0.040(3)  | 0.125(5)  | -0.031(3)  | -0.010(3)  | -0.009(2)  |
| F(32) | 0.061(3)  | 0.055(3)  | 0.049(3)  | -0.005(2)  | 0.009(2)   | 0.008(3)   |
| F(33) | 0.089(5)  | 0.054(3)  | 0.056(3)  | 0.014(3)   | -0.002(3)  | 0.011(3)   |
| F(34) | 0.062(4)  | 0.044(3)  | 0.080(4)  | -0.007(3)  | -0.010(3)  | 0.017(3)   |
| F(35) | 0.060(3)  | 0.056(3)  | 0.064(3)  | -0.017(3)  | 0.003(3)   | 0.014(3)   |
| C(37) | 0.034(4)  | 0.034(4)  | 0.052(5)  | -0.003(4)  | 0.002(4)   | -0.008(4)  |
| C(38) | 0.026(4)  | 0.036(5)  | 0.074(6)  | -0.005(4)  | -0.001(4)  | -0.003(4)  |
| C(39) | 0.024(4)  | 0.041(5)  | 0.101(8)  | -0.028(5)  | -0.003(5)  | -0.005(4)  |
| C(40) | 0.035(5)  | 0.060(6)  | 0.078(7)  | -0.036(5)  | 0.007(5)   | -0.004(5)  |
| C(41) | 0.038(5)  | 0.049(5)  | 0.059(5)  | -0.012(4)  | -0.002(4)  | -0.012(4)  |
| C(42) | 0.028(4)  | 0.037(4)  | 0.044(4)  | -0.005(3)  | -0.004(3)  | 0.001(3)   |
| C(43) | 0.029(4)  | 0.034(4)  | 0.048(4)  | -0.012(3)  | 0.004(3)   | -0.009(3)  |
| C(44) | 0.035(5)  | 0.028(4)  | 0.087(7)  | -0.018(4)  | -0.001(4)  | 0.004(4)   |
| C(45) | 0.018(4)  | 0.050(6)  | 0.092(7)  | -0.021(5)  | -0.010(4)  | -0.001(4)  |
| C(46) | 0.029(4)  | 0.039(5)  | 0.072(6)  | -0.017(4)  | -0.001(4)  | -0.008(4)  |
| C(47) | 0.029(4)  | 0.034(4)  | 0.041(4)  | -0.009(3)  | 0.001(3)   | -0.002(3)  |
| C(48) | 0.022(4)  | 0.043(5)  | 0.036(4)  | 0.000(3)   | -0.003(3)  | -0.004(3)  |
| C(49) | 0.037(5)  | 0.051(5)  | 0.039(4)  | -0.006(4)  | 0.001(4)   | -0.003(4)  |
| C(50) | 0.050(5)  | 0.047(5)  | 0.041(5)  | 0.000(4)   | -0.002(4)  | 0.000(4)   |
| C(51) | 0.042(5)  | 0.030(4)  | 0.061(5)  | -0.009(4)  | -0.011(4)  | 0.010(4)   |
| C(52) | 0.036(5)  | 0.044(5)  | 0.051(5)  | -0.014(4)  | -0.004(4)  | 0.004(4)   |

|       |           |           |           |            |            |            |
|-------|-----------|-----------|-----------|------------|------------|------------|
| C(53) | 0.029(4)  | 0.035(4)  | 0.039(4)  | -0.002(3)  | -0.004(3)  | -0.006(3)  |
| C(87) | 0.025(4)  | 0.037(5)  | 0.059(5)  | -0.011(4)  | -0.002(4)  | -0.005(4)  |
| I(7)  | 0.0498(3) | 0.0414(3) | 0.0334(2) | -0.0031(2) | -0.0021(2) | -0.0089(2) |
| I(8)  | 0.0480(3) | 0.0562(4) | 0.0421(3) | -0.0036(2) | 0.0053(2)  | 0.0010(3)  |
| F(36) | 0.047(3)  | 0.045(3)  | 0.048(3)  | -0.016(2)  | -0.007(2)  | -0.010(2)  |
| F(37) | 0.062(3)  | 0.040(3)  | 0.056(3)  | -0.007(2)  | 0.006(2)   | -0.026(3)  |
| F(38) | 0.100(5)  | 0.062(4)  | 0.040(3)  | 0.000(2)   | 0.007(3)   | -0.046(3)  |
| F(39) | 0.088(4)  | 0.058(3)  | 0.036(3)  | -0.008(2)  | -0.003(3)  | -0.038(3)  |
| F(40) | 0.026(2)  | 0.042(3)  | 0.079(4)  | -0.006(2)  | 0.007(2)   | -0.005(2)  |
| F(41) | 0.033(3)  | 0.031(3)  | 0.089(4)  | -0.014(2)  | -0.001(2)  | 0.004(2)   |
| F(42) | 0.025(3)  | 0.050(3)  | 0.138(6)  | -0.026(3)  | 0.009(3)   | -0.010(2)  |
| F(43) | 0.040(3)  | 0.034(3)  | 0.111(5)  | -0.015(3)  | 0.004(3)   | -0.016(2)  |
| F(44) | 0.069(4)  | 0.081(4)  | 0.050(3)  | -0.024(3)  | -0.009(3)  | 0.018(3)   |
| F(45) | 0.066(4)  | 0.082(4)  | 0.100(5)  | -0.061(4)  | -0.015(3)  | 0.018(3)   |
| F(46) | 0.045(3)  | 0.041(3)  | 0.132(6)  | -0.024(3)  | -0.004(3)  | 0.007(3)   |
| F(47) | 0.059(4)  | 0.052(3)  | 0.079(4)  | 0.019(3)   | 0.016(3)   | 0.010(3)   |
| C(54) | 0.028(4)  | 0.034(4)  | 0.034(4)  | -0.001(3)  | -0.002(3)  | -0.002(3)  |
| C(55) | 0.029(4)  | 0.031(4)  | 0.036(4)  | -0.009(3)  | -0.002(3)  | -0.005(3)  |
| C(56) | 0.039(5)  | 0.027(4)  | 0.048(4)  | -0.010(3)  | 0.006(4)   | -0.011(4)  |
| C(57) | 0.049(5)  | 0.042(5)  | 0.037(4)  | 0.001(4)   | 0.001(4)   | -0.017(4)  |
| C(58) | 0.047(5)  | 0.042(5)  | 0.036(4)  | -0.012(3)  | 0.002(4)   | -0.015(4)  |
| C(59) | 0.027(4)  | 0.024(4)  | 0.039(4)  | -0.002(3)  | 0.001(3)   | -0.006(3)  |
| C(60) | 0.032(4)  | 0.028(4)  | 0.035(4)  | -0.005(3)  | 0.004(3)   | -0.008(3)  |
| C(61) | 0.030(4)  | 0.036(5)  | 0.049(5)  | -0.012(4)  | 0.000(3)   | -0.002(4)  |
| C(62) | 0.024(4)  | 0.051(6)  | 0.072(6)  | -0.010(4)  | -0.005(4)  | -0.007(4)  |
| C(63) | 0.030(4)  | 0.028(4)  | 0.060(5)  | -0.009(4)  | 0.005(4)   | -0.009(4)  |
| C(64) | 0.034(4)  | 0.034(4)  | 0.041(4)  | -0.010(3)  | 0.002(3)   | -0.008(4)  |
| C(65) | 0.023(4)  | 0.033(4)  | 0.039(4)  | -0.006(3)  | 0.000(3)   | -0.007(3)  |
| C(66) | 0.025(4)  | 0.040(5)  | 0.055(5)  | -0.016(4)  | 0.002(3)   | -0.003(4)  |
| C(67) | 0.036(5)  | 0.047(5)  | 0.069(6)  | -0.025(5)  | -0.009(4)  | -0.001(4)  |
| C(68) | 0.038(5)  | 0.048(6)  | 0.086(7)  | -0.041(5)  | -0.004(5)  | 0.001(4)   |
| C(69) | 0.029(5)  | 0.037(5)  | 0.087(7)  | -0.016(5)  | 0.000(4)   | 0.000(4)   |
| C(70) | 0.032(5)  | 0.037(5)  | 0.073(6)  | 0.001(4)   | 0.000(4)   | -0.006(4)  |
| C(71) | 0.033(4)  | 0.036(5)  | 0.050(5)  | -0.007(4)  | 0.007(4)   | -0.008(4)  |

**Table S24.** Atomic coordinates and equivalent isotropic displacement parameters [Å<sup>2</sup>] for **syn-m-1-TDAI**

|       | x          | y           | z           | U(eq)       |
|-------|------------|-------------|-------------|-------------|
| I(1)  | 0.46498(3) | 0.26964(9)  | 0.40633(2)  | 0.04048(15) |
| I(2)  | 0.64588(2) | 0.32230(7)  | 0.42846(2)  | 0.02835(12) |
| F(1)  | 0.3161(3)  | 0.3610(9)   | 0.39828(10) | 0.0633(18)  |
| F(2)  | 0.2079(3)  | 0.2986(10)  | 0.41944(12) | 0.074(2)    |
| F(3)  | 0.2140(3)  | 0.1442(10)  | 0.45648(12) | 0.075(2)    |
| F(4)  | 0.3291(3)  | 0.0454(8)   | 0.47214(9)  | 0.0500(15)  |
| F(5)  | 0.4255(3)  | -0.1995(6)  | 0.44948(8)  | 0.0376(12)  |
| F(6)  | 0.5414(3)  | -0.2889(6)  | 0.46582(9)  | 0.0414(13)  |
| F(7)  | 0.6255(3)  | -0.0374(7)  | 0.47721(9)  | 0.0402(13)  |
| F(8)  | 0.4784(2)  | 0.4010(6)   | 0.45653(8)  | 0.0343(12)  |
| F(9)  | 0.5595(3)  | 0.3266(8)   | 0.50614(7)  | 0.0497(16)  |
| F(10) | 0.6449(3)  | 0.5764(8)   | 0.51817(8)  | 0.0551(17)  |
| F(11) | 0.7339(3)  | 0.7054(8)   | 0.49161(9)  | 0.0531(15)  |
| F(12) | 0.7345(3)  | 0.5919(8)   | 0.45288(9)  | 0.0524(16)  |
| C(10) | 0.3819(4)  | 0.2360(12)  | 0.42420(14) | 0.033(2)    |
| C(11) | 0.3218(5)  | 0.2834(14)  | 0.41670(15) | 0.045(2)    |
| C(12) | 0.2654(5)  | 0.2516(14)  | 0.42744(19) | 0.050(3)    |
| C(13) | 0.2691(4)  | 0.1720(14)  | 0.44587(19) | 0.049(3)    |
| C(14) | 0.3289(5)  | 0.1237(13)  | 0.45383(15) | 0.038(2)    |
| C(15) | 0.3859(4)  | 0.1547(11)  | 0.44332(13) | 0.0273(18)  |
| C(16) | 0.4490(4)  | 0.1044(11)  | 0.45274(12) | 0.0257(17)  |
| C(17) | 0.4661(4)  | -0.0728(11) | 0.45558(12) | 0.0271(18)  |
| C(18) | 0.5248(4)  | -0.1188(11) | 0.46387(13) | 0.0308(19)  |
| C(19) | 0.5678(4)  | 0.0110(11)  | 0.46950(12) | 0.0271(18)  |
| C(20) | 0.5540(4)  | 0.1894(10)  | 0.46712(11) | 0.0231(17)  |
| C(21) | 0.4938(4)  | 0.2303(10)  | 0.45894(11) | 0.0221(16)  |
| C(22) | 0.6017(4)  | 0.3275(9)   | 0.47284(12) | 0.0202(16)  |
| C(23) | 0.6026(4)  | 0.3891(11)  | 0.49272(12) | 0.0275(18)  |
| C(24) | 0.6469(5)  | 0.5180(12)  | 0.49905(13) | 0.033(2)    |
| C(25) | 0.6905(5)  | 0.5819(11)  | 0.48543(14) | 0.034(2)    |
| C(26) | 0.6910(4)  | 0.5229(12)  | 0.46581(13) | 0.0301(19)  |
| C(27) | 0.6467(4)  | 0.3966(10)  | 0.45930(11) | 0.0213(16)  |
| N(1)  | 0.4594(4)  | 0.7251(13)  | 0.37212(18) | 0.061(3)    |
| N(2)  | 0.6158(4)  | 0.7473(10)  | 0.39913(12) | 0.0412(19)  |
| N(3)  | 0.6130(4)  | 0.6609(11)  | 0.34454(12) | 0.0405(19)  |
| C(1)  | 0.4221(6)  | 0.6942(17)  | 0.3537(3)   | 0.092(6)    |
| C(2)  | 0.4241(6)  | 0.7676(16)  | 0.3903(3)   | 0.085(5)    |
| C(3)  | 0.5835(7)  | 0.8007(15)  | 0.41751(16) | 0.058(3)    |
| C(4)  | 0.6857(5)  | 0.7590(14)  | 0.39830(18) | 0.056(3)    |
| C(5)  | 0.6828(5)  | 0.6375(17)  | 0.34481(18) | 0.058(3)    |
| C(6)  | 0.5768(7)  | 0.6282(15)  | 0.32581(16) | 0.059(3)    |
| C(7)  | 0.5239(4)  | 0.7174(12)  | 0.37186(15) | 0.036(2)    |
| C(8)  | 0.5821(4)  | 0.7276(12)  | 0.38204(14) | 0.0315(19)  |
| C(9)  | 0.5808(4)  | 0.6916(11)  | 0.36144(14) | 0.0315(19)  |
| I(3)  | 0.47410(2) | 0.19940(8)  | 0.34760(2)  | 0.03158(13) |
| I(4)  | 0.64475(2) | 0.10802(7)  | 0.32265(2)  | 0.02728(12) |
| F(13) | 0.3292(3)  | 0.0915(9)   | 0.35826(9)  | 0.0538(16)  |
| F(14) | 0.2188(3)  | 0.0868(10)  | 0.33690(12) | 0.069(2)    |
| F(15) | 0.2179(3)  | 0.1915(11)  | 0.29742(12) | 0.079(2)    |
| F(16) | 0.3279(3)  | 0.3023(9)   | 0.27959(8)  | 0.0517(15)  |
| F(17) | 0.4909(2)  | 0.0239(6)   | 0.29961(7)  | 0.0290(10)  |
| F(18) | 0.4101(3)  | 0.6040(7)   | 0.29595(9)  | 0.0444(14)  |
| F(19) | 0.5153(3)  | 0.7029(7)   | 0.27409(9)  | 0.0519(16)  |
| F(20) | 0.6093(3)  | 0.4664(7)   | 0.26568(8)  | 0.0416(13)  |
| F(21) | 0.5679(3)  | 0.1191(8)   | 0.24374(8)  | 0.0461(14)  |

|        |            |             |             |             |
|--------|------------|-------------|-------------|-------------|
| F(22)  | 0.6569(3)  | -0.1202(9)  | 0.23189(9)  | 0.0612(18)  |
| F(23)  | 0.7405(3)  | -0.2588(9)  | 0.25940(9)  | 0.0635(19)  |
| F(24)  | 0.7360(3)  | -0.1568(9)  | 0.29839(9)  | 0.0596(19)  |
| C(28)  | 0.3885(4)  | 0.1983(12)  | 0.32986(13) | 0.0288(18)  |
| C(29)  | 0.3317(4)  | 0.1443(13)  | 0.33868(14) | 0.037(2)    |
| C(30)  | 0.2741(5)  | 0.1418(13)  | 0.32778(17) | 0.043(2)    |
| C(31)  | 0.2737(4)  | 0.1945(15)  | 0.30795(17) | 0.047(3)    |
| C(32)  | 0.3306(4)  | 0.2510(12)  | 0.29919(14) | 0.032(2)    |
| C(33)  | 0.3885(4)  | 0.2525(11)  | 0.30955(12) | 0.0264(18)  |
| C(34)  | 0.4478(4)  | 0.3110(11)  | 0.29875(12) | 0.0255(17)  |
| C(35)  | 0.4981(4)  | 0.1934(10)  | 0.29396(11) | 0.0211(16)  |
| C(36)  | 0.5536(4)  | 0.2389(10)  | 0.28312(11) | 0.0210(16)  |
| C(37)  | 0.5569(4)  | 0.4116(12)  | 0.27649(13) | 0.032(2)    |
| C(38)  | 0.5092(5)  | 0.5352(12)  | 0.28058(14) | 0.033(2)    |
| C(39)  | 0.4565(4)  | 0.4830(12)  | 0.29163(13) | 0.0287(18)  |
| C(40)  | 0.6046(4)  | 0.1075(10)  | 0.27775(12) | 0.0214(16)  |
| C(41)  | 0.6088(4)  | 0.0519(12)  | 0.25772(12) | 0.0299(19)  |
| C(42)  | 0.6539(5)  | -0.0681(12) | 0.25145(13) | 0.036(2)    |
| C(43)  | 0.6964(5)  | -0.1391(12) | 0.26543(15) | 0.040(2)    |
| C(44)  | 0.6922(4)  | -0.0864(13) | 0.28537(13) | 0.036(2)    |
| C(45)  | 0.6477(4)  | 0.0370(11)  | 0.29176(11) | 0.0221(16)  |
| I(5)   | 0.61764(3) | 0.21830(8)  | 0.37560(2)  | 0.03090(13) |
| H(1A)  | 0.37739    | 0.735475    | 0.355707    | 0.138       |
| H(1AB) | 0.421835   | 0.567256    | 0.350637    | 0.138       |
| H(1AC) | 0.441957   | 0.759       | 0.342419    | 0.138       |
| H(2A)  | 0.395561   | 0.868985    | 0.387726    | 0.128       |
| H(2AB) | 0.454848   | 0.797363    | 0.40115     | 0.128       |
| H(2AC) | 0.397909   | 0.665389    | 0.394426    | 0.128       |
| H(3A)  | 0.564588   | 0.918694    | 0.41565     | 0.087       |
| H(3AB) | 0.615005   | 0.804059    | 0.42868     | 0.087       |
| H(3AC) | 0.548996   | 0.715866    | 0.42073     | 0.087       |
| H(4A)  | 0.702947   | 0.659142    | 0.390467    | 0.083       |
| H(4AB) | 0.703409   | 0.755518    | 0.412111    | 0.083       |
| H(4AC) | 0.698328   | 0.870381    | 0.39175     | 0.083       |
| H(5A)  | 0.699052   | 0.63039     | 0.330838    | 0.086       |
| H(5AB) | 0.69359    | 0.527963    | 0.352045    | 0.086       |
| H(5AC) | 0.703101   | 0.738263    | 0.351718    | 0.086       |
| H(6A)  | 0.542457   | 0.717324    | 0.324357    | 0.088       |
| H(6AB) | 0.557208   | 0.509973    | 0.326333    | 0.088       |
| H(6AC) | 0.606383   | 0.635403    | 0.314177    | 0.088       |

Table S25. Anisotropic displacement parameters [ $\text{\AA}^2$ ] for syn-m-1-TDAI

|       | U11       | U22       | U33       | U23       | U13         | U12        |
|-------|-----------|-----------|-----------|-----------|-------------|------------|
| I(1)  | 0.0433(3) | 0.0489(4) | 0.0292(3) | 0.0063(3) | -0.0028(2)  | -0.0027(3) |
| I(2)  | 0.0271(3) | 0.0327(3) | 0.0253(2) | 0.0018(2) | 0.00310(19) | -0.0015(2) |
| F(1)  | 0.057(4)  | 0.068(4)  | 0.065(4)  | 0.005(3)  | -0.027(3)   | 0.013(3)   |
| F(2)  | 0.033(3)  | 0.072(5)  | 0.118(6)  | -0.025(4) | -0.029(4)   | 0.018(3)   |
| F(3)  | 0.029(3)  | 0.088(5)  | 0.108(6)  | -0.019(5) | 0.020(3)    | -0.004(3)  |
| F(4)  | 0.040(3)  | 0.055(4)  | 0.055(4)  | -0.001(3) | 0.019(3)    | -0.012(3)  |
| F(5)  | 0.044(3)  | 0.016(3)  | 0.052(3)  | -0.004(2) | -0.001(2)   | -0.012(2)  |
| F(6)  | 0.042(3)  | 0.016(3)  | 0.066(4)  | 0.005(2)  | -0.004(3)   | -0.004(2)  |
| F(7)  | 0.037(3)  | 0.025(3)  | 0.058(3)  | 0.007(2)  | -0.011(2)   | 0.002(2)   |
| F(8)  | 0.039(3)  | 0.013(2)  | 0.050(3)  | -0.003(2) | -0.007(2)   | -0.002(2)  |
| F(9)  | 0.064(4)  | 0.061(4)  | 0.024(3)  | -0.006(2) | 0.014(2)    | -0.030(3)  |
| F(10) | 0.070(4)  | 0.062(4)  | 0.034(3)  | -0.022(3) | -0.002(3)   | -0.020(3)  |
| F(11) | 0.048(3)  | 0.050(4)  | 0.061(4)  | -0.012(3) | -0.010(3)   | -0.027(3)  |
| F(12) | 0.039(3)  | 0.065(4)  | 0.053(3)  | 0.004(3)  | 0.004(3)    | -0.032(3)  |
| C(10) | 0.021(4)  | 0.038(5)  | 0.041(5)  | -0.010(4) | -0.006(3)   | 0.001(4)   |
| C(11) | 0.048(6)  | 0.041(6)  | 0.045(6)  | -0.009(5) | -0.017(5)   | 0.006(5)   |
| C(12) | 0.027(5)  | 0.044(6)  | 0.080(8)  | -0.019(6) | -0.015(5)   | 0.009(4)   |
| C(13) | 0.021(5)  | 0.043(6)  | 0.083(8)  | -0.021(6) | 0.006(5)    | 0.002(4)   |
| C(14) | 0.036(5)  | 0.031(5)  | 0.046(6)  | -0.011(4) | 0.006(4)    | -0.009(4)  |
| C(15) | 0.025(4)  | 0.019(4)  | 0.038(5)  | -0.011(3) | -0.003(3)   | -0.006(3)  |
| C(16) | 0.027(4)  | 0.024(5)  | 0.025(4)  | -0.003(3) | 0.004(3)    | 0.003(3)   |
| C(17) | 0.036(5)  | 0.018(4)  | 0.027(4)  | -0.003(3) | 0.009(3)    | -0.007(4)  |
| C(18) | 0.043(5)  | 0.013(4)  | 0.036(5)  | 0.004(3)  | 0.007(4)    | -0.004(4)  |
| C(19) | 0.022(4)  | 0.029(5)  | 0.030(4)  | 0.002(3)  | 0.001(3)    | 0.004(3)   |
| C(20) | 0.028(4)  | 0.018(4)  | 0.023(4)  | -0.002(3) | 0.002(3)    | -0.008(3)  |
| C(21) | 0.026(4)  | 0.014(4)  | 0.026(4)  | -0.003(3) | 0.002(3)    | -0.002(3)  |
| C(22) | 0.021(4)  | 0.008(4)  | 0.031(4)  | -0.003(3) | -0.004(3)   | -0.004(3)  |
| C(23) | 0.035(5)  | 0.026(5)  | 0.022(4)  | 0.000(3)  | 0.004(3)    | -0.004(4)  |
| C(24) | 0.045(5)  | 0.026(5)  | 0.028(4)  | -0.006(4) | -0.002(4)   | -0.006(4)  |
| C(25) | 0.040(5)  | 0.014(4)  | 0.047(5)  | -0.003(4) | -0.009(4)   | -0.007(4)  |
| C(26) | 0.023(4)  | 0.034(5)  | 0.034(5)  | 0.006(4)  | -0.001(3)   | -0.009(4)  |
| C(27) | 0.025(4)  | 0.018(4)  | 0.022(4)  | 0.003(3)  | 0.002(3)    | -0.004(3)  |
| N(1)  | 0.021(4)  | 0.045(6)  | 0.118(9)  | -0.002(6) | 0.006(5)    | 0.001(4)   |
| N(2)  | 0.053(5)  | 0.029(5)  | 0.041(4)  | 0.003(3)  | -0.005(4)   | -0.003(4)  |
| N(3)  | 0.044(5)  | 0.038(5)  | 0.039(4)  | 0.008(4)  | 0.001(4)    | -0.001(4)  |
| C(1)  | 0.052(8)  | 0.046(8)  | 0.178(17) | -0.017(9) | -0.057(9)   | 0.008(6)   |
| C(2)  | 0.050(7)  | 0.038(7)  | 0.168(16) | 0.008(8)  | 0.052(9)    | 0.006(6)   |
| C(3)  | 0.096(9)  | 0.031(6)  | 0.046(6)  | -0.002(5) | 0.002(6)    | 0.003(6)   |
| C(4)  | 0.043(6)  | 0.040(6)  | 0.083(8)  | 0.012(6)  | -0.035(6)   | 0.000(5)   |
| C(5)  | 0.045(6)  | 0.068(8)  | 0.060(7)  | 0.005(6)  | 0.020(5)    | 0.005(6)   |
| C(6)  | 0.092(9)  | 0.039(7)  | 0.045(6)  | 0.002(5)  | -0.003(6)   | -0.019(6)  |
| C(7)  | 0.029(5)  | 0.021(5)  | 0.059(6)  | 0.006(4)  | -0.001(4)   | 0.003(4)   |
| C(8)  | 0.028(4)  | 0.024(5)  | 0.043(5)  | 0.006(4)  | -0.002(4)   | 0.004(4)   |
| C(9)  | 0.027(4)  | 0.022(5)  | 0.045(5)  | 0.007(4)  | -0.005(4)   | -0.004(4)  |
| I(3)  | 0.0285(3) | 0.0432(3) | 0.0230(2) | 0.0025(2) | 0.00068(19) | 0.0026(2)  |



|       |           |           |           |           |              |            |
|-------|-----------|-----------|-----------|-----------|--------------|------------|
| I(4)  | 0.0209(2) | 0.0378(3) | 0.0231(2) | 0.0039(2) | -0.00219(18) | 0.0026(2)  |
| F(13) | 0.043(3)  | 0.070(4)  | 0.048(3)  | 0.016(3)  | 0.020(3)     | 0.003(3)   |
| F(14) | 0.018(3)  | 0.087(5)  | 0.102(5)  | 0.022(4)  | 0.018(3)     | -0.008(3)  |
| F(15) | 0.024(3)  | 0.116(6)  | 0.097(5)  | 0.025(5)  | -0.017(3)    | -0.014(4)  |
| F(16) | 0.031(3)  | 0.081(4)  | 0.043(3)  | 0.012(3)  | -0.016(2)    | -0.002(3)  |
| F(17) | 0.028(2)  | 0.024(3)  | 0.034(3)  | 0.001(2)  | 0.0045(19)   | 0.001(2)   |
| F(18) | 0.034(3)  | 0.036(3)  | 0.063(4)  | 0.007(3)  | 0.008(3)     | 0.021(2)   |
| F(19) | 0.063(4)  | 0.024(3)  | 0.069(4)  | 0.016(3)  | 0.019(3)     | 0.011(3)   |
| F(20) | 0.037(3)  | 0.034(3)  | 0.053(3)  | 0.009(2)  | 0.021(2)     | 0.000(2)   |
| F(21) | 0.039(3)  | 0.073(4)  | 0.027(3)  | -0.004(3) | -0.007(2)    | 0.021(3)   |
| F(22) | 0.068(4)  | 0.080(5)  | 0.036(3)  | -0.024(3) | 0.004(3)     | 0.018(4)   |
| F(23) | 0.067(4)  | 0.066(4)  | 0.058(4)  | -0.001(3) | 0.018(3)     | 0.044(4)   |
| F(24) | 0.050(4)  | 0.081(5)  | 0.047(3)  | 0.016(3)  | 0.005(3)     | 0.047(3)   |
| C(28) | 0.016(4)  | 0.035(5)  | 0.036(4)  | 0.000(4)  | -0.001(3)    | 0.007(4)   |
| C(29) | 0.032(5)  | 0.041(6)  | 0.037(5)  | 0.008(4)  | 0.011(4)     | 0.002(4)   |
| C(30) | 0.027(5)  | 0.034(6)  | 0.069(7)  | 0.011(5)  | 0.008(4)     | -0.001(4)  |
| C(31) | 0.020(4)  | 0.052(6)  | 0.068(7)  | 0.008(5)  | -0.011(4)    | -0.001(4)  |
| C(32) | 0.017(4)  | 0.032(5)  | 0.048(5)  | 0.002(4)  | -0.005(3)    | 0.002(3)   |
| C(33) | 0.022(4)  | 0.024(5)  | 0.033(4)  | -0.001(3) | 0.001(3)     | 0.004(3)   |
| C(34) | 0.021(4)  | 0.032(5)  | 0.024(4)  | 0.002(3)  | -0.006(3)    | 0.007(3)   |
| C(35) | 0.019(4)  | 0.024(4)  | 0.020(4)  | 0.002(3)  | -0.005(3)    | -0.005(3)  |
| C(36) | 0.023(4)  | 0.020(4)  | 0.021(4)  | 0.002(3)  | -0.005(3)    | 0.006(3)   |
| C(37) | 0.036(5)  | 0.033(5)  | 0.028(4)  | 0.006(4)  | 0.008(4)     | 0.006(4)   |
| C(38) | 0.039(5)  | 0.023(5)  | 0.037(5)  | 0.009(4)  | -0.005(4)    | 0.003(4)   |
| C(39) | 0.022(4)  | 0.030(5)  | 0.035(5)  | 0.000(4)  | 0.000(3)     | 0.000(3)   |
| C(40) | 0.021(4)  | 0.016(4)  | 0.027(4)  | -0.001(3) | 0.001(3)     | 0.002(3)   |
| C(41) | 0.030(4)  | 0.037(5)  | 0.023(4)  | -0.001(4) | -0.004(3)    | 0.005(4)   |
| C(42) | 0.042(5)  | 0.035(5)  | 0.030(5)  | -0.013(4) | 0.005(4)     | 0.010(4)   |
| C(43) | 0.047(6)  | 0.030(5)  | 0.044(5)  | -0.002(4) | 0.018(4)     | 0.019(4)   |
| C(44) | 0.034(5)  | 0.045(6)  | 0.029(5)  | 0.011(4)  | -0.001(4)    | 0.009(4)   |
| C(45) | 0.021(4)  | 0.027(4)  | 0.019(4)  | 0.009(3)  | 0.005(3)     | 0.004(3)   |
| I(5)  | 0.0345(3) | 0.0346(3) | 0.0236(2) | 0.0030(2) | -0.0040(2)   | -0.0021(2) |

Table S26. Atomic coordinates and equivalent isotropic displacement parameters [ $\text{\AA}^2$ ] for syn-m-1-TDACl

|        | x           | y          | z           | U(eq)       | S.O.F.    |
|--------|-------------|------------|-------------|-------------|-----------|
| I(3)   | 0.56824(3)  | 0.64127(3) | 0.33980(2)  | 0.06596(15) | 1         |
| F(00A) | 0.4671(3)   | 0.6625(2)  | 0.47127(13) | 0.0672(11)  | 1         |
| F(00C) | 0.3861(3)   | 0.8772(2)  | 0.43224(16) | 0.0806(13)  | 1         |
| F(00M) | 0.3516(3)   | 0.7623(3)  | 0.47166(16) | 0.0866(15)  | 1         |
| F(008) | 0.6531(2)   | 0.7930(2)  | 0.39219(13) | 0.0624(10)  | 1         |
| F(13)  | 0.6970(3)   | 0.5287(2)  | 0.36824(15) | 0.0830(14)  | 1         |
| F(14)  | 0.7748(3)   | 0.5016(2)  | 0.43976(17) | 0.0812(13)  | 1         |
| F(15)  | 0.7592(3)   | 0.5857(2)  | 0.50543(14) | 0.0796(13)  | 1         |
| F(16)  | 0.6588(3)   | 0.6936(2)  | 0.49948(12) | 0.0692(11)  | 1         |
| F(17A) | 0.5208(9)   | 0.9474(7)  | 0.4674(4)   | 0.065(3)    | 0.472(13) |
| F(18A) | 0.5683(8)   | 1.0698(6)  | 0.4433(5)   | 0.079(4)    | 0.472(13) |
| F(19A) | 0.6018(8)   | 1.0940(6)  | 0.3617(5)   | 0.092(4)    | 0.472(13) |
| F(20A) | 0.5890(8)   | 0.9972(8)  | 0.3060(5)   | 0.088(5)    | 0.472(13) |
| C(40A) | 0.5350(15)  | 0.9075(14) | 0.3986(6)   | 0.050(5)    | 0.472(13) |
| C(41A) | 0.5365(17)  | 0.9596(13) | 0.4275(8)   | 0.047(5)    | 0.472(13) |
| C(42A) | 0.5607(10)  | 1.0216(10) | 0.4153(7)   | 0.063(4)    | 0.472(13) |
| C(43A) | 0.576(2)    | 1.0337(16) | 0.3746(13)  | 0.070(6)    | 0.472(13) |
| C(44A) | 0.5736(16)  | 0.9833(17) | 0.3450(9)   | 0.075(5)    | 0.472(13) |
| C(45A) | 0.5509(14)  | 0.9211(13) | 0.3573(7)   | 0.055(4)    | 0.472(13) |
| I(4A)  | 0.53819(19) | 0.8449(4)  | 0.31131(9)  | 0.0652(9)   | 0.472(13) |
| F(17B) | 0.5438(10)  | 0.9597(6)  | 0.4469(6)   | 0.072(4)    | 0.528(13) |
| F(18B) | 0.5809(7)   | 1.0740(5)  | 0.4082(7)   | 0.113(7)    | 0.528(13) |
| F(19B) | 0.5993(8)   | 1.0769(6)  | 0.3235(7)   | 0.128(7)    | 0.528(13) |
| F(20B) | 0.5793(8)   | 0.9649(8)  | 0.2788(5)   | 0.106(5)    | 0.528(13) |
| C(40B) | 0.5434(15)  | 0.8989(11) | 0.3833(9)   | 0.060(5)    | 0.528(13) |
| C(41B) | 0.5500(12)  | 0.9583(10) | 0.4060(9)   | 0.065(5)    | 0.528(13) |
| C(42B) | 0.572(2)    | 1.0180(13) | 0.3857(13)  | 0.079(7)    | 0.528(13) |
| C(43B) | 0.5775(13)  | 1.0180(12) | 0.3455(11)  | 0.077(6)    | 0.528(13) |
| C(44B) | 0.5702(13)  | 0.9617(11) | 0.3202(10)  | 0.081(5)    | 0.528(13) |
| C(45B) | 0.5544(12)  | 0.9024(8)  | 0.3417(7)   | 0.055(4)    | 0.528(13) |
| I(4B)  | 0.53631(14) | 0.8176(3)  | 0.30270(15) | 0.0633(8)   | 0.528(13) |
| C(28)  | 0.6323(4)   | 0.6248(4)  | 0.39612(18) | 0.0493(15)  | 1         |
| C(29)  | 0.6858(5)   | 0.5708(4)  | 0.4001(2)   | 0.0580(18)  | 1         |
| C(30)  | 0.7278(5)   | 0.5572(4)  | 0.4367(2)   | 0.0591(18)  | 1         |
| C(31)  | 0.7195(5)   | 0.5993(4)  | 0.4696(2)   | 0.0573(17)  | 1         |
| C(32)  | 0.6672(4)   | 0.6541(3)  | 0.4659(2)   | 0.0519(16)  | 1         |
| C(33)  | 0.6223(4)   | 0.6685(3)  | 0.43035(18) | 0.0455(14)  | 1         |
| C(34)  | 0.5620(4)   | 0.7249(3)  | 0.43003(17) | 0.0418(13)  | 1         |
| C(35)  | 0.4846(4)   | 0.7195(3)  | 0.45092(18) | 0.0496(15)  | 1         |
| C(36)  | 0.4258(5)   | 0.7692(4)  | 0.4514(2)   | 0.0590(17)  | 1         |
| C(37)  | 0.4443(4)   | 0.8281(4)  | 0.4318(2)   | 0.0588(18)  | 1         |
| C(38)  | 0.5205(4)   | 0.8379(3)  | 0.4109(2)   | 0.0558(17)  | 1         |
| C(39)  | 0.5774(4)   | 0.7851(3)  | 0.4113(2)   | 0.0491(15)  | 1         |
| I(1)   | 0.44924(3)  | 0.22400(3) | 0.31990(2)  | 0.06722(16) | 1         |
| I(2)   | 0.45077(3)  | 0.42440(3) | 0.32111(2)  | 0.06846(16) | 1         |

|       |           |            |             |            |          |
|-------|-----------|------------|-------------|------------|----------|
| F(1)  | 0.3665(3) | 0.0801(3)  | 0.33215(16) | 0.0904(16) | 1        |
| F(2)  | 0.3259(3) | 0.0091(2)  | 0.39981(19) | 0.0889(16) | 1        |
| F(3)  | 0.3544(4) | 0.0586(3)  | 0.47640(18) | 0.0953(16) | 1        |
| F(4)  | 0.4299(3) | 0.1782(2)  | 0.48549(12) | 0.0782(13) | 1        |
| F(5)  | 0.3561(2) | 0.3202(2)  | 0.40624(11) | 0.0567(9)  | 1        |
| F(6)  | 0.6099(3) | 0.2048(2)  | 0.43367(15) | 0.0754(12) | 1        |
| F(7)  | 0.6933(3) | 0.3209(3)  | 0.44244(17) | 0.0810(13) | 1        |
| F(8)  | 0.6087(3) | 0.4372(2)  | 0.43194(15) | 0.0787(13) | 1        |
| F(9)  | 0.4284(3) | 0.4554(2)  | 0.48775(12) | 0.0735(12) | 1        |
| F(10) | 0.3441(3) | 0.5715(3)  | 0.48307(17) | 0.0891(15) | 1        |
| F(11) | 0.3156(3) | 0.6290(3)  | 0.4078(2)   | 0.0946(16) | 1        |
| F(12) | 0.3571(3) | 0.5635(3)  | 0.33759(16) | 0.0886(15) | 1        |
| C(10) | 0.4190(4) | 0.1691(4)  | 0.3732(2)   | 0.0553(17) | 1        |
| C(11) | 0.3821(5) | 0.1064(4)  | 0.3703(3)   | 0.065(2)   | 1        |
| C(12) | 0.3616(5) | 0.0695(4)  | 0.4040(3)   | 0.068(2)   | 1        |
| C(13) | 0.3759(5) | 0.0940(4)  | 0.4432(3)   | 0.068(2)   | 1        |
| C(14) | 0.4137(5) | 0.1566(4)  | 0.4467(2)   | 0.0598(18) | 1        |
| C(15) | 0.4363(4) | 0.1942(4)  | 0.4133(2)   | 0.0518(16) | 1        |
| C(16) | 0.4802(4) | 0.2592(4)  | 0.41964(17) | 0.0491(15) | 1        |
| C(17) | 0.5663(4) | 0.2619(4)  | 0.4293(2)   | 0.0556(17) | 1        |
| C(18) | 0.6094(4) | 0.3210(4)  | 0.4338(2)   | 0.0588(18) | 1        |
| C(19) | 0.5663(4) | 0.3792(4)  | 0.42847(19) | 0.0564(17) | 1        |
| C(20) | 0.4792(4) | 0.3815(3)  | 0.41922(17) | 0.0483(15) | 1        |
| C(21) | 0.4400(4) | 0.3201(4)  | 0.41531(17) | 0.0499(16) | 1        |
| C(22) | 0.4349(4) | 0.4463(4)  | 0.4147(2)   | 0.0557(17) | 1        |
| C(23) | 0.4108(5) | 0.4806(4)  | 0.4499(2)   | 0.0610(18) | 1        |
| C(24) | 0.3699(5) | 0.5416(4)  | 0.4483(3)   | 0.072(2)   | 1        |
| C(25) | 0.3532(5) | 0.5693(5)  | 0.4103(3)   | 0.075(2)   | 1        |
| C(26) | 0.3766(5) | 0.5363(5)  | 0.3749(3)   | 0.069(2)   | 1        |
| C(27) | 0.4167(4) | 0.4747(4)  | 0.3761(2)   | 0.0596(19) | 1        |
| N(1A) | 0.7457(5) | 1.2095(4)  | 0.2667(2)   | 0.0670(12) | 0.813(4) |
| N(2A) | 0.7225(5) | 1.3876(4)  | 0.2856(2)   | 0.0670(12) | 0.813(4) |
| N(3A) | 0.7897(5) | 1.3232(4)  | 0.1816(2)   | 0.0670(12) | 0.813(4) |
| C(1A) | 0.7493(5) | 1.2708(4)  | 0.2524(3)   | 0.0454(11) | 0.813(4) |
| C(2A) | 0.7403(5) | 1.3375(5)  | 0.2591(3)   | 0.0454(11) | 0.813(4) |
| C(3A) | 0.7667(5) | 1.3141(5)  | 0.2209(3)   | 0.0454(11) | 0.813(4) |
| C(4A) | 0.7010(8) | 1.3736(6)  | 0.3280(3)   | 0.0773(12) | 0.813(4) |
| C(5A) | 0.7120(7) | 1.4545(5)  | 0.2714(3)   | 0.0773(12) | 0.813(4) |
| C(6A) | 0.8002(8) | 1.3887(5)  | 0.1653(4)   | 0.0773(12) | 0.813(4) |
| C(7A) | 0.8081(7) | 1.2681(5)  | 0.1551(3)   | 0.0773(12) | 0.813(4) |
| C(8A) | 0.7696(8) | 1.1535(5)  | 0.2421(4)   | 0.0773(12) | 0.813(4) |
| C(9A) | 0.7067(7) | 1.1952(6)  | 0.3058(3)   | 0.0773(12) | 0.813(4) |
| N(1B) | 0.719(2)  | 1.2983(15) | 0.3115(10)  | 0.0670(12) | 0.187(4) |
| N(2B) | 0.770(2)  | 1.4024(16) | 0.2193(9)   | 0.0670(12) | 0.187(4) |
| N(3B) | 0.776(2)  | 1.2201(17) | 0.2147(9)   | 0.0670(12) | 0.187(4) |
| C(1B) | 0.738(2)  | 1.303(2)   | 0.2682(12)  | 0.0454(11) | 0.187(4) |
| C(2B) | 0.759(2)  | 1.348(2)   | 0.2389(13)  | 0.0454(11) | 0.187(4) |

|        |          |            |            |            |          |
|--------|----------|------------|------------|------------|----------|
| C(3B)  | 0.765(2) | 1.279(2)   | 0.2346(13) | 0.0454(11) | 0.187(4) |
| C(4B)  | 0.754(3) | 1.4623(19) | 0.2417(14) | 0.0773(12) | 0.187(4) |
| C(5B)  | 0.807(3) | 1.411(3)   | 0.1790(11) | 0.0773(12) | 0.187(4) |
| C(6B)  | 0.806(3) | 1.223(3)   | 0.1727(10) | 0.0773(12) | 0.187(4) |
| C(7B)  | 0.795(3) | 1.156(2)   | 0.2307(16) | 0.0773(12) | 0.187(4) |
| C(8B)  | 0.705(3) | 1.2332(18) | 0.3279(15) | 0.0773(12) | 0.187(4) |
| C(9B)  | 0.679(3) | 1.352(2)   | 0.3328(16) | 0.0773(12) | 0.187(4) |
| Cl(1)  | 0.5      | 0.7006(3)  | 0.25       | 0.1128(15) | 1        |
| Cl(2)  | 0.5      | 0.3255(2)  | 0.25       | 0.1065(13) | 1        |
| H(4A1) | 0.690232 | 1.414658   | 0.34245    | 0.116      | 0.407(2) |
| H(4A2) | 0.650858 | 1.346186   | 0.328977   | 0.116      | 0.407(2) |
| H(4A3) | 0.747545 | 1.350683   | 0.34114    | 0.116      | 0.407(2) |
| H(4A4) | 0.702191 | 1.32636    | 0.332595   | 0.116      | 0.407(2) |
| H(4A5) | 0.741565 | 1.394832   | 0.346068   | 0.116      | 0.407(2) |
| H(4A6) | 0.644878 | 1.390335   | 0.333905   | 0.116      | 0.407(2) |
| H(5A1) | 0.699657 | 1.482889   | 0.294715   | 0.116      | 0.407(2) |
| H(5A2) | 0.763594 | 1.469229   | 0.258224   | 0.116      | 0.407(2) |
| H(5A3) | 0.665754 | 1.456514   | 0.251927   | 0.116      | 0.407(2) |
| H(5A4) | 0.719679 | 1.456199   | 0.241863   | 0.116      | 0.407(2) |
| H(5A5) | 0.655743 | 1.469859   | 0.278353   | 0.116      | 0.407(2) |
| H(5A6) | 0.753582 | 1.482574   | 0.28465    | 0.116      | 0.407(2) |
| H(6A1) | 0.81688  | 1.385929   | 0.13659    | 0.116      | 0.407(2) |
| H(6A2) | 0.747344 | 1.412565   | 0.167423   | 0.116      | 0.407(2) |
| H(6A3) | 0.843566 | 1.41167    | 0.18072    | 0.116      | 0.407(2) |
| H(6A4) | 0.788314 | 1.420847   | 0.186565   | 0.116      | 0.407(2) |
| H(6A5) | 0.857849 | 1.394211   | 0.155732   | 0.116      | 0.407(2) |
| H(6A6) | 0.761628 | 1.395105   | 0.142436   | 0.116      | 0.407(2) |
| H(7A1) | 0.82353  | 1.284275   | 0.128008   | 0.116      | 0.407(2) |
| H(7A2) | 0.854648 | 1.242927   | 0.166466   | 0.116      | 0.407(2) |
| H(7A3) | 0.758659 | 1.240165   | 0.152874   | 0.116      | 0.407(2) |
| H(7A4) | 0.801028 | 1.227303   | 0.170224   | 0.116      | 0.407(2) |
| H(7A5) | 0.76991  | 1.268651   | 0.131765   | 0.116      | 0.407(2) |
| H(7A6) | 0.865899 | 1.271413   | 0.145358   | 0.116      | 0.407(2) |
| H(8A1) | 0.762543 | 1.113436   | 0.257979   | 0.116      | 0.407(2) |
| H(8A2) | 0.734134 | 1.151544   | 0.217761   | 0.116      | 0.407(2) |
| H(8A3) | 0.828221 | 1.157834   | 0.233827   | 0.116      | 0.407(2) |
| H(8A4) | 0.787389 | 1.168441   | 0.215065   | 0.116      | 0.407(2) |
| H(8A5) | 0.815798 | 1.130332   | 0.255284   | 0.116      | 0.407(2) |
| H(8A6) | 0.721711 | 1.124042   | 0.239217   | 0.116      | 0.407(2) |
| H(9A1) | 0.710023 | 1.148179   | 0.311116   | 0.116      | 0.407(2) |
| H(9A2) | 0.735969 | 1.218957   | 0.327385   | 0.116      | 0.407(2) |
| H(9A3) | 0.648012 | 1.208693   | 0.305083   | 0.116      | 0.407(2) |
| H(9A4) | 0.685979 | 1.235707   | 0.31794    | 0.116      | 0.407(2) |
| H(9A5) | 0.660034 | 1.164929   | 0.301671   | 0.116      | 0.407(2) |
| H(9A6) | 0.74799  | 1.175193   | 0.323972   | 0.116      | 0.407(2) |
| H(4B1) | 0.764763 | 1.499917   | 0.224013   | 0.116      | 0.093(2) |
| H(4B2) | 0.695621 | 1.462988   | 0.250639   | 0.116      | 0.093(2) |

|        |          |          |          |       |          |
|--------|----------|----------|----------|-------|----------|
| H(4B3) | 0.790858 | 1.464405 | 0.265508 | 0.116 | 0.093(2) |
| H(4B4) | 0.736065 | 1.451623 | 0.269427 | 0.116 | 0.093(2) |
| H(4B5) | 0.805207 | 1.488552 | 0.2428   | 0.116 | 0.093(2) |
| H(4B6) | 0.70997  | 1.487136 | 0.227932 | 0.116 | 0.093(2) |
| H(5B1) | 0.807796 | 1.457551 | 0.172062 | 0.116 | 0.093(2) |
| H(5B2) | 0.864432 | 1.394165 | 0.179077 | 0.116 | 0.093(2) |
| H(5B3) | 0.773888 | 1.387201 | 0.158831 | 0.116 | 0.093(2) |
| H(5B4) | 0.822948 | 1.368394 | 0.167918 | 0.116 | 0.093(2) |
| H(5B5) | 0.766312 | 1.43178  | 0.160904 | 0.116 | 0.093(2) |
| H(5B6) | 0.856856 | 1.438744 | 0.181149 | 0.116 | 0.093(2) |
| H(6B1) | 0.810753 | 1.179226 | 0.161639 | 0.116 | 0.093(2) |
| H(6B2) | 0.765945 | 1.248508 | 0.156209 | 0.116 | 0.093(2) |
| H(6B3) | 0.860403 | 1.244929 | 0.172081 | 0.116 | 0.093(2) |
| H(6B4) | 0.813981 | 1.269216 | 0.16498  | 0.116 | 0.093(2) |
| H(6B5) | 0.858789 | 1.199934 | 0.17041  | 0.116 | 0.093(2) |
| H(6B6) | 0.764331 | 1.203513 | 0.154538 | 0.116 | 0.093(2) |
| H(7B1) | 0.797772 | 1.124232 | 0.208205 | 0.116 | 0.093(2) |
| H(7B2) | 0.848377 | 1.156729 | 0.245022 | 0.116 | 0.093(2) |
| H(7B3) | 0.75056  | 1.142212 | 0.249673 | 0.116 | 0.093(2) |
| H(7B4) | 0.800034 | 1.157883 | 0.260395 | 0.116 | 0.093(2) |
| H(7B5) | 0.749429 | 1.125386 | 0.223578 | 0.116 | 0.093(2) |
| H(7B6) | 0.847246 | 1.139903 | 0.218927 | 0.116 | 0.093(2) |
| H(8B1) | 0.73467  | 1.201204 | 0.31104  | 0.116 | 0.093(2) |
| H(8B2) | 0.726141 | 1.231205 | 0.355836 | 0.116 | 0.093(2) |
| H(8B3) | 0.645081 | 1.223403 | 0.327706 | 0.116 | 0.093(2) |
| H(8B4) | 0.669258 | 1.236004 | 0.352015 | 0.116 | 0.093(2) |
| H(8B5) | 0.677787 | 1.206003 | 0.307218 | 0.116 | 0.093(2) |
| H(8B6) | 0.758847 | 1.213805 | 0.335349 | 0.116 | 0.093(2) |
| H(9B1) | 0.692563 | 1.392769 | 0.319153 | 0.116 | 0.093(2) |
| H(9B2) | 0.61838  | 1.345176 | 0.332818 | 0.116 | 0.093(2) |
| H(9B3) | 0.69944  | 1.352979 | 0.360949 | 0.116 | 0.093(2) |
| H(9B4) | 0.647693 | 1.334514 | 0.356127 | 0.116 | 0.093(2) |
| H(9B5) | 0.721875 | 1.382106 | 0.342462 | 0.116 | 0.093(2) |
| H(9B6) | 0.640815 | 1.374304 | 0.314332 | 0.116 | 0.093(2) |

Table S27. Anisotropic displacement parameters [Å<sup>2</sup>] for syn-m-1-TDACI

|        | U11       | U22        | U33        | U23         | U13          | U12         |
|--------|-----------|------------|------------|-------------|--------------|-------------|
| I(3)   | 0.0621(3) | 0.1026(4)  | 0.0333(2)  | -0.0150(2)  | 0.00260(18)  | -0.0074(3)  |
| F(00A) | 0.071(3)  | 0.077(3)   | 0.053(2)   | 0.007(2)    | 0.021(2)     | -0.015(2)   |
| F(00C) | 0.066(3)  | 0.079(3)   | 0.097(4)   | -0.010(3)   | -0.001(2)    | 0.020(2)    |
| F(00M) | 0.067(3)  | 0.112(4)   | 0.081(3)   | 0.001(3)    | 0.034(2)     | 0.011(3)    |
| F(008) | 0.040(2)  | 0.070(3)   | 0.077(3)   | 0.019(2)    | 0.0009(18)   | -0.0065(18) |
| F(13)  | 0.094(3)  | 0.082(3)   | 0.073(3)   | -0.028(2)   | 0.019(3)     | 0.012(3)    |
| F(14)  | 0.067(3)  | 0.068(3)   | 0.109(4)   | 0.006(3)    | 0.014(3)     | 0.015(2)    |
| F(15)  | 0.084(3)  | 0.087(3)   | 0.068(3)   | 0.017(2)    | -0.024(2)    | 0.004(3)    |
| F(16)  | 0.091(3)  | 0.078(3)   | 0.0386(19) | -0.0134(19) | -0.013(2)    | 0.005(2)    |
| F(17A) | 0.084(8)  | 0.072(7)   | 0.041(6)   | -0.009(5)   | 0.011(5)     | 0.004(6)    |
| F(18A) | 0.070(7)  | 0.062(6)   | 0.105(9)   | -0.013(7)   | -0.005(7)    | 0.007(5)    |
| F(19A) | 0.078(7)  | 0.075(7)   | 0.123(12)  | 0.044(8)    | 0.030(7)     | 0.011(6)    |
| F(20A) | 0.083(8)  | 0.097(10)  | 0.085(10)  | 0.045(9)    | 0.028(7)     | 0.013(7)    |
| C(40A) | 0.040(9)  | 0.064(10)  | 0.046(8)   | -0.014(7)   | -0.012(7)    | 0.020(7)    |
| C(41A) | 0.042(10) | 0.059(8)   | 0.040(11)  | -0.006(8)   | -0.016(10)   | 0.010(6)    |
| C(42A) | 0.040(8)  | 0.066(9)   | 0.083(10)  | 0.004(8)    | -0.002(8)    | 0.008(6)    |
| C(43A) | 0.053(13) | 0.064(12)  | 0.092(13)  | 0.018(9)    | 0.010(10)    | 0.011(11)   |
| C(44A) | 0.054(11) | 0.078(12)  | 0.093(12)  | 0.006(10)   | 0.010(10)    | 0.014(11)   |
| C(45A) | 0.046(9)  | 0.069(10)  | 0.051(9)   | -0.017(8)   | 0.005(8)     | 0.017(8)    |
| I(4A)  | 0.0544(7) | 0.106(3)   | 0.0350(8)  | -0.0015(11) | 0.0065(6)    | 0.0148(11)  |
| F(17B) | 0.073(8)  | 0.058(6)   | 0.084(14)  | -0.017(9)   | -0.009(10)   | 0.001(5)    |
| F(18B) | 0.066(7)  | 0.038(5)   | 0.23(2)    | -0.013(9)   | -0.040(10)   | 0.006(5)    |
| F(19B) | 0.090(8)  | 0.085(8)   | 0.208(19)  | 0.085(11)   | -0.006(10)   | -0.013(6)   |
| F(20B) | 0.093(8)  | 0.130(11)  | 0.095(9)   | 0.059(9)    | 0.006(7)     | -0.015(7)   |
| C(40B) | 0.052(10) | 0.047(8)   | 0.082(12)  | -0.001(8)   | -0.002(10)   | -0.014(7)   |
| C(41B) | 0.048(9)  | 0.054(9)   | 0.092(13)  | -0.012(9)   | -0.010(10)   | 0.003(7)    |
| C(42B) | 0.048(12) | 0.052(9)   | 0.136(18)  | 0.008(10)   | -0.026(13)   | 0.005(8)    |
| C(43B) | 0.042(9)  | 0.050(9)   | 0.138(17)  | 0.022(10)   | -0.012(10)   | 0.003(8)    |
| C(44B) | 0.067(11) | 0.065(9)   | 0.112(14)  | 0.025(9)    | -0.007(11)   | -0.011(8)   |
| C(45B) | 0.040(8)  | 0.042(8)   | 0.084(11)  | 0.000(7)    | -0.002(8)    | 0.004(6)    |
| I(4B)  | 0.0511(6) | 0.0933(19) | 0.0455(11) | 0.0100(11)  | 0.0103(6)    | -0.0047(8)  |
| C(28)  | 0.048(4)  | 0.068(4)   | 0.032(3)   | -0.007(3)   | 0.007(2)     | -0.011(3)   |
| C(29)  | 0.061(4)  | 0.062(4)   | 0.051(4)   | -0.015(3)   | 0.020(3)     | -0.002(3)   |
| C(30)  | 0.050(4)  | 0.059(4)   | 0.068(5)   | 0.007(4)    | 0.007(3)     | -0.002(3)   |
| C(31)  | 0.057(4)  | 0.063(4)   | 0.052(4)   | 0.009(3)    | 0.002(3)     | -0.007(3)   |
| C(32)  | 0.058(4)  | 0.055(4)   | 0.042(3)   | -0.003(3)   | 0.003(3)     | -0.006(3)   |
| C(33)  | 0.051(4)  | 0.052(4)   | 0.033(3)   | 0.000(2)    | 0.007(2)     | -0.007(3)   |
| C(34)  | 0.047(3)  | 0.048(3)   | 0.030(3)   | -0.005(2)   | -0.002(2)    | -0.005(3)   |
| C(35)  | 0.063(4)  | 0.053(4)   | 0.033(3)   | -0.004(3)   | 0.006(3)     | -0.007(3)   |
| C(36)  | 0.055(4)  | 0.073(5)   | 0.049(4)   | -0.011(3)   | 0.010(3)     | 0.002(4)    |
| C(37)  | 0.050(4)  | 0.067(5)   | 0.060(4)   | -0.013(3)   | -0.009(3)    | 0.009(3)    |
| C(38)  | 0.052(4)  | 0.049(4)   | 0.066(4)   | -0.006(3)   | -0.013(3)    | -0.009(3)   |
| C(39)  | 0.043(3)  | 0.057(4)   | 0.048(3)   | 0.001(3)    | -0.005(3)    | -0.009(3)   |
| I(1)   | 0.0543(3) | 0.1123(4)  | 0.0350(2)  | -0.0181(2)  | -0.00921(17) | 0.0107(3)   |
| I(2)   | 0.0520(3) | 0.1199(4)  | 0.0335(2)  | 0.0185(2)   | -0.00636(17) | -0.0057(3)  |
| F(1)   | 0.093(3)  | 0.100(4)   | 0.079(3)   | -0.044(3)   | -0.041(3)    | 0.013(3)    |
| F(2)   | 0.073(3)  | 0.067(3)   | 0.127(4)   | -0.025(3)   | -0.028(3)    | -0.004(2)   |
| F(3)   | 0.115(4)  | 0.076(3)   | 0.094(4)   | 0.004(3)    | 0.003(3)     | -0.032(3)   |
| F(4)   | 0.120(4)  | 0.074(3)   | 0.041(2)   | -0.0050(19) | -0.001(2)    | -0.029(3)   |
| F(5)   | 0.052(2)  | 0.068(2)   | 0.050(2)   | 0.0017(18)  | -0.0108(17)  | -0.0111(18) |
| F(6)   | 0.060(3)  | 0.083(3)   | 0.084(3)   | -0.017(2)   | -0.011(2)    | 0.004(2)    |
| F(7)   | 0.048(2)  | 0.098(3)   | 0.098(4)   | -0.009(3)   | -0.007(2)    | -0.013(2)   |
| F(8)   | 0.072(3)  | 0.084(3)   | 0.081(3)   | 0.009(2)    | -0.007(2)    | -0.034(2)   |
| F(9)   | 0.110(4)  | 0.070(3)   | 0.040(2)   | 0.0063(18)  | 0.009(2)     | -0.025(3)   |
| F(10)  | 0.099(4)  | 0.081(3)   | 0.088(3)   | -0.008(3)   | 0.031(3)     | -0.017(3)   |
| F(11)  | 0.071(3)  | 0.086(4)   | 0.127(5)   | 0.014(3)    | -0.003(3)    | 0.005(3)    |

|       |          |          |            |           |             |           |
|-------|----------|----------|------------|-----------|-------------|-----------|
| F(12) | 0.071(3) | 0.113(4) | 0.082(3)   | 0.038(3)  | -0.024(2)   | 0.003(3)  |
| C(10) | 0.043(4) | 0.077(5) | 0.046(3)   | -0.018(3) | -0.009(3)   | 0.007(3)  |
| C(11) | 0.050(4) | 0.078(5) | 0.068(5)   | -0.030(4) | -0.022(3)   | 0.014(4)  |
| C(12) | 0.054(4) | 0.053(4) | 0.097(6)   | -0.023(4) | -0.019(4)   | 0.005(3)  |
| C(13) | 0.063(5) | 0.062(5) | 0.078(5)   | -0.007(4) | -0.004(4)   | -0.007(4) |
| C(14) | 0.068(5) | 0.060(4) | 0.051(4)   | -0.011(3) | -0.005(3)   | -0.007(4) |
| C(15) | 0.048(4) | 0.066(4) | 0.041(3)   | -0.012(3) | -0.005(3)   | -0.001(3) |
| C(16) | 0.050(4) | 0.069(4) | 0.028(3)   | -0.004(3) | -0.002(2)   | -0.007(3) |
| C(17) | 0.056(4) | 0.072(5) | 0.039(3)   | -0.008(3) | -0.001(3)   | -0.004(4) |
| C(18) | 0.041(4) | 0.087(5) | 0.048(4)   | -0.005(4) | 0.000(3)    | -0.013(4) |
| C(19) | 0.055(4) | 0.078(5) | 0.036(3)   | 0.003(3)  | 0.001(3)    | -0.021(4) |
| C(20) | 0.054(4) | 0.066(4) | 0.025(3)   | 0.006(3)  | -0.003(2)   | -0.016(3) |
| C(21) | 0.047(4) | 0.076(5) | 0.027(3)   | 0.003(3)  | -0.004(2)   | -0.013(3) |
| C(22) | 0.054(4) | 0.072(5) | 0.041(3)   | 0.010(3)  | 0.002(3)    | -0.020(3) |
| C(23) | 0.074(5) | 0.059(4) | 0.050(4)   | 0.007(3)  | 0.007(3)    | -0.022(4) |
| C(24) | 0.068(5) | 0.078(6) | 0.071(5)   | 0.008(4)  | 0.014(4)    | -0.023(4) |
| C(25) | 0.052(4) | 0.079(6) | 0.094(7)   | 0.006(5)  | 0.000(4)    | -0.005(4) |
| C(26) | 0.052(4) | 0.089(6) | 0.066(5)   | 0.021(4)  | -0.006(4)   | -0.011(4) |
| C(27) | 0.047(4) | 0.092(6) | 0.040(3)   | 0.012(3)  | -0.001(3)   | -0.016(4) |
| N(1A) | 0.063(3) | 0.078(3) | 0.060(3)   | 0.004(2)  | 0.003(2)    | 0.003(2)  |
| N(2A) | 0.063(3) | 0.078(3) | 0.060(3)   | 0.004(2)  | 0.003(2)    | 0.003(2)  |
| N(3A) | 0.063(3) | 0.078(3) | 0.060(3)   | 0.004(2)  | 0.003(2)    | 0.003(2)  |
| C(1A) | 0.040(2) | 0.053(3) | 0.043(3)   | 0.001(3)  | 0.0002(19)  | -0.005(2) |
| C(2A) | 0.040(2) | 0.053(3) | 0.043(3)   | 0.001(3)  | 0.0002(19)  | -0.005(2) |
| C(3A) | 0.040(2) | 0.053(3) | 0.043(3)   | 0.001(3)  | 0.0002(19)  | -0.005(2) |
| C(4A) | 0.074(3) | 0.086(3) | 0.072(3)   | 0.000(2)  | -0.001(2)   | 0.005(2)  |
| C(5A) | 0.074(3) | 0.086(3) | 0.072(3)   | 0.000(2)  | -0.001(2)   | 0.005(2)  |
| C(6A) | 0.074(3) | 0.086(3) | 0.072(3)   | 0.000(2)  | -0.001(2)   | 0.005(2)  |
| C(7A) | 0.074(3) | 0.086(3) | 0.072(3)   | 0.000(2)  | -0.001(2)   | 0.005(2)  |
| C(8A) | 0.074(3) | 0.086(3) | 0.072(3)   | 0.000(2)  | -0.001(2)   | 0.005(2)  |
| C(9A) | 0.074(3) | 0.086(3) | 0.072(3)   | 0.000(2)  | -0.001(2)   | 0.005(2)  |
| N(1B) | 0.063(3) | 0.078(3) | 0.060(3)   | 0.004(2)  | 0.003(2)    | 0.003(2)  |
| N(2B) | 0.063(3) | 0.078(3) | 0.060(3)   | 0.004(2)  | 0.003(2)    | 0.003(2)  |
| N(3B) | 0.063(3) | 0.078(3) | 0.060(3)   | 0.004(2)  | 0.003(2)    | 0.003(2)  |
| C(1B) | 0.040(2) | 0.053(3) | 0.043(3)   | 0.001(3)  | 0.0002(19)  | -0.005(2) |
| C(2B) | 0.040(2) | 0.053(3) | 0.043(3)   | 0.001(3)  | 0.0002(19)  | -0.005(2) |
| C(3B) | 0.040(2) | 0.053(3) | 0.043(3)   | 0.001(3)  | 0.0002(19)  | -0.005(2) |
| C(4B) | 0.074(3) | 0.086(3) | 0.072(3)   | 0.000(2)  | -0.001(2)   | 0.005(2)  |
| C(5B) | 0.074(3) | 0.086(3) | 0.072(3)   | 0.000(2)  | -0.001(2)   | 0.005(2)  |
| C(6B) | 0.074(3) | 0.086(3) | 0.072(3)   | 0.000(2)  | -0.001(2)   | 0.005(2)  |
| C(7B) | 0.074(3) | 0.086(3) | 0.072(3)   | 0.000(2)  | -0.001(2)   | 0.005(2)  |
| C(8B) | 0.074(3) | 0.086(3) | 0.072(3)   | 0.000(2)  | -0.001(2)   | 0.005(2)  |
| C(9B) | 0.074(3) | 0.086(3) | 0.072(3)   | 0.000(2)  | -0.001(2)   | 0.005(2)  |
| Cl(1) | 0.082(2) | 0.213(5) | 0.0435(14) | 0         | -0.0109(14) | 0         |
| Cl(2) | 0.104(2) | 0.191(4) | 0.0251(11) | 0         | 0.0127(13)  | 0         |

Table S28. Atomic coordinates and equivalent isotropic displacement parameters [Å<sup>2</sup>] for anti-m-1-TDAI

|       | x           | y            | z          | U(eq)       |
|-------|-------------|--------------|------------|-------------|
| I(1)  | 0.72214(5)  | -0.04639(10) | 0.65623(2) | 0.04135(17) |
| I(2)  | 0.81934(4)  | 0.17716(7)   | 0.27687(2) | 0.03442(16) |
| I(3)  | 0.55376(5)  | 0.07403(8)   | 0.54730(3) | 0.03872(16) |
| F(1)  | 1.0060(6)   | 0.4348(9)    | 0.3094(2)  | 0.0461(15)  |
| F(2)  | 1.0715(6)   | 0.5979(8)    | 0.3969(3)  | 0.0481(15)  |
| F(3)  | 0.9756(6)   | 0.5429(9)    | 0.4816(3)  | 0.0511(16)  |
| F(4)  | 0.8167(5)   | 0.3167(8)    | 0.4796(2)  | 0.0434(14)  |
| F(5)  | 0.6222(5)   | 0.3472(7)    | 0.4137(3)  | 0.0420(13)  |
| F(6)  | 0.8437(5)   | -0.1079(7)   | 0.3785(2)  | 0.0396(12)  |
| F(7)  | 0.6910(6)   | -0.3271(7)   | 0.3964(3)  | 0.0554(18)  |
| F(8)  | 0.5043(6)   | -0.2146(8)   | 0.4243(3)  | 0.0509(16)  |
| F(9)  | 0.3201(6)   | 0.2171(11)   | 0.5461(3)  | 0.0566(17)  |
| F(10) | 0.1713(6)   | 0.3252(11)   | 0.4717(3)  | 0.0605(19)  |
| F(11) | 0.2056(6)   | 0.3043(10)   | 0.3724(3)  | 0.0564(17)  |
| F(12) | 0.3931(6)   | 0.1844(9)    | 0.3482(2)  | 0.0485(15)  |
| C(1)  | 0.8745(7)   | 0.2853(12)   | 0.3486(3)  | 0.0295(18)  |
| C(2)  | 0.9570(9)   | 0.4019(12)   | 0.3507(4)  | 0.036(2)    |
| C(3)  | 0.9934(9)   | 0.4888(11)   | 0.3955(4)  | 0.037(2)    |
| C(4)  | 0.9429(9)   | 0.4599(12)   | 0.4382(4)  | 0.037(2)    |
| C(5)  | 0.8614(8)   | 0.3423(12)   | 0.4363(4)  | 0.0337(19)  |
| C(6)  | 0.8252(7)   | 0.2532(11)   | 0.3921(3)  | 0.0288(17)  |
| C(7)  | 0.7377(8)   | 0.1290(12)   | 0.3951(4)  | 0.0304(18)  |
| C(8)  | 0.7516(8)   | -0.0461(12)  | 0.3910(4)  | 0.0309(18)  |
| C(9)  | 0.6740(9)   | -0.1596(11)  | 0.3999(4)  | 0.037(2)    |
| C(10) | 0.5786(9)   | -0.1002(12)  | 0.4144(4)  | 0.037(2)    |
| C(11) | 0.5600(8)   | 0.0708(12)   | 0.4193(4)  | 0.0317(19)  |
| C(12) | 0.6393(8)   | 0.1800(11)   | 0.4090(4)  | 0.033(2)    |
| C(13) | 0.4572(7)   | 0.1383(11)   | 0.4353(4)  | 0.0296(17)  |
| C(14) | 0.4392(8)   | 0.1469(12)   | 0.4862(4)  | 0.0342(19)  |
| C(15) | 0.3418(10)  | 0.2111(14)   | 0.4975(4)  | 0.043(2)    |
| C(16) | 0.2646(9)   | 0.2646(14)   | 0.4591(5)  | 0.045(2)    |
| C(17) | 0.2820(8)   | 0.2564(13)   | 0.4093(4)  | 0.041(2)    |
| C(18) | 0.3778(9)   | 0.1918(12)   | 0.3973(4)  | 0.039(2)    |
| N(1)  | 0.6401(10)  | 0.5326(14)   | 0.5884(5)  | 0.059(3)    |
| N(2)  | 0.6805(11)  | 0.4251(13)   | 0.7247(5)  | 0.059(3)    |
| N(3)  | 0.9035(9)   | 0.3784(15)   | 0.6479(5)  | 0.055(2)    |
| C(37) | 0.6799(18)  | 0.5829(19)   | 0.5429(7)  | 0.076(5)    |
| C(38) | 0.5286(15)  | 0.567(2)     | 0.5936(9)  | 0.081(5)    |
| C(39) | 0.5794(15)  | 0.5015(17)   | 0.7310(8)  | 0.071(4)    |
| C(40) | 0.7384(15)  | 0.3350(18)   | 0.7680(6)  | 0.064(4)    |
| C(41) | 0.9740(13)  | 0.330(3)     | 0.6928(6)  | 0.076(5)    |
| C(42) | 0.9474(14)  | 0.3875(16)   | 0.5985(6)  | 0.061(3)    |
| C(43) | 0.7055(11)  | 0.4793(13)   | 0.6299(5)  | 0.051(3)    |
| C(44) | 0.7198(11)  | 0.4352(14)   | 0.6803(5)  | 0.047(3)    |
| C(45) | 0.8039(11)  | 0.4207(12)   | 0.6511(5)  | 0.045(3)    |
| I(4)  | -0.05987(5) | 0.90079(8)   | 0.59193(3) | 0.03913(17) |
| I(5)  | 0.49812(5)  | 1.00628(8)   | 0.71819(3) | 0.04133(17) |
| F(13) | -0.0664(7)  | 1.0131(10)   | 0.4782(3)  | 0.0566(18)  |
| F(14) | 0.0730(7)   | 0.9905(10)   | 0.4088(3)  | 0.0593(19)  |
| F(15) | 0.2642(6)   | 0.8440(11)   | 0.4334(3)  | 0.0556(17)  |
| F(16) | 0.3243(5)   | 0.7322(11)   | 0.5290(3)  | 0.0561(17)  |
| F(17) | 0.1948(6)   | 1.0428(7)    | 0.6371(2)  | 0.0419(14)  |
| F(18) | 0.2059(7)   | 0.4732(8)    | 0.5852(3)  | 0.0549(18)  |
| F(19) | 0.2822(9)   | 0.3811(8)    | 0.6815(3)  | 0.072(3)    |
| F(20) | 0.3098(8)   | 0.6177(9)    | 0.7560(3)  | 0.063(2)    |



|        |            |            |           |            |
|--------|------------|------------|-----------|------------|
| F(21)  | 0.0815(7)  | 0.9353(12) | 0.7468(4) | 0.066(2)   |
| F(22)  | 0.0873(9)  | 1.1885(13) | 0.8152(4) | 0.076(3)   |
| F(23)  | 0.2749(9)  | 1.3542(10) | 0.8445(3) | 0.069(2)   |
| F(24)  | 0.4541(7)  | 1.2648(9)  | 0.8060(3) | 0.0589(18) |
| C(19)  | 0.0586(9)  | 0.8863(11) | 0.5414(4) | 0.0340(19) |
| C(20)  | 0.0302(9)  | 0.9438(13) | 0.4926(4) | 0.040(2)   |
| C(21)  | 0.0982(11) | 0.9329(14) | 0.4565(4) | 0.045(3)   |
| C(22)  | 0.1975(10) | 0.8553(14) | 0.4688(4) | 0.043(2)   |
| C(23)  | 0.2254(9)  | 0.8008(13) | 0.5177(4) | 0.040(2)   |
| C(24)  | 0.1592(9)  | 0.8148(12) | 0.5558(4) | 0.038(2)   |
| C(25)  | 0.1991(8)  | 0.7625(12) | 0.6083(4) | 0.0343(19) |
| C(26)  | 0.2163(8)  | 0.8780(11) | 0.6484(4) | 0.0332(19) |
| C(27)  | 0.2536(8)  | 0.8382(12) | 0.6985(4) | 0.0338(19) |
| C(28)  | 0.2745(9)  | 0.6658(13) | 0.7090(4) | 0.041(2)   |
| C(29)  | 0.2592(10) | 0.5457(13) | 0.6705(5) | 0.045(2)   |
| C(30)  | 0.2215(9)  | 0.5925(13) | 0.6210(5) | 0.041(2)   |
| C(31)  | 0.2648(9)  | 0.9698(13) | 0.7386(4) | 0.036(2)   |
| C(32)  | 0.3610(9)  | 1.0561(13) | 0.7537(4) | 0.036(2)   |
| C(33)  | 0.3629(11) | 1.1825(12) | 0.7899(4) | 0.043(3)   |
| C(34)  | 0.2713(12) | 1.2268(16) | 0.8111(4) | 0.050(3)   |
| C(35)  | 0.1760(11) | 1.1440(17) | 0.7960(5) | 0.050(3)   |
| C(36)  | 0.1760(10) | 1.0160(15) | 0.7606(5) | 0.044(2)   |
| H(37A) | 0.636631   | 0.533684   | 0.514059  | 0.115      |
| H(37B) | 0.752444   | 0.544658   | 0.543567  | 0.115      |
| H(37C) | 0.677623   | 0.70448    | 0.540114  | 0.115      |
| H(38A) | 0.485816   | 0.550243   | 0.561262  | 0.121      |
| H(38B) | 0.521366   | 0.68202    | 0.604646  | 0.121      |
| H(38C) | 0.505027   | 0.490828   | 0.61841   | 0.121      |
| H(39A) | 0.571349   | 0.605536   | 0.711858  | 0.107      |
| H(39B) | 0.576652   | 0.525107   | 0.766499  | 0.107      |
| H(39C) | 0.522523   | 0.425035   | 0.718736  | 0.107      |
| H(40A) | 0.694519   | 0.244904   | 0.778392  | 0.097      |
| H(40B) | 0.755652   | 0.412522   | 0.795871  | 0.097      |
| H(40C) | 0.803156   | 0.288163   | 0.75809   | 0.097      |
| H(41A) | 0.942172   | 0.23847    | 0.709854  | 0.114      |
| H(41B) | 0.98553    | 0.425072   | 0.715516  | 0.114      |
| H(41C) | 1.041216   | 0.292799   | 0.683075  | 0.114      |
| H(42A) | 0.89477    | 0.347448   | 0.571672  | 0.092      |
| H(42B) | 1.010314   | 0.318006   | 0.599971  | 0.092      |
| H(42C) | 0.965542   | 0.503105   | 0.591714  | 0.092      |

**Table S29.** Anisotropic displacement parameters [ $\text{\AA}^2$ ] for **anti-m-1-TDAI**

|       | U11       | U22       | U33       | U23        | U13       | U12        |
|-------|-----------|-----------|-----------|------------|-----------|------------|
| I(1)  | 0.0415(4) | 0.0484(3) | 0.0337(3) | 0.0014(2)  | 0.0032(2) | 0.0045(3)  |
| I(2)  | 0.0338(3) | 0.0349(3) | 0.0340(3) | -0.0009(2) | 0.0021(2) | -0.0027(2) |
| I(3)  | 0.0409(3) | 0.0370(3) | 0.0375(3) | -0.0014(2) | 0.0022(2) | 0.0036(2)  |
| F(1)  | 0.047(4)  | 0.056(4)  | 0.036(3)  | 0.004(3)   | 0.007(3)  | -0.019(3)  |
| F(2)  | 0.046(4)  | 0.045(3)  | 0.053(4)  | -0.002(3)  | 0.007(3)  | -0.023(3)  |
| F(3)  | 0.058(4)  | 0.051(3)  | 0.044(3)  | -0.017(3)  | 0.006(3)  | -0.021(3)  |
| F(4)  | 0.049(4)  | 0.046(3)  | 0.038(3)  | -0.005(2)  | 0.015(3)  | -0.010(3)  |
| F(5)  | 0.038(3)  | 0.022(2)  | 0.068(4)  | -0.003(2)  | 0.012(3)  | 0.000(2)   |
| F(6)  | 0.038(3)  | 0.033(3)  | 0.050(3)  | -0.001(2)  | 0.013(3)  | 0.006(2)   |
| F(7)  | 0.061(4)  | 0.019(3)  | 0.092(5)  | -0.003(3)  | 0.028(4)  | -0.001(3)  |
| F(8)  | 0.045(4)  | 0.033(3)  | 0.080(5)  | 0.000(3)   | 0.027(3)  | -0.012(3)  |
| F(9)  | 0.051(4)  | 0.075(5)  | 0.047(4)  | -0.003(3)  | 0.019(3)  | 0.018(4)   |
| F(10) | 0.040(4)  | 0.074(5)  | 0.069(5)  | 0.004(4)   | 0.016(3)  | 0.022(3)   |
| F(11) | 0.038(4)  | 0.069(4)  | 0.060(4)  | 0.008(3)   | -0.007(3) | 0.008(3)   |
| F(12) | 0.053(4)  | 0.056(4)  | 0.036(3)  | 0.002(3)   | 0.005(3)  | 0.005(3)   |
| C(1)  | 0.029(5)  | 0.032(4)  | 0.026(4)  | -0.001(3)  | -0.003(3) | -0.004(4)  |
| C(2)  | 0.039(5)  | 0.033(5)  | 0.037(5)  | 0.006(4)   | 0.007(4)  | -0.001(4)  |
| C(3)  | 0.037(5)  | 0.028(4)  | 0.044(5)  | -0.002(4)  | 0.001(4)  | -0.008(4)  |
| C(4)  | 0.036(5)  | 0.032(4)  | 0.041(5)  | -0.004(4)  | 0.001(4)  | -0.008(4)  |
| C(5)  | 0.031(5)  | 0.032(4)  | 0.040(5)  | 0.000(4)   | 0.009(4)  | 0.000(4)   |
| C(6)  | 0.024(4)  | 0.029(4)  | 0.032(4)  | 0.003(3)   | 0.000(3)  | 0.001(3)   |
| C(7)  | 0.026(5)  | 0.025(4)  | 0.039(5)  | 0.000(4)   | 0.004(4)  | -0.004(4)  |
| C(8)  | 0.032(5)  | 0.029(4)  | 0.033(4)  | -0.002(3)  | 0.008(4)  | 0.002(4)   |
| C(9)  | 0.038(6)  | 0.023(4)  | 0.052(6)  | 0.000(4)   | 0.011(4)  | -0.002(4)  |
| C(10) | 0.042(5)  | 0.027(4)  | 0.044(5)  | 0.001(4)   | 0.011(4)  | -0.009(4)  |
| C(11) | 0.032(5)  | 0.030(4)  | 0.033(4)  | -0.002(3)  | 0.006(4)  | -0.001(4)  |
| C(12) | 0.034(5)  | 0.021(4)  | 0.041(5)  | -0.002(3)  | 0.002(4)  | 0.002(3)   |
| C(13) | 0.025(5)  | 0.028(4)  | 0.036(4)  | -0.001(3)  | 0.003(3)  | -0.004(3)  |
| C(14) | 0.033(5)  | 0.029(4)  | 0.041(5)  | -0.001(4)  | 0.005(4)  | 0.002(4)   |
| C(15) | 0.043(6)  | 0.042(5)  | 0.045(6)  | -0.002(4)  | 0.007(4)  | 0.005(5)   |
| C(16) | 0.040(6)  | 0.042(5)  | 0.053(6)  | 0.000(5)   | 0.009(5)  | 0.005(4)   |
| C(17) | 0.030(5)  | 0.040(5)  | 0.051(6)  | 0.005(4)   | 0.000(4)  | 0.003(4)   |
| C(18) | 0.042(6)  | 0.032(4)  | 0.043(5)  | 0.000(4)   | 0.011(4)  | -0.007(4)  |
| N(1)  | 0.059(7)  | 0.041(5)  | 0.072(7)  | -0.001(5)  | -0.017(6) | 0.004(5)   |
| N(2)  | 0.065(7)  | 0.042(5)  | 0.071(7)  | 0.006(5)   | 0.013(6)  | -0.005(5)  |
| N(3)  | 0.046(6)  | 0.060(6)  | 0.057(6)  | 0.000(5)   | -0.005(5) | 0.001(5)   |
| C(37) | 0.104(14) | 0.048(7)  | 0.069(10) | -0.007(6)  | -0.024(9) | 0.024(8)   |
| C(38) | 0.061(10) | 0.057(8)  | 0.115(15) | 0.005(8)   | -0.023(9) | 0.011(7)   |
| C(39) | 0.070(10) | 0.042(6)  | 0.107(13) | 0.006(7)   | 0.033(9)  | -0.001(6)  |
| C(40) | 0.079(10) | 0.048(7)  | 0.067(8)  | -0.001(6)  | 0.012(7)  | -0.013(6)  |
| C(41) | 0.050(8)  | 0.112(13) | 0.064(9)  | -0.001(8)  | -0.004(7) | 0.026(8)   |
| C(42) | 0.073(9)  | 0.038(6)  | 0.075(9)  | 0.001(6)   | 0.020(7)  | 0.005(6)   |
| C(43) | 0.056(7)  | 0.025(4)  | 0.066(8)  | -0.007(5)  | -0.013(6) | -0.001(5)  |
| C(44) | 0.049(7)  | 0.033(5)  | 0.057(7)  | -0.006(4)  | 0.001(5)  | -0.005(4)  |
| C(45) | 0.051(7)  | 0.030(5)  | 0.050(6)  | 0.002(4)   | -0.004(5) | 0.000(4)   |
| I(4)  | 0.0406(4) | 0.0336(3) | 0.0424(3) | -0.0034(2) | 0.0021(2) | 0.0039(2)  |
| I(5)  | 0.0390(3) | 0.0365(3) | 0.0478(3) | -0.0061(2) | 0.0031(3) | -0.0014(2) |

|       |          |          |          |           |           |           |
|-------|----------|----------|----------|-----------|-----------|-----------|
| F(13) | 0.053(4) | 0.063(4) | 0.050(4) | 0.009(3)  | -0.011(3) | 0.018(3)  |
| F(14) | 0.069(5) | 0.069(5) | 0.038(3) | 0.009(3)  | -0.001(3) | -0.012(4) |
| F(15) | 0.047(4) | 0.073(4) | 0.048(4) | -0.011(3) | 0.012(3)  | -0.011(3) |
| F(16) | 0.037(4) | 0.074(5) | 0.056(4) | -0.010(3) | 0.001(3)  | 0.010(3)  |
| F(17) | 0.060(4) | 0.024(2) | 0.039(3) | 0.001(2)  | -0.006(3) | -0.002(3) |
| F(18) | 0.069(5) | 0.036(3) | 0.057(4) | -0.018(3) | -0.006(3) | 0.007(3)  |
| F(19) | 0.115(7) | 0.026(3) | 0.069(5) | -0.001(3) | -0.011(5) | 0.022(4)  |
| F(20) | 0.096(6) | 0.042(3) | 0.046(4) | 0.008(3)  | -0.010(4) | 0.009(4)  |
| F(21) | 0.046(4) | 0.083(5) | 0.071(5) | -0.017(4) | 0.017(4)  | -0.004(4) |
| F(22) | 0.082(6) | 0.090(6) | 0.062(5) | -0.016(4) | 0.036(4)  | 0.020(5)  |
| F(23) | 0.118(7) | 0.050(4) | 0.043(4) | -0.016(3) | 0.024(4)  | 0.000(4)  |
| F(24) | 0.078(5) | 0.049(4) | 0.049(4) | -0.016(3) | 0.007(3)  | -0.012(4) |
| C(19) | 0.035(5) | 0.030(4) | 0.034(5) | -0.007(4) | -0.004(4) | 0.001(4)  |
| C(20) | 0.041(6) | 0.039(5) | 0.037(5) | 0.000(4)  | -0.005(4) | 0.002(4)  |
| C(21) | 0.060(7) | 0.043(5) | 0.029(5) | -0.001(4) | -0.009(5) | -0.009(5) |
| C(22) | 0.046(6) | 0.041(5) | 0.040(5) | -0.011(4) | 0.004(4)  | -0.005(4) |
| C(23) | 0.031(5) | 0.041(5) | 0.046(5) | -0.012(4) | 0.000(4)  | 0.000(4)  |
| C(24) | 0.038(6) | 0.030(4) | 0.043(5) | -0.008(4) | -0.009(4) | 0.000(4)  |
| C(25) | 0.028(4) | 0.032(4) | 0.041(5) | -0.004(4) | -0.002(4) | 0.006(4)  |
| C(26) | 0.036(5) | 0.024(4) | 0.038(5) | -0.002(4) | 0.001(4)  | 0.002(4)  |
| C(27) | 0.032(5) | 0.029(4) | 0.040(5) | 0.003(4)  | 0.002(4)  | -0.002(3) |
| C(28) | 0.043(6) | 0.035(5) | 0.041(5) | 0.001(4)  | -0.003(4) | 0.010(4)  |
| C(29) | 0.052(7) | 0.029(5) | 0.053(6) | 0.000(4)  | -0.002(5) | 0.010(4)  |
| C(30) | 0.042(6) | 0.033(5) | 0.046(6) | -0.009(4) | -0.002(4) | 0.004(4)  |
| C(31) | 0.046(6) | 0.036(5) | 0.028(5) | 0.005(4)  | 0.008(4)  | 0.006(4)  |
| C(32) | 0.041(6) | 0.035(5) | 0.030(5) | 0.002(4)  | 0.000(4)  | 0.003(4)  |
| C(33) | 0.067(8) | 0.029(4) | 0.033(5) | -0.001(4) | 0.002(5)  | -0.005(4) |
| C(34) | 0.075(9) | 0.045(6) | 0.031(5) | -0.002(4) | 0.018(5)  | 0.009(6)  |
| C(35) | 0.060(8) | 0.054(6) | 0.040(6) | -0.002(5) | 0.016(5)  | 0.012(6)  |
| C(36) | 0.041(6) | 0.048(6) | 0.044(6) | 0.001(5)  | 0.010(4)  | 0.006(5)  |

## C.) References

- 1 M. Meyer, W. Paciorek, A. Kowalski, A. Muszynski, A. Wisniewski, M. Pol, M. Przewozniczek, P. Stec, D. Bujnik, H. Kulza, M. Grzesczyk, T. Kuna, L. Serwata, G. Prochniak, W. Piotrowski, M. Antkowiak, R. Jasiak, M. Idzi, H. Yoshida, T. Hendrixson, C. Archeson and T. Wodziczko, *CrysAlisPro*, Rigaku Oxford Diffraction (1995-2018), 2018.
- 2 L. J. Farrugia, *J. Appl. Crystallogr.*, 1999, **32**, 837–838.
- 3 G. M. Sheldrick, *Acta Crystallogr A Found Crystallogr*, 2008, **64**, 112–122.
- 4 C. B. Hübschle, G. M. Sheldrick and B. Dittrich, *J. Appl. Crystallogr.*, 2011, **44**, 1281–1284.
- 5 H. Putz and K. Brandenburg, *Diamond. Crystal and Molecular Structure Visualization*, Crystal Impact, Bonn, Deutschland, 2014.
